# Supplementary material for: Synergistic and antagonistic effects of immunomodulatory drugs on the action of antifungals against Candida glabrata and Saccharomyces cerevisiae
Source: PeerJ. 2018 Jun 13;6:e4999. doi: 10.7717/peerj.4999 (PMC6004109; doi:10.7717/peerj.4999)
Supplement: Supplemental Information 2 — Layout scheme of the data is at the beginning of each sheet (sheet for drug susceptibility and sheet for checkerboard assay). Stock solutions of the drugs used in this study included as well. [file peerj-06-4999-s002.xlsx]

## Sheet: Drug_Susceptibility
AMX [mg/L]	Sc3	Sc4	Sc5	Sc6	Cg1	Cg2	Cg3	Cg4	Cg5	Cg6	Sc1	Sc2	strain
0	0.1038	0.06303	0.09397	0.0626	0.1532	0.1545	0.1668	0.16725	0.1931	0.21908	0.14073	0.12937
6.25	0.101	0.06825	0.09185	0.10562	0.11568	0.11513	0.11448	0.13935	0.13035	0.16235	0.10412	0.145
12.5	0.08815	0.08795	0.09335	0.06407	0.12248	0.11335	0.11312	0.10225	0.14045	0.18275	0.08818	0.1162
25	0.09815	0.0812	0.09053	0.10592	0.13175	0.1113	0.10753	0.10472	0.16692	0.16998	0.09693	0.1231
50	0.1342	0.07463	0.09033	0.09298	0.13545	0.1137	0.11765	0.0989	0.1319	0.19043	0.13093	0.1281
100	0.13467	0.08912	0.0926	0.09417	0.13445	0.12952	0.11368	0.11813	0.13655	0.14728	0.10557	0.10413
200	0.09223	0.0824	0.08527	0.08457	0.11665	0.11837	0.1251	0.10597	0.13782	0.15795	0.09645	0.11675
400	0.09795	0.13913	0.11028	0.09915	0.1633	0.17012	0.17615	0.19375	0.1873	0.17575	0.14125	0.1161
AMX [mg/L]	Sc3	Sc4	Sc5	Sc6	Cg1	Cg2	Cg3	Cg4	Cg5	Cg6	Sc1	Sc2	strain
0	0.1469	0.11897	0.1426	0.13137	0.21628	0.2068	0.22618	0.20363	0.2017	0.23692	0.15403	0.14925
6.25	0.1884	0.097775	0.099875	0.14298	0.16725	0.17975	0.1915	0.15828	0.17793	0.19113	0.1367	0.1563
12.5	0.19465	0.085675	0.10368	0.13397	0.1829	0.14565	0.18232	0.19055	0.1698	0.19267	0.15872	0.14408
25	0.18237	0.10925	0.10437	0.13592	0.15088	0.13363	0.20193	0.19293	0.16095	0.17812	0.13837	0.16453
50	0.1545	0.091325	0.1214	0.13348	0.1413	0.13383	0.18425	0.18713	0.15992	0.18707	0.1603	0.15892
100	0.08345	0.11007	0.136	0.12785	0.15117	0.12472	0.17258	0.1699	0.15342	0.16765	0.1745	0.16295
200	0.14957	0.13935	0.12918	0.13217	0.15462	0.11247	0.17303	0.1686	0.1422	0.16997	0.14975	0.13997
400	0.15915	0.14742	0.12797	0.16772	0.18982	0.17695	0.22582	0.254	0.22598	0.26867	0.2121	0.21185
AMX [mg/L]	Sc3	Sc4	Sc5	Sc6	Cg1	Cg2	Cg3	Cg4	Cg5	Cg6	Sc1	Sc2	strain
0	0.27413	0.11443	0.1409	0.13285	0.21163	0.20635	0.21412	0.20083	0.19875	0.20935	0.16377	0.16235
6.25	0.1815	0.10782	0.1333	0.13997	0.21613	0.16852	0.20055	0.19663	0.1682	0.21547	0.15255	0.14983
12.5	0.12853	0.11278	0.1374	0.13532	0.20385	0.16252	0.21657	0.1796	0.17777	0.20655	0.16142	0.17478
25	0.14605	0.11527	0.12212	0.14875	0.18412	0.1565	0.1913	0.17683	0.18118	0.19565	0.15393	0.16363
50	0.11465	0.11482	0.14142	0.14842	0.18795	0.13515	0.17638	0.1686	0.17145	0.21252	0.16265	0.1639
100	0.14518	0.1352	0.12817	0.1479	0.1861	0.1409	0.16835	0.18982	0.17425	0.18285	0.17147	0.16575
200	0.13795	0.13172	0.13502	0.14273	0.17335	0.1592	0.15345	0.18033	0.15965	0.19345	0.1561	0.16903
400	0.1633	0.1884	0.14227	0.14077	0.1972	0.18515	0.21555	0.2115	0.2009	0.27795	0.22508	0.15423
AMX [mg/L]	Sc3	Sc4	Sc5	Sc6	Cg1	Cg2	Cg3	Cg4	Cg5	Cg6	Sc1	Sc2	strain
0	0.16113	0.13127	0.14548	0.142	0.24707	0.20075	0.2322	0.25288	0.22842	0.2432	0.16737	0.16205
6.25	0.13702	0.13165	0.13862	0.14992	0.21548	0.1942	0.20793	0.21522	0.20623	0.23523	0.16245	0.1669
12.5	0.11675	0.1147	0.15273	0.14325	0.2048	0.1799	0.2241	0.21057	0.18117	0.22905	0.16925	0.16755
25	0.1425	0.13855	0.13342	0.14255	0.21385	0.17478	0.20313	0.21962	0.1994	0.22712	0.17188	0.16665
50	0.1183	0.12703	0.15695	0.1486	0.20265	0.17055	0.20483	0.1937	0.19072	0.24185	0.15732	0.16262
100	0.13448	0.11258	0.13627	0.1491	0.19922	0.15975	0.20428	0.18702	0.19155	0.2207	0.15725	0.15675
200	0.17855	0.15018	0.16435	0.1508	0.20068	0.15783	0.21297	0.215	0.19273	0.24593	0.19623	0.1726
400	0.21463	0.16447	0.1405	0.13602	0.18625	0.20553	0.22083	0.26315	0.23577	0.2725	0.18965	0.1985
MPA [mg/L]	Sc3	Sc4	Sc5	Sc6	Cg1	Cg2	Cg3	Cg4	Cg5	Cg6	Sc1	Sc2	strain
0	0.10805	0.0957	0.12743	0.07718	0.18445	0.18175	0.2065	0.2278	0.18268	0.21798	0.14163	0.1532
1.875	0.06258	0.0739	0.09135	0.08563	0.15968	0.13762	0.15202	0.1581	0.14935	0.17708	0.10965	0.12162
3.75	0.08835	0.07515	0.11167	0.08635	0.15805	0.1452	0.1568	0.16637	0.14943	0.19028	0.10597	0.12497
7.5	0.048575	0.12115	0.09325	0.0804	0.18193	0.15307	0.1852	0.17448	0.13645	0.16527	0.13042	0.1368
15	0.11662	0.09195	0.1073	0.09522	0.1866	0.15383	0.18272	0.16735	0.16525	0.2034	0.11007	0.16938
30	0.09245	0.10375	0.08807	0.09058	0.1672	0.12975	0.1612	0.15605	0.13312	0.1795	0.12718	0.11715
60	0.1024	0.07725	0.07247	0.09153	0.16835	0.1376	0.16652	0.14008	0.18117	0.19267	0.13682	0.14748
120	0.1049	0.03085	0.0622	0.08457	0.12862	0.11453	0.15653	0.19977	0.13823	0.15215	0.15907	0.1259
MPA [mg/L]	Sc3	Sc4	Sc5	Sc6	Cg1	Cg2	Cg3	Cg4	Cg5	Cg6	Sc1	Sc2	strain
0	0.14265	0.12265	0.13125	0.137	0.21238	0.19065	0.20745	0.20992	0.21387	0.24458	0.17113	0.15753
1.875	0.18857	0.11867	0.14555	0.15405	0.18397	0.12777	0.15415	0.13645	0.15565	0.17832	0.1323	0.13972
3.75	0.24013	0.10927	0.1435	0.145	0.16198	0.16042	0.1473	0.14295	0.17667	0.1836	0.1777	0.13968
7.5	0.12805	0.12445	0.1445	0.1649	0.1511	0.1273	0.14973	0.15098	0.19065	0.17865	0.15265	0.15585
15	0.12427	0.16945	0.14723	0.1449	0.1719	0.15102	0.17958	0.1576	0.19117	0.17673	0.16488	0.15653
30	0.15518	0.14965	0.12965	0.139	0.20765	0.13125	0.18703	0.15	0.20533	0.17632	0.1658	0.15207
60	0.13927	0.11095	0.10347	0.11787	0.20545	0.137	0.18718	0.1516	0.15268	0.1905	0.18365	0.18072
120	0.14735	0.061275	0.0898	0.11473	0.137	0.11398	0.14893	0.14842	0.1433	0.15465	0.20397	0.18105
MPA [mg/L]	Sc3	Sc4	Sc5	Sc6	Cg1	Cg2	Cg3	Cg4	Cg5	Cg6	Sc1	Sc2	strain
0	0.14683	0.14797	0.14775	0.14887	0.2421	0.19488	0.23535	0.2808	0.25937	0.28183	0.1855	0.16408
1.875	0.15082	0.1118	0.14097	0.15205	0.2134	0.16997	0.20722	0.20768	0.17625	0.22403	0.17603	0.15798
3.75	0.19765	0.13405	0.13912	0.15473	0.21508	0.16477	0.21018	0.1833	0.20542	0.22478	0.14228	0.1576
7.5	0.16243	0.11857	0.15575	0.1462	0.21685	0.15283	0.21032	0.18895	0.22177	0.23012	0.16762	0.1458
15	0.16612	0.14455	0.15775	0.1391	0.17875	0.16385	0.20377	0.1955	0.22017	0.22508	0.16865	0.16365
30	0.20193	0.14137	0.13158	0.12822	0.20202	0.16243	0.22693	0.17735	0.20853	0.20855	0.2095	0.169
60	0.1458	0.12618	0.10932	0.12793	0.1881	0.13395	0.21085	0.17662	0.16322	0.19688	0.15548	0.16695
120	0.15275	0.05455	0.088425	0.11802	0.1379	0.11	0.1373	0.15198	0.14065	0.14912	0.1913	0.19007
MPA [mg/L]	Sc3	Sc4	Sc5	Sc6	Cg1	Cg2	Cg3	Cg4	Cg5	Cg6	Sc1	Sc2	strain
0	0.16345	0.12695	0.11613	0.12358	0.20355	0.20955	0.25	0.21868	0.2494	0.25512	0.17885	0.17118
1.875	0.15882	0.14355	0.12775	0.14593	0.23972	0.18475	0.2305	0.23373	0.2072	0.2276	0.15982	0.1671
3.75	0.1838	0.12705	0.14603	0.13717	0.22067	0.20212	0.22705	0.20245	0.2167	0.24305	0.15162	0.1456
7.5	0.1382	0.13415	0.1565	0.14267	0.19677	0.1905	0.2314	0.21192	0.21515	0.25495	0.1521	0.1439
15	0.16597	0.15182	0.14932	0.23935	0.18978	0.19942	0.23525	0.21702	0.24917	0.24707	0.17918	0.16403
30	0.22895	0.15415	0.13598	0.13312	0.18387	0.17805	0.20297	0.19765	0.24858	0.23585	0.17575	0.16895
60	0.14423	0.1131	0.10145	0.10922	0.1848	0.1578	0.21723	0.2065	0.21765	0.20315	0.18117	0.16385
120	0.1469	0.063825	0.084625	0.10955	0.1309	0.10845	0.13537	0.13987	0.1389	0.14867	0.1529	0.1637
Fk506 [mg/L]	Sc3	Sc4	Sc5	Sc6	Cg1	Cg2	Cg3	Cg4	Cg5	Cg6	Sc1	Sc2	strain
0	0.13928	0.11423	0.14942	0.1314	0.2265	0.19542	0.21563	0.20632	0.2258	0.25107	0.15202	0.16188
6.25	0.20408	0.13162	0.14235	0.13047	0.17278	0.13702	0.17522	0.1627	0.1696	0.21617	0.13987	0.14365
12.5	0.10098	0.11925	0.13612	0.10087	0.19485	0.17413	0.18985	0.1733	0.1702	0.21572	0.16157	0.16335
25	0.15428	0.13358	0.13528	0.10997	0.23265	0.18827	0.22315	0.20777	0.1701	0.20707	0.22348	0.20302
50	0.092875	0.10892	0.14102	0.11053	0.22238	0.1824	0.2214	0.23127	0.22998	0.2661	0.21673	0.20485
100	0.44172	0.0895	0.14728	0.10732	0.23217	0.18638	0.2242	0.24613	0.23478	0.24318	0.20593	0.197
200	0.0846	0.061825	0.14295	0.071325	0.20292	0.18042	0.20485	0.22965	0.21075	0.20665	0.18238	0.17568
400	0.07405	0.0426	0.1399	0.049925	0.18067	0.17355	0.1745	0.20063	0.18372	0.18325	0.15988	0.1596
Fk506 [mg/L]	Sc3	Sc4	Sc5	Sc6	Cg1	Cg2	Cg3	Cg4	Cg5	Cg6	Sc1	Sc2	strain
0	0.16005	0.10455	0.14355	0.14495	0.18733	0.16015	0.20285	0.16318	0.22653	0.23965	0.16848	0.1574
6.25	0.2834	0.1406	0.1247	0.13612	0.15745	0.13373	0.15745	0.15372	0.15558	0.18227	0.12847	0.12968
12.5	0.159	0.14533	0.13595	0.095275	0.18458	0.14267	0.1775	0.13845	0.1599	0.20045	0.15532	0.152
25	0.1357	0.13245	0.14312	0.10328	0.21477	0.15913	0.18947	0.16997	0.192	0.2091	0.20642	0.17177
50	0.0868	0.10593	0.13725	0.10863	0.19883	0.17462	0.19945	0.20198	0.18512	0.23368	0.18127	0.18117
100	0.0584	0.09975	0.13792	0.09825	0.20208	0.1832	0.20877	0.20685	0.1904	0.22532	0.18597	0.1811
200	0.15997	0.067325	0.1344	0.0701	0.18618	0.1696	0.19738	0.21855	0.18542	0.18053	0.16735	0.173
400	0.053075	0.0659	0.1403	0.048075	0.18945	0.18628	0.18747	0.21035	0.20525	0.1779	0.1562	0.1553
Fk506 [mg/L]	Sc3	Sc4	Sc5	Sc6	Cg1	Cg2	Cg3	Cg4	Cg5	Cg6	Sc1	Sc2	strain
0	0.14838	0.12575	0.139	0.13635	0.20248	0.1951	0.19942	0.1741	0.24803	0.2348	0.17295	0.16575
6.25	0.21987	0.12095	0.1412	0.1113	0.16557	0.1368	0.16833	0.15528	0.17862	0.19865	0.13525	0.1553
12.5	0.14513	0.11077	0.13082	0.10098	0.20427	0.13498	0.1579	0.15445	0.1704	0.20232	0.1784	0.1679
25	0.20238	0.1149	0.13983	0.10203	0.18397	0.15797	0.18653	0.17592	0.18878	0.21705	0.2238	0.19575
50	0.17033	0.11138	0.1335	0.10995	0.19415	0.16508	0.20062	0.2054	0.20032	0.24518	0.17622	0.1764
100	0.3203	0.092125	0.132	0.097875	0.20585	0.18185	0.19643	0.19662	0.18007	0.23862	0.16995	0.17417
200	0.14335	0.062075	0.14277	0.069325	0.1858	0.17092	0.18255	0.18905	0.16465	0.18213	0.1648	0.16443
400	0.065125	0.0398	0.13475	0.046375	0.19387	0.16952	0.19685	0.20628	0.19465	0.19118	0.14623	0.14783
CsA [mg/L]	Sc3	Sc4	Sc5	Sc6	Cg1	Cg2	Cg3	Cg4	Cg5	Cg6	Sc1	Sc2	strain
0	0.10698	0.08378	0.11988	0.10983	0.1853	0.1914	0.22553	0.22862	0.19182	0.27947	0.12535	0.14535
0.25	0.11955	0.09678	0.12865	0.10207	0.11887	0.1219	0.1487	0.10557	0.1466	0.13623	0.0988	0.1119
0.5	0.1007	0.0683	0.0946	0.09365	0.1291	0.14707	0.17	0.15672	0.1323	0.16073	0.08288	0.121575
1	0.1129	0.1163	0.11585	0.10305	0.172	0.13745	0.14907	0.13428	0.1472	0.18075	0.14593	0.1279
2	0.1158	0.16673	0.1302	0.10215	0.21022	0.15818	0.1529	0.20053	0.17963	0.242	0.18592	0.1753
4	0.10295	0.1615	0.14762	0.0883	0.1307	0.16222	0.1131	0.1972	0.17327	0.24015	0.16013	0.15373
8	0.07823	0.14187	0.1276	0.07303	0.11052	0.13725	0.10675	0.19873	0.15518	0.21885	0.1695	0.1485
16	0.017425	0.057475	0.09888	0.0474	0.15255	0.13175	0.14995	0.17607	0.1557	0.20515	0.13248	0.11995
CsA [mg/L]	Sc3	Sc4	Sc5	Sc6	Cg1	Cg2	Cg3	Cg4	Cg5	Cg6	Sc1	Sc2	strain
0	0.1469	0.11897	0.1426	0.13137	0.21628	0.2068	0.22618	0.20363	0.2017	0.23692	0.15403	0.14925
0.25	0.1884	0.097775	0.099875	0.14298	0.16725	0.17975	0.1915	0.15828	0.17793	0.19113	0.1367	0.1563
0.5	0.19465	0.085675	0.10368	0.13397	0.1829	0.14565	0.18232	0.19055	0.1698	0.19267	0.15872	0.14408
1	0.18237	0.10925	0.10437	0.13592	0.15088	0.13363	0.20193	0.19293	0.16095	0.17812	0.13837	0.16453
2	0.1545	0.091325	0.1214	0.13348	0.1413	0.13383	0.18425	0.18713	0.15992	0.18707	0.1603	0.15892
4	0.08345	0.11007	0.136	0.12785	0.15117	0.12472	0.17258	0.1699	0.15342	0.16765	0.1745	0.16295
8	0.14957	0.13935	0.12918	0.13217	0.15462	0.11247	0.17303	0.1686	0.1422	0.16997	0.14975	0.13997
16	0.15915	0.14742	0.12797	0.16772	0.18982	0.17695	0.22582	0.254	0.22598	0.26867	0.2121	0.21185
CsA [mg/L]	Sc3	Sc4	Sc5	Sc6	Cg1	Cg2	Cg3	Cg4	Cg5	Cg6	Sc1	Sc2	strain
0	0.27413	0.11443	0.1409	0.13285	0.21163	0.20635	0.21412	0.20083	0.19875	0.20935	0.16377	0.16235
0.25	0.1815	0.10782	0.1333	0.13997	0.21613	0.16852	0.20055	0.19663	0.1682	0.21547	0.15255	0.14983
0.5	0.12853	0.11278	0.1374	0.13532	0.20385	0.16252	0.21657	0.1796	0.17777	0.20655	0.16142	0.17478
1	0.14605	0.11527	0.12212	0.14875	0.18412	0.1565	0.1913	0.17683	0.18118	0.19565	0.15393	0.16363
2	0.11465	0.11482	0.14142	0.14842	0.18795	0.13515	0.17638	0.1686	0.17145	0.21252	0.16265	0.1639
4	0.14518	0.1352	0.12817	0.1479	0.1861	0.1409	0.16835	0.18982	0.17425	0.18285	0.17147	0.16575
8	0.13795	0.13172	0.13502	0.14273	0.17335	0.1592	0.15345	0.18033	0.15965	0.19345	0.1561	0.16903
16	0.1633	0.1884	0.14227	0.14077	0.1972	0.18515	0.21555	0.2115	0.2009	0.27795	0.22508	0.15423
CsA [mg/L]	Sc3	Sc4	Sc5	Sc6	Cg1	Cg2	Cg3	Cg4	Cg5	Cg6	Sc1	Sc2	strain
0	0.16113	0.13127	0.14548	0.142	0.24707	0.20075	0.2322	0.25288	0.22842	0.2432	0.16737	0.16205
0.25	0.13702	0.13165	0.13862	0.14992	0.21548	0.1942	0.20793	0.21522	0.20623	0.23523	0.16245	0.1669
0.5	0.11675	0.1147	0.15273	0.14325	0.2048	0.1799	0.2241	0.21057	0.18117	0.22905	0.16925	0.16755
1	0.1425	0.13855	0.13342	0.14255	0.21385	0.17478	0.20313	0.21962	0.1994	0.22712	0.17188	0.16665
2	0.1183	0.12703	0.15695	0.1486	0.20265	0.17055	0.20483	0.1937	0.19072	0.24185	0.15732	0.16262
4	0.13448	0.11258	0.13627	0.1491	0.19922	0.15975	0.20428	0.18702	0.19155	0.2207	0.15725	0.15675
8	0.17855	0.15018	0.16435	0.1508	0.20068	0.15783	0.21297	0.215	0.19273	0.24593	0.19623	0.1726
16	0.21463	0.16447	0.1405	0.13602	0.18625	0.20553	0.22083	0.26315	0.23577	0.2725	0.18965	0.1985
MTX [mg/L]	Sc3	Sc4	Sc5	Sc6	Cg1	Cg2	Cg3	Cg4	Cg5	Cg6	Sc1	Sc2	strain
0	0.09902	0.08783	0.09717	0.0784	0.1625	0.1539	0.17825	0.195	0.19707	0.26915	0.11315	0.1304
3.125	0.09183	0.07623	0.0862	0.10393	0.11863	0.11965	0.12022	0.11268	0.13645	0.14067	0.0799	0.12387
6.25	0.11865	0.09307	0.1122	0.08475	0.12528	0.1349	0.13015	0.1368	0.15262	0.14275	0.0991	0.115
12.5	0.1126	0.08565	0.10297	0.09772	0.14848	0.13107	0.1422	0.14608	0.13565	0.15038	0.07072	0.13483
25	0.1194	0.0968	0.0923	0.06303	0.15333	0.12085	0.1309	0.1369	0.14762	0.1293	0.08765	0.1009
50	0.12602	0.0992	0.0858	0.060375	0.12258	0.10748	0.11157	0.11785	0.16367	0.13147	0.08238	0.11068
100	0.09998	0.06505	0.06838	0.10385	0.1768	0.1007	0.11633	0.11865	0.11275	0.1199	0.0725	0.1341
200	0.09105	0.1192	0.07693	0.10875	0.14795	0.15315	0.1787	0.213	0.14365	0.15405	0.1353	0.12025
MTX [mg/L]	Sc3	Sc4	Sc5	Sc6	Cg1	Cg2	Cg3	Cg4	Cg6	strain
0	0.14775	0.1639	0.132	0.13475	0.24635	0.216	0.23875	0.2354	0.27143
3.125	0.15303	0.14532	0.1316	0.13458	0.246	0.19797	0.18507	0.2129	0.17807
6.25	0.14423	0.13015	0.13637	0.14093	0.23573	0.19175	0.21553	0.2009	0.2054
12.5	0.14935	0.13265	0.1408	0.14022	0.23577	0.1771	0.21248	0.18525	0.17767
25	0.14698	0.11672	0.11953	0.1395	0.21677	0.1565	0.19805	0.16787	0.1933
50	0.1457	0.12607	0.13217	0.13852	0.20523	0.15817	0.196	0.19897	0.18018
100	0.14	0.1386	0.12415	0.1413	0.17733	0.15433	0.17538	0.19305	0.20045
200	0.1184	0.13508	0.12035	0.13045	0.1881	0.21447	0.22615	0.25767	0.24803
MTX [mg/L]	Sc3	Sc4	Sc5	Sc6	Cg1	Cg2	Cg3	Cg4	Cg6	strain
0	0.13618	0.1224	0.13822	0.1356	0.24387	0.2261	0.22693	0.24665	0.25987
3.125	0.1398	0.11697	0.13052	0.13352	0.2213	0.18093	0.1863	0.19128	0.13805
6.25	0.13927	0.14955	0.15268	0.1285	0.22848	0.1977	0.19658	0.1928	0.165
12.5	0.14085	0.1442	0.13332	0.13958	0.2287	0.1964	0.21005	0.18675	0.1728
25	0.1404	0.1122	0.12677	0.13412	0.2075	0.16868	0.17265	0.1663	0.1515
50	0.14222	0.12003	0.12947	0.13737	0.19972	0.15833	0.18227	0.1648	0.162
100	0.13708	0.11478	0.1258	0.12853	0.18735	0.14717	0.1788	0.167	0.16322
200	0.128	0.11655	0.13318	0.1181	0.19647	0.18255	0.2396	0.2857	0.22085
MTX [mg/L]	Sc3	Sc4	Sc5	Sc6	Cg1	Cg2	Cg3	Cg4	Cg6	strain
0	0.1205	0.11565	0.12455	0.1357	0.2255	0.21195	0.2339	0.22025	0.22533
3.125	0.1413	0.1327	0.12385	0.1313	0.21393	0.16942	0.1845	0.1566	0.14733
6.25	0.1497	0.10242	0.13245	0.1338	0.22862	0.19295	0.2018	0.16545	0.1547
12.5	0.1478	0.12167	0.12938	0.12883	0.23678	0.1921	0.19893	0.18197	0.1727
25	0.1403	0.0942	0.13935	0.13405	0.2229	0.16232	0.16115	0.17185	0.17438
50	0.14478	0.10127	0.11878	0.13485	0.21015	0.14675	0.15552	0.15573	0.16347
100	0.1399	0.11918	0.13255	0.13417	0.1917	0.14565	0.15648	0.1636	0.1948
200	0.11073	0.1197	0.1321	0.13017	0.23178	0.204	0.21605	0.25947	0.2345

## Sheet: Checkerboard_assay
Page/plate layout
Strain
Drug 1 (concentration mg/l)
	1	2	3	4	5	6	7	8	9	10	11	12	row number
0	0	0	0	0	0	0	0	0	0	0	0	0
C/32	C/32	C/32	C/32	C/32	C/32	C/32	C/32	C/32	C/32	C/32	C/32	C/32		C = drug 1 concentration
C/16	C/16	C/16	C/16	C/16	C/16	C/16	C/16	C/16	C/16	C/16	C/16	C/16		K+ = positive control
C/8	C/8	C/8	C/8	C/8	C/8	C/8	C/8	C/8	C/8	C/8	C/8	C/8		K- = negative control
C/4	C/4	C/4	C/4	C/4	C/4	C/4	C/4	C/4	C/4	C/4	C/4	C/4		MIC = drug 2 (antifungal) minimal inhibitory concentration
C/2	C/2	C/2	C/2	C/2	C/2	C/2	C/2	C/2	C/2	C/2	C/2	C/2
C	C	C	C	C	C	C	C	C	C	C	C	C
H	+K	+K	+K	+K	media	media	media	media	-K	-K	-K	-K
	2xMIC	MIC	MIC/2	MIC/4	2xMIC	MIC	MIC/2	MIC/4	2xMIC	MIC	MIC/2	MIC/4	Drug 2 (concentration mg/l)
Sc1
MPA	1	2	3	4	5	6	7	8	9	10	11	12
0	0.11932	0.12488	0.15204	0.17581	0.11913	0.12775	0.17265	0.2	0.12062	0.14732	0.17758	0.20657
2	0.11367	0.13147	0.16957	0.19602	0.14192	0.16932	0.18894	0.22863	0.14252	0.16315	0.17409	0.18865
4	0.10912	0.14933	0.17813	0.19685	0.14718	0.17016	0.20184	0.22189	0.14385	0.18617	0.19766	0.20011
8	0.11481	0.15728	0.18674	0.20764	0.161	0.18011	0.20997	0.22712	0.14491	0.19454	0.1962	0.19543
16	0.12076	0.16735	0.19431	0.20692	0.16237	0.18373	0.21104	0.22959	0.15008	0.21746	0.2253	0.21258
32	0.14763	0.17922	0.20192	0.22802	0.18575	0.20325	0.22803	0.22409	0.18127	0.24752	0.22951	0.23242
64	0.20024	0.2181	0.22211	0.20862	0.1915	0.21168	0.22482	0.22917	0.19027	0.23715	0.22395	0.2448
K	0.24021	0.18932	0.20272	0.20422	0.044408	0.0448	0.044383	0.044883	0.12167	0.11637	0.10699	0.095567
	8	4	2	1	8	4	2	1	8	4	2	1	FLC
Sc2
MPA	1	2	3	4	5	6	7	8	9	10	11	12
0	0.12898	0.10627	0.11613	0.10971	0.10568	0.10127	0.10389	0.10668	0.11789	0.11587	0.10826	0.12463
2	0.11065	0.10656	0.1218	0.10709	0.11206	0.13234	0.11648	0.12305	0.11834	0.14443	0.1337	0.12916
4	0.092692	0.11547	0.10475	0.14346	0.11684	0.12062	0.12002	0.1459	0.12712	0.13254	0.13245	0.12551
8	0.099817	0.10783	0.12056	0.1051	0.10813	0.11375	0.11665	0.12368	0.10801	0.12173	0.11139	0.12119
16	0.096042	0.085942	0.081408	0.097725	0.096608	0.098442	0.10723	0.14967	0.084975	0.11037	0.1089	0.13678
32	0.10359	0.091708	0.088825	0.13508	0.10833	0.0996	0.11071	0.16264	0.098817	0.10032	0.10391	0.15292
64	0.10347	0.094425	0.0874	0.13288	0.0965	0.10486	0.14212	0.17357	0.0895	0.094725	0.1034	0.18899
K	0.25354	0.23238	0.23182	0.2233	0.0437	0.044317	0.044517	0.043758	0.094875	0.099	0.085208	0.085042
	256	128	64	32	256	128	64	32	256	128	64	32	FLC
Sc3
MPA	1	2	3	4	5	6	7	8	9	10	11	12
0	0.10243	0.11087	0.12418	0.16162	0.099275	0.11258	0.11987	0.15957	0.11821	0.1195	0.13573	0.20071
2	0.10162	0.095208	0.12779	0.19343	0.10428	0.10732	0.13449	0.17871	0.12021	0.12128	0.15163	0.20912
4	0.094333	0.096883	0.14196	0.1753	0.085025	0.1224	0.15156	0.19993	0.0736	0.11025	0.14952	0.20106
8	0.077858	0.090308	0.14826	0.17938	0.06275	0.067475	0.16082	0.20787	0.058725	0.098058	0.16299	0.20151
16	0.093142	0.099275	0.18638	0.18027	0.05935	0.088292	0.17731	0.20283	0.0645	0.1009	0.17001	0.21604
32	0.087358	0.09705	0.18034	0.18901	0.070858	0.10711	0.17701	0.18801	0.0693	0.10908	0.18908	0.22575
64	0.095042	0.16906	0.15969	0.18706	0.08345	0.16217	0.18543	0.19312	0.0758	0.18941	0.19116	0.21336
K	0.20251	0.18353	0.19732	0.18736	0.044308	0.044675	0.0442	0.044175	0.11009	0.12523	0.10783	0.10023
	64	32	16	8	64	32	16	8	64	32	16	8	FLC
Sc5
MPA	1	2	3	4	5	6	7	8	9	10	11	12
0	0.12622	0.11342	0.16715	0.20033	0.087533	0.091692	0.14495	0.17803	0.10183	0.099192	0.12637	0.23925
2	0.088925	0.06515	0.1768	0.19012	0.089308	0.094583	0.1651	0.20381	0.075375	0.095733	0.18813	0.22634
4	0.078342	0.084217	0.17731	0.18589	0.066	0.10211	0.20284	0.22427	0.08215	0.10573	0.18431	0.22861
8	0.089408	0.081625	0.18003	0.20256	0.083042	0.12587	0.20573	0.20253	0.073375	0.16207	0.19522	0.20796
16	0.0852	0.14735	0.16336	0.1802	0.073158	0.12046	0.20302	0.19706	0.12891	0.11834	0.088008	0.18855
32	0.095542	0.1918	0.15938	0.17168	0.10359	0.17175	0.20008	0.19832	0.16397	0.11839	0.078192	0.18738
64	0.16728	0.16471	0.14179	0.13823	0.16266	0.15717	0.16416	0.17854	0.092408	0.16773	0.16801	0.19067
K	0.25123	0.23559	0.24036	0.199	0.0435	0.042675	0.043867	0.042983	0.13672	0.12818	0.10957	0.11406
	16	8	4	2	16	8	4	2	16	8	4	2	FLC
Sc6
MPA	1	2	3	4	5	6	7	8	9	10	11	12
0	0.12522	0.089325	0.17387	0.1854	0.087275	0.10697	0.18652	0.2088	0.11708	0.1172	0.19412	0.21819
2	0.14574	0.076792	0.2048	0.21763	0.081858	0.16134	0.18956	0.21183	0.076667	0.15502	0.20418	0.19932
4	0.11819	0.10221	0.21503	0.20002	0.078733	0.19375	0.21128	0.2314	0.080292	0.21461	0.22277	0.21447
8	0.093675	0.16769	0.20002	0.18609	0.089258	0.15815	0.19909	0.21293	0.08965	0.16705	0.17096	0.17185
16	0.081442	0.20772	0.19983	0.18502	0.090925	0.19427	0.19931	0.22223	0.10363	0.20731	0.21203	0.20657
32	0.098175	0.18577	0.18474	0.19405	0.095892	0.18802	0.18934	0.20424	0.15818	0.22167	0.22612	0.19203
64	0.098025	0.18502	0.16215	0.15216	0.09585	0.17815	0.18805	0.19919	0.16566	0.204	0.16448	0.17863
K	0.21775	0.19672	0.21753	0.20635	0.044942	0.043625	0.044683	0.044658	0.10253	0.11223	0.098642	0.081758
	16	8	4	2	16	8	4	2	16	8	4	2	FLC
Cg1
MPA	1	2	3	4	5	6	7	8	9	10	11	12
0	0.25184	0.24408	0.26044	0.2649	0.20786	0.2231	0.2482	0.24646	0.21833	0.234	0.28091	0.34927
2	0.22466	0.20552	0.20635	0.23123	0.18913	0.21398	0.22079	0.25421	0.20279	0.21858	0.21408	0.27153
4	0.20819	0.21482	0.19833	0.22853	0.17918	0.20431	0.23276	0.24759	0.19917	0.22385	0.22378	0.2734
8	0.19684	0.18872	0.20599	0.22766	0.20345	0.21147	0.23764	0.24147	0.17803	0.19994	0.21402	0.23377
16	0.21483	0.18955	0.21227	0.22206	0.19973	0.22605	0.23522	0.24043	0.1829	0.22099	0.22292	0.24011
32	0.18696	0.19443	0.19385	0.19738	0.19995	0.19797	0.20503	0.21478	0.19678	0.22538	0.22052	0.22387
64	0.1744	0.16822	0.18117	0.16784	0.17245	0.18846	0.18798	0.18922	0.18613	0.20007	0.20205	0.20881
K	0.24733	0.22197	0.25997	0.24858	0.04275	0.043	0.043542	0.043367	0.10902	0.09985	0.095308	0.086067
	2	1	0.5	0.25	2	1	0.5	0.25	2	1	0.5	0.25	FLC
Cg2
MPA	1	2	3	4	5	6	7	8	9	10	11	12
0	0.12069	0.12942	0.15673	0.19892	0.10877	0.10779	0.15782	0.21507	0.10164	0.11706	0.16211	0.26116
2	0.11942	0.11492	0.17029	0.2009	0.10503	0.11769	0.15627	0.19489	0.10983	0.13184	0.16374	0.22756
4	0.1283	0.14104	0.17053	0.21262	0.11987	0.16142	0.17607	0.2181	0.10913	0.14736	0.1765	0.21293
8	0.12638	0.14694	0.1994	0.20938	0.13039	0.16283	0.19356	0.21399	0.12121	0.15808	0.17895	0.21505
16	0.18087	0.17639	0.20431	0.21365	0.15299	0.18475	0.19422	0.22623	0.16053	0.18125	0.19962	0.21377
32	0.19009	0.18498	0.19959	0.20797	0.17048	0.18602	0.20043	0.22026	0.17048	0.20425	0.21173	0.22983
64	0.20518	0.19269	0.18095	0.19458	0.17982	0.1828	0.19025	0.2123	0.1837	0.20376	0.20425	0.22077
K	0.25188	0.24042	0.22502	0.21243	0.042767	0.042275	0.043333	0.044217	0.1156	0.12031	0.1335	0.11211
	8	4	2	1	8	4	2	1	8	4	2	1	FLC
Cg3
MPA	1	2	3	4	5	6	7	8	9	10	11	12
0	0.14414	0.11763	0.13986	0.17036	0.13213	0.13967	0.14792	0.18922	0.16777	0.14675	0.1612	0.2042
2	0.12865	0.12247	0.16546	0.17828	0.12595	0.12683	0.15958	0.17551	0.14546	0.14677	0.16578	0.20078
4	0.11526	0.12496	0.1629	0.17842	0.11895	0.13463	0.15604	0.18808	0.099392	0.16288	0.18972	0.22368
8	0.12984	0.13872	0.18059	0.18025	0.12638	0.14739	0.18261	0.20403	0.13531	0.1781	0.19444	0.21394
16	0.1346	0.14691	0.17881	0.18811	0.076042	0.17908	0.19467	0.21171	0.0812	0.19968	0.20131	0.21864
32	0.16253	0.16037	0.19404	0.18853	0.079183	0.19817	0.20269	0.21962	0.082283	0.20626	0.20938	0.24173
64	0.16975	0.16754	0.1707	0.18711	0.099225	0.20328	0.19662	0.22303	0.20924	0.21928	0.21333	0.22538
K	0.26049	0.22489	0.22845	0.24662	0.045617	0.043258	0.04285	0.043392	0.094392	0.1039	0.11555	0.10538
	16	8	4	2	16	8	4	2	16	8	4	2	FLC
Cg4
MPA	1	2	3	4	5	6	7	8	9	10	11	12
0	0.14414	0.11763	0.13986	0.17036	0.13213	0.13967	0.14792	0.18922	0.16777	0.14675	0.1612	0.2042
2	0.12865	0.12247	0.16546	0.17828	0.12595	0.12683	0.15958	0.17551	0.14546	0.14677	0.16578	0.20078
4	0.11526	0.12496	0.1629	0.17842	0.11895	0.13463	0.15604	0.18808	0.099392	0.16288	0.18972	0.22368
8	0.12984	0.13872	0.18059	0.18025	0.12638	0.14739	0.18261	0.20403	0.13531	0.1781	0.19444	0.21394
16	0.1346	0.14691	0.17881	0.18811	0.076042	0.17908	0.19467	0.21171	0.0812	0.19968	0.20131	0.21864
32	0.16253	0.16037	0.19404	0.18853	0.079183	0.19817	0.20269	0.21962	0.082283	0.20626	0.20938	0.24173
64	0.16975	0.16754	0.1707	0.18711	0.099225	0.20328	0.19662	0.22303	0.20924	0.21928	0.21333	0.22538
K	0.26049	0.22489	0.22845	0.24662	0.045617	0.043258	0.04285	0.043392	0.094392	0.1039	0.11555	0.10538
	4	2	1	0.5	4	2	1	0.5	4	2	1	0.5	FLC
Cg5
MPA	1	2	3	4	5	6	7	8	9	10	11	12
0	0.10623	0.091708	0.16891	0.17462	0.094167	0.087458	0.17778	0.20093	0.097608	0.10461	0.18822	0.20551
2	0.089017	0.090992	0.13602	0.14259	0.090133	0.11067	0.14696	0.18203	0.099192	0.12459	0.15789	0.20951
4	0.084875	0.083275	0.12795	0.14427	0.099392	0.10093	0.15513	0.18571	0.1014	0.14577	0.16239	0.20808
8	0.093417	0.094867	0.15027	0.15372	0.12301	0.11696	0.15478	0.193	0.10506	0.13813	0.16938	0.22625
16	0.080283	0.12453	0.1549	0.16523	0.08875	0.080675	0.1994	0.20398	0.1041	0.17268	0.20089	0.23817
32	0.10579	0.14376	0.16491	0.16159	0.081917	0.18614	0.20786	0.20171	0.11151	0.18737	0.2111	0.22655
64	0.14159	0.16022	0.16313	0.14581	0.075317	0.18792	0.18774	0.19701	0.14184	0.20846	0.19418	0.22756
K	0.2425	0.20267	0.20921	0.2157	0.04445	0.044558	0.043975	0.04495	0.12924	0.11647	0.10651	0.095667
	128	64	32	16	128	64	32	16	128	64	32	16	FLC
Cg6
MPA	1	2	3	4	5	6	7	8	9	10	11	12
0	0.11471	0.14189	0.19094	0.2316	0.13415	0.1488	0.20547	0.22599	0.13588	0.17671	0.20367	0.26976
2	0.11148	0.13824	0.17846	0.22695	0.11443	0.14388	0.18574	0.23237	0.081825	0.16347	0.19313	0.24919
4	0.11108	0.13487	0.17982	0.22199	0.094133	0.15136	0.20402	0.23811	0.081958	0.16262	0.19808	0.24765
8	0.0902	0.10636	0.16129	0.19285	0.091642	0.1351	0.17443	0.21395	0.0779	0.14911	0.18907	0.22187
16	0.090075	0.12182	0.19619	0.23558	0.13207	0.15659	0.22014	0.2242	0.061425	0.17136	0.22013	0.24108
32	0.088792	0.14902	0.20919	0.22413	0.063825	0.15526	0.21861	0.25462	0.069575	0.14647	0.2279	0.27087
64	0.082575	0.19133	0.19974	0.20785	0.074742	0.19844	0.21209	0.23485	0.066833	0.22648	0.22569	0.24692
K	0.26823	0.25846	0.2501	0.2697	0.04485	0.044792	0.044808	0.045442	0.084533	0.090717	0.10089	0.08455
	256	128	64	32	256	128	64	32	256	128	64	32	FLC
Sc1
MPA	1	2	3	4	5	6	7	8	9	10	11	12
0	0.0889	0.091625	0.13593	0.16193	0.075692	0.088458	0.15212	0.21205	0.080792	0.11537	0.15976	0.21696
2	0.086267	0.11884	0.16433	0.21428	0.089508	0.13893	0.16949	0.19157	0.080875	0.14279	0.17358	0.19008
4	0.070317	0.11422	0.1716	0.16822	0.077608	0.14001	0.17527	0.18593	0.0802	0.16788	0.19788	0.19853
8	0.07725	0.11109	0.16643	0.17643	0.07975	0.11927	0.17927	0.19458	0.079625	0.14635	0.16884	0.18233
16	0.069525	0.14125	0.17304	0.18588	0.0854	0.15528	0.17737	0.18827	0.076525	0.17018	0.20662	0.20703
32	0.080642	0.15927	0.17671	0.18377	0.067667	0.15658	0.17942	0.19592	0.078492	0.18082	0.19221	0.19582
64	0.0822	0.17262	0.15888	0.16446	0.077458	0.16195	0.18738	0.19514	0.065625	0.17811	0.17242	0.19082
K	0.2129	0.18806	0.20772	0.20969	0.042975	0.042067	0.04265	0.043083	0.11263	0.10151	0.091825	0.085225
	4	2	1	0.5	4	2	1	0.5	4	2	1	0.5	ITC
Sc2
MPA	1	2	3	4	5	6	7	8	9	10	11	12
0	0.094833	0.11483	0.15652	0.15822	0.085883	0.11602	0.17405	0.1725	0.091558	0.13812	0.16342	0.18964
2	0.080058	0.10684	0.15839	0.16097	0.0807	0.12296	0.16062	0.16853	0.099383	0.11673	0.15347	0.17272
4	0.078875	0.10355	0.15352	0.17068	0.087525	0.11527	0.16067	0.18548	0.095233	0.12032	0.17389	0.16824
8	0.098925	0.10097	0.16023	0.16121	0.087	0.10192	0.16202	0.17591	0.10865	0.10795	0.15613	0.1833
16	0.086942	0.12213	0.14843	0.1696	0.083817	0.13059	0.17855	0.19283	0.087817	0.11289	0.17685	0.17591
32	0.12	0.10993	0.14362	0.17878	0.11418	0.14449	0.17277	0.18224	0.11422	0.15209	0.17517	0.17557
64	0.11382	0.10222	0.141	0.15405	0.13965	0.16785	0.16086	0.1885	0.13492	0.13639	0.17021	0.18467
K	0.20425	0.18492	0.20534	0.20423	0.042483	0.042883	0.042783	0.043833	0.10501	0.11905	0.10534	0.0945
	256	128	64	32	256	128	64	32	256	128	64	32	ITC
Sc3
MPA	1	2	3	4	5	6	7	8	9	10	11	12
0	0.10246	0.068583	0.13127	0.193	0.064108	0.095958	0.1369	0.18638	0.059908	0.097783	0.18644	0.24023
2	0.081567	0.087183	0.11172	0.18135	0.064992	0.091058	0.10866	0.19718	0.082758	0.10097	0.14352	0.23461
4	0.067833	0.095267	0.13448	0.18628	0.082533	0.094017	0.17821	0.20144	0.08585	0.097275	0.17795	0.22036
8	0.079908	0.066442	0.13688	0.17971	0.081642	0.10077	0.15847	0.19044	0.11633	0.11243	0.17494	0.21073
16	0.085017	0.10355	0.1609	0.18335	0.074767	0.12322	0.16251	0.19354	0.0791	0.10952	0.16122	0.21201
32	0.0972	0.083408	0.183	0.17788	0.078683	0.10823	0.17261	0.20527	0.088867	0.12382	0.16619	0.23553
64	0.1018	0.10371	0.15845	0.18392	0.083942	0.12684	0.17101	0.19267	0.080683	0.12099	0.19146	0.21113
K	0.21837	0.21365	0.21314	0.20581	0.043692	0.0447	0.045067	0.045458	0.11981	0.12947	0.10673	0.11211
	8	4	2	1	8	4	2	1	8	4	2	1	ITC
Sc4
MPA	1	2	3	4	5	6	7	8	9	10	11	12
0	0.094525	0.1257	0.21751	0.20017	0.082425	0.10158	0.21375	0.21014	0.078783	0.11184	0.20327	0.25382
2	0.0805	0.0928	0.21337	0.19796	0.082042	0.071592	0.14813	0.19925	0.065825	0.088208	0.17228	0.24861
4	0.07465	0.080867	0.1803	0.20643	0.078708	0.058642	0.17667	0.22987	0.08095	0.077675	0.19367	0.22519
8	0.061225	0.061808	0.108	0.20462	0.073492	0.07195	0.18365	0.21452	0.066692	0.086392	0.20271	0.22761
16	0.07595	0.17167	0.22154	0.20737	0.091367	0.0835	0.20462	0.22799	0.074775	0.096983	0.19774	0.24221
32	0.098258	0.073475	0.15483	0.18427	0.070908	0.072375	0.18243	0.22444	0.078258	0.12083	0.15949	0.22583
64	0.09325	0.077867	0.096475	0.18085	0.063775	0.079367	0.13179	0.21819	0.058517	0.084667	0.10299	0.22432
K	0.26049	0.23787	0.23496	0.22248	0.043192	0.043642	0.042733	0.043092	0.12639	0.13463	0.11238	0.10604
	2	1	0.5	0.25	2	1	0.5	0.25	2	1	0.5	0.25	ITC
Sc5
MPA	1	2	3	4	5	6	7	8	9	10	11	12
0	0.06245	0.080525	0.17987	0.19503	0.061767	0.087642	0.17394	0.19673	0.08635	0.10231	0.18488	0.21876
2	0.064408	0.10014	0.19429	0.20373	0.067625	0.091442	0.19082	0.20156	0.080758	0.12263	0.19877	0.1959
4	0.071308	0.1122	0.19027	0.20457	0.070617	0.10587	0.19762	0.22272	0.076017	0.11611	0.21264	0.20069
8	0.065608	0.10049	0.22142	0.1941	0.076225	0.14794	0.20685	0.21843	0.069175	0.14486	0.21426	0.21127
16	0.062692	0.12147	0.20493	0.19381	0.071383	0.12372	0.19972	0.20603	0.074858	0.15013	0.21966	0.20872
32	0.075242	0.15266	0.20197	0.18728	0.089833	0.17941	0.18584	0.19344	0.092208	0.19341	0.22102	0.21083
64	0.10258	0.17941	0.15458	0.15337	0.088917	0.18561	0.17128	0.17462	0.095683	0.20153	0.18487	0.18174
K	0.24453	0.2361	0.21001	0.22742	0.043608	0.043408	0.043875	0.044608	0.1096	0.11025	0.13453	0.11326
	4	2	1	0.5	4	2	1	0.5	4	2	1	0.5	ITC
Sc6
MPA	1	2	3	4	5	6	7	8	9	10	11	12
0	0.081467	0.075	0.15315	0.15266	0.05295	0.11531	0.15163	0.17396	0.068642	0.0786	0.15609	0.21576
2	0.074392	0.086217	0.15535	0.16198	0.051883	0.085317	0.16971	0.16935	0.0655	0.093183	0.15067	0.1889
4	0.07175	0.12338	0.16533	0.18213	0.052833	0.10172	0.19058	0.19905	0.057742	0.1096	0.19181	0.18494
8	0.073467	0.085592	0.19403	0.18637	0.065667	0.082275	0.17655	0.19159	0.064025	0.092425	0.15067	0.18642
16	0.080033	0.079433	0.17002	0.16043	0.066408	0.087025	0.18174	0.18574	0.058708	0.086342	0.16284	0.19782
32	0.085567	0.062342	0.16459	0.1496	0.06915	0.073933	0.12891	0.1624	0.079917	0.085792	0.13898	0.19154
64	0.085442	0.06225	0.063667	0.10505	0.074158	0.075383	0.078492	0.09285	0.077308	0.082708	0.088208	0.09905
K	0.22226	0.17516	0.18568	0.20002	0.041975	0.041883	0.042158	0.042167	0.10834	0.12096	0.10327	0.10078
	32	16	8	4	32	16	8	4	32	16	8	4	ITC
Cg2
MPA	1	2	3	4	5	6	7	8	9	10	11	12
0	0.11627	0.13547	0.16661	0.1868	0.095442	0.16573	0.17696	0.1988	0.12639	0.1711	0.17141	0.2216
2	0.10294	0.13225	0.15329	0.17357	0.077367	0.1392	0.15782	0.16735	0.090167	0.14447	0.15482	0.18958
4	0.095892	0.15186	0.15472	0.17867	0.093583	0.15008	0.1683	0.17228	0.08535	0.15483	0.16804	0.18326
8	0.091908	0.1527	0.16597	0.17762	0.077475	0.16957	0.17569	0.18826	0.077983	0.17744	0.17564	0.18129
16	0.096725	0.16694	0.18782	0.17718	0.084467	0.18348	0.18846	0.19507	0.080533	0.19311	0.18856	0.20192
32	0.098975	0.17335	0.18501	0.18486	0.092583	0.17696	0.18255	0.18802	0.092083	0.18039	0.18711	0.20583
64	0.10264	0.17553	0.17151	0.17924	0.090383	0.17164	0.17801	0.18632	0.094583	0.18091	0.18779	0.19357
K	0.27166	0.2361	0.22875	0.23788	0.044133	0.044658	0.045367	0.044558	0.11959	0.13148	0.11342	0.10482
	1	0.5	0.25	0.125	1	0.5	0.25	0.125	1	0.5	0.25	0.125	ITC
Cg3
MPA	1	2	3	4	5	6	7	8	9	10	11	12
0	0.11851	0.10208	0.14445	0.14647	0.11635	0.11178	0.14791	0.16765	0.096817	0.11501	0.14843	0.19782
2	0.082833	0.078575	0.12502	0.15929	0.078142	0.10327	0.14008	0.1501	0.09095	0.10636	0.12972	0.17087
4	0.08315	0.092983	0.12699	0.15177	0.074025	0.10672	0.14519	0.17661	0.085592	0.1067	0.15162	0.17447
8	0.079717	0.097492	0.13927	0.15528	0.09845	0.10872	0.13819	0.16238	0.074367	0.11933	0.15246	0.17318
16	0.082167	0.10833	0.15325	0.16761	0.10932	0.12371	0.16199	0.17221	0.08015	0.12866	0.17642	0.18428
32	0.10358	0.12458	0.16934	0.17404	0.12409	0.13497	0.16827	0.19182	0.09235	0.15359	0.18467	0.18286
64	0.10934	0.11868	0.14983	0.16593	0.11317	0.15313	0.16767	0.18641	0.12829	0.15471	0.18348	0.20136
K	0.25099	0.23333	0.25885	0.23805	0.042533	0.043158	0.042967	0.04305	0.1148	0.11738	0.11217	0.11494
	2	1	0.5	0.25	2	1	0.5	0.25	2	1	0.5	0.25	ITC
Cg4
MPA	1	2	3	4	5	6	7	8	9	10	11	12
0	0.0913	0.11734	0.1422	0.20685	0.077525	0.11266	0.15107	0.18987	0.11964	0.11494	0.15538	0.22113
2	0.07775	0.087808	0.14078	0.15178	0.077117	0.12787	0.15403	0.17889	0.088608	0.13296	0.1464	0.19828
4	0.064583	0.080808	0.13801	0.15	0.07685	0.087333	0.15054	0.18337	0.077475	0.094517	0.15869	0.19707
8	0.065067	0.088058	0.14744	0.15272	0.067308	0.1016	0.15754	0.16692	0.066308	0.091542	0.17332	0.17659
16	0.080675	0.086792	0.15217	0.16055	0.072833	0.10045	0.17454	0.19119	0.08215	0.14596	0.17032	0.20899
32	0.084292	0.12834	0.14288	0.15562	0.068975	0.1382	0.16743	0.18165	0.072975	0.15527	0.16232	0.18042
64	0.10182	0.15024	0.15727	0.15637	0.067717	0.16207	0.17673	0.18542	0.059333	0.16305	0.18053	0.19113
K	0.2938	0.27462	0.26882	0.2483	0.046017	0.045758	0.045908	0.046483	0.12722	0.12515	0.11377	0.11317
	2	1	0.5	0.25	2	1	0.5	0.25	2	1	0.5	0.25	ITC
Cg5
MPA	1	2	3	4	5	6	7	8	9	10	11	12
0	0.12928	0.17006	0.17822	0.2501	0.11902	0.12006	0.18932	0.18992	0.11924	0.1616	0.17157	0.24182
2	0.11295	0.10363	0.15968	0.17083	0.11487	0.1047	0.12434	0.19014	0.13791	0.1679	0.13195	0.21528
4	0.10652	0.14065	0.17447	0.17798	0.13937	0.10633	0.14613	0.20761	0.14398	0.17217	0.18884	0.23378
8	0.1306	0.13995	0.14551	0.16922	0.15686	0.15109	0.15367	0.19696	0.16812	0.16475	0.14987	0.21887
16	0.12023	0.14958	0.10485	0.13998	0.13597	0.15322	0.1725	0.16415	0.14712	0.13781	0.1301	0.2075
32	0.14133	0.11757	0.12382	0.16793	0.14589	0.14816	0.16248	0.19109	0.13928	0.15857	0.15367	0.19596
64	0.14082	0.13523	0.12404	0.14524	0.11894	0.14773	0.1855	0.17742	0.15987	0.16252	0.17392	0.19563
K	0.23857	0.22663	0.23077	0.22629	0.044158	0.043975	0.044117	0.044192	0.11861	0.10549	0.10288	0.11083
	8	4	2	1	8	4	2	1	8	4	2	1	ITC
Cg6
MPA	1	2	3	4	5	6	7	8	9	10	11	12
0	0.19978	0.22253	0.24523	0.23549	0.18557	0.22664	0.24097	0.25091	0.188	0.23885	0.23984	0.25629
2	0.16621	0.16922	0.20838	0.21119	0.16168	0.20147	0.21822	0.24248	0.15665	0.24629	0.22561	0.25553
4	0.15371	0.15975	0.21596	0.22733	0.14638	0.22473	0.22303	0.23312	0.15281	0.23501	0.24292	0.2471
8	0.15523	0.17187	0.20717	0.20791	0.14333	0.21072	0.22314	0.22444	0.15063	0.24409	0.23877	0.25273
16	0.15499	0.18125	0.20719	0.21846	0.15777	0.20597	0.24185	0.24132	0.1905	0.23717	0.23389	0.24797
32	0.15182	0.18012	0.1685	0.18012	0.17902	0.19651	0.22182	0.2138	0.17271	0.20581	0.19624	0.21144
64	0.1615	0.18084	0.18665	0.17781	0.18557	0.19275	0.2025	0.21631	0.18642	0.20318	0.20277	0.23447
K	0.26425	0.22851	0.24109	0.23518	0.042717	0.043025	0.044425	0.043067	0.097842	0.12312	0.11096	0.11268
	32	16	8	4	32	16	8	4	32	16	8	4	ITC
Sc1
MPA	1	2	3	4	5	6	7	8	9	10	11	12
0	0.0952	0.21245	0.18452	0.1796	0.10068	0.19794	0.19156	0.21438	0.10489	0.20565	0.20087	0.20896
2	0.080592	0.18419	0.19582	0.20238	0.099283	0.18622	0.23264	0.20387	0.10638	0.23754	0.22223	0.21358
4	0.081933	0.20034	0.18967	0.21471	0.1223	0.19321	0.21554	0.21167	0.085733	0.21772	0.22944	0.225
8	0.073792	0.15369	0.21494	0.20374	0.086075	0.15737	0.22144	0.23373	0.0859	0.22132	0.22078	0.23934
16	0.07165	0.061117	0.22588	0.20539	0.06635	0.076733	0.21187	0.22413	0.073642	0.14252	0.20606	0.20952
32	0.064483	0.044983	0.085158	0.1998	0.061133	0.051258	0.11659	0.20135	0.0668	0.052792	0.15846	0.26979
64	0.066483	0.054758	0.044342	0.14232	0.0658	0.069467	0.082433	0.19188	0.064417	0.061675	0.10425	0.25244
K	0.2327	0.22017	0.19714	0.20973	0.041217	0.040708	0.041558	0.041925	0.073825	0.0763	0.092758	0.077767
	0.5	0.25	0.125	0.0625	0.5	0.25	0.125	0.0625	0.5	0.25	0.125	0.0625	AMB
Sc2
MPA	1	2	3	4	5	6	7	8	9	10	11	12
0	0.19088	0.18798	0.18987	0.17828	0.20749	0.19034	0.18388	0.20147	0.17098	0.22188	0.19935	0.20088
2	0.20347	0.19292	0.19695	0.20818	0.18264	0.20379	0.20822	0.19933	0.23012	0.22342	0.2175	0.21358
4	0.16382	0.18	0.16983	0.18278	0.15348	0.18489	0.20157	0.21201	0.18489	0.22394	0.22033	0.22594
8	0.17083	0.18857	0.20081	0.21097	0.19088	0.22247	0.22157	0.22345	0.19582	0.22681	0.23082	0.20828
16	0.17777	0.19494	0.18538	0.19482	0.15458	0.20618	0.20524	0.2177	0.18737	0.21298	0.20944	0.22116
32	0.14245	0.18246	0.19105	0.22125	0.13361	0.20919	0.20457	0.21908	0.14343	0.20843	0.22266	0.24256
64	0.094883	0.1644	0.19623	0.17993	0.09055	0.20252	0.20608	0.20715	0.10865	0.22082	0.23583	0.22667
K	0.22469	0.1917	0.2111	0.19374	0.041583	0.041475	0.042067	0.041917	0.080908	0.083142	0.080083	0.08325
	0.25	0.125	0.0625	0.03125	0.25	0.125	0.0625	0.03125	0.25	0.125	0.0625	0.03125	AMB
Sc3
MPA	1	2	3	4	5	6	7	8	9	10	11	12
0	0.19702	0.17892	0.18597	0.16183	0.16384	0.17934	0.1726	0.1778	0.17978	0.17828	0.19758	0.20501
2	0.17934	0.15878	0.16365	0.17075	0.16904	0.18426	0.19543	0.19922	0.18127	0.18393	0.18093	0.17492
4	0.21538	0.20552	0.20385	0.18849	0.18285	0.19982	0.20865	0.20984	0.20142	0.23972	0.21453	0.22583
8	0.17429	0.21865	0.20112	0.20753	0.18075	0.21743	0.20247	0.22919	0.19292	0.22855	0.20653	0.20941
16	0.16466	0.20773	0.20809	0.19987	0.15763	0.21003	0.20712	0.21629	0.16637	0.22323	0.21019	0.21689
32	0.15152	0.15787	0.17282	0.17914	0.14489	0.17199	0.17343	0.18024	0.10865	0.18116	0.18529	0.20359
64	0.15544	0.18392	0.16882	0.17959	0.14367	0.18702	0.18192	0.20766	0.16338	0.20159	0.20633	0.19809
K	0.19224	0.19079	0.17468	0.18456	0.043525	0.043958	0.044592	0.0447	0.088283	0.094383	0.093392	0.082333
	0.125	0.0625	0.03125	0.015625	0.125	0.0625	0.03125	0.015625	0.125	0.0625	0.03125	0.015625	AMB
Sc5
MPA	1	2	3	4	5	6	7	8	9	10	11	12
0	0.19612	0.1976	0.19733	0.19058	0.16947	0.18852	0.20694	0.2055	0.19726	0.21834	0.21144	0.25145
2	0.19402	0.17515	0.20373	0.18602	0.1914	0.21129	0.20837	0.22293	0.19488	0.24373	0.22479	0.24457
4	0.17828	0.19018	0.19251	0.17264	0.19234	0.20191	0.20486	0.22118	0.19392	0.23257	0.21338	0.20963
8	0.16055	0.17505	0.17619	0.15934	0.17642	0.18299	0.20358	0.18179	0.15453	0.19785	0.20012	0.18711
16	0.15274	0.21127	0.20068	0.18481	0.162	0.20553	0.2378	0.22017	0.13075	0.23416	0.23832	0.23356
32	0.12113	0.17693	0.18263	0.17151	0.14556	0.19687	0.20987	0.22217	0.10664	0.20103	0.20836	0.22589
64	0.086192	0.13181	0.14185	0.14069	0.071058	0.15838	0.16859	0.17728	0.075533	0.16011	0.1703	0.18002
K	0.22244	0.2136	0.21107	0.18977	0.041933	0.041792	0.041917	0.042475	0.090183	0.08385	0.080908	0.0751
	0.125	0.0625	0.03125	0.015625	0.125	0.0625	0.03125	0.015625	0.125	0.0625	0.03125	0.015625	AMB
Sc6
MPA	1	2	3	4	5	6	7	8	9	10	11	12
0	0.19518	0.22287	0.21913	0.20919	0.19673	0.21684	0.20752	0.20905	0.20612	0.21273	0.21147	0.25293
2	0.19412	0.2041	0.22864	0.18922	0.19348	0.21856	0.19851	0.20913	0.20865	0.25289	0.20812	0.23645
4	0.17756	0.20921	0.19923	0.22085	0.19935	0.20583	0.22981	0.24142	0.20514	0.24299	0.23545	0.23246
8	0.18582	0.19813	0.19635	0.21421	0.18758	0.20583	0.21633	0.21531	0.17304	0.25717	0.23515	0.22735
16	0.16562	0.18347	0.1702	0.19177	0.16395	0.23607	0.24643	0.22734	0.13749	0.20639	0.21058	0.21418
32	0.099242	0.16093	0.15188	0.17282	0.054692	0.16513	0.18338	0.1904	0.11292	0.19429	0.17988	0.16367
64	0.084075	0.11057	0.094108	0.068825	0.0601	0.092767	0.090575	0.10902	0.056217	0.10959	0.11767	0.090858
K	0.21868	0.23374	0.23602	0.17864	0.045167	0.044983	0.04505	0.044992	0.08645	0.090875	0.090667	0.081492
	0.0625	0.03125	0.015625	0.0078125	0.0625	0.03125	0.015625	0.0078125	0.0625	0.03125	0.015625	0.0078125	AMB
Cg1
MPA	1	2	3	4	5	6	7	8	9	10	11	12
0	0.20764	0.21633	0.25238	0.2198	0.17045	0.1988	0.23261	0.24088	0.17861	0.21045	0.22108	0.27201
2	0.17572	0.17741	0.21024	0.19122	0.16331	0.21035	0.20418	0.2148	0.16262	0.21063	0.21823	0.2531
4	0.1549	0.17336	0.18871	0.1849	0.16958	0.20313	0.20349	0.23245	0.17468	0.20909	0.21341	0.2174
8	0.1631	0.16688	0.18582	0.20494	0.16747	0.19976	0.20854	0.20044	0.16367	0.21564	0.22262	0.2518
16	0.16505	0.15349	0.18848	0.20252	0.17592	0.18943	0.23127	0.22444	0.1805	0.22892	0.21787	0.2458
32	0.14294	0.15776	0.17076	0.18057	0.15422	0.18311	0.21113	0.21399	0.17153	0.2107	0.19998	0.22978
64	0.067492	0.16539	0.16485	0.16452	0.060592	0.16911	0.19392	0.20626	0.061125	0.16937	0.19192	0.20302
K	0.24692	0.23767	0.2382	0.21903	0.043292	0.042892	0.044483	0.043825	0.088667	0.085167	0.083308	0.081025
	0.25	0.125	0.0625	0.03125	0.25	0.125	0.0625	0.03125	0.25	0.125	0.0625	0.03125	AMB
Cg2
MPA	1	2	3	4	5	6	7	8	9	10	11	12
0	0.16389	0.18118	0.1858	0.19633	0.16745	0.18248	0.20351	0.20239	0.16013	0.20087	0.20473	0.23293
2	0.16466	0.19346	0.17676	0.19764	0.1617	0.19784	0.18201	0.19753	0.16799	0.19077	0.18215	0.21368
4	0.1435	0.18119	0.18701	0.18304	0.10727	0.18485	0.19946	0.19287	0.098692	0.20498	0.19256	0.22077
8	0.11616	0.14708	0.17027	0.17471	0.0887	0.18004	0.1831	0.19714	0.096408	0.17922	0.17743	0.18397
16	0.080358	0.17636	0.17523	0.19123	0.089067	0.19495	0.2064	0.20933	0.08475	0.19644	0.20461	0.20981
32	0.084867	0.1077	0.16939	0.18436	0.077775	0.072758	0.19652	0.19643	0.072133	0.10633	0.19937	0.18704
64	0.0773	0.061958	0.065192	0.15862	0.06445	0.063325	0.082008	0.19633	0.065083	0.059417	0.098908	0.17425
K	0.22854	0.21137	0.19549	0.21118	0.044158	0.044783	0.044725	0.045325	0.086225	0.091992	0.085308	0.087025
	0.5	0.25	0.125	0.0625	0.5	0.25	0.125	0.0625	0.5	0.25	0.125	0.0625	AMB
Cg3
MPA	1	2	3	4	5	6	7	8	9	10	11	12
0	0.17569	0.20774	0.22275	0.22775	0.16361	0.21903	0.21909	0.24627	0.17767	0.22164	0.24399	0.25431
2	0.18175	0.21411	0.22626	0.23853	0.18156	0.23577	0.25433	0.24107	0.20474	0.2621	0.25777	0.26687
4	0.17553	0.22628	0.23216	0.24134	0.18107	0.22011	0.23118	0.26973	0.19898	0.23723	0.25898	0.25457
8	0.20222	0.20378	0.22623	0.22147	0.19053	0.21974	0.21317	0.23057	0.18218	0.24827	0.24921	0.23859
16	0.18098	0.2181	0.22701	0.21608	0.18639	0.2178	0.21378	0.22573	0.17311	0.23122	0.24642	0.25424
32	0.1645	0.18434	0.20546	0.20367	0.17402	0.19564	0.20488	0.20314	0.16681	0.20816	0.21078	0.24567
64	0.12676	0.17023	0.18769	0.18225	0.12227	0.18528	0.18553	0.20684	0.12524	0.20368	0.20255	0.21008
K	0.24027	0.22067	0.24594	0.24608	0.048033	0.046825	0.045908	0.0476	0.092025	0.090992	0.08545	0.078542
	0.125	0.0625	0.03125	0.015625	0.125	0.0625	0.03125	0.015625	0.125	0.0625	0.03125	0.015625	AMB
Cg4
MPA	1	2	3	4	5	6	7	8	9	10	11	12
0	0.13082	0.18054	0.17909	0.21398	0.12214	0.18634	0.19872	0.22769	0.10849	0.19789	0.19964	0.25261
2	0.10288	0.18734	0.20491	0.23387	0.11545	0.19779	0.22193	0.24052	0.099033	0.22788	0.23338	0.24905
4	0.090075	0.19902	0.19907	0.23487	0.11044	0.20563	0.22443	0.24132	0.079325	0.23232	0.23898	0.25248
8	0.078508	0.17467	0.22377	0.21226	0.068033	0.20232	0.2117	0.22485	0.075325	0.23038	0.22033	0.24507
16	0.081417	0.16774	0.19619	0.2069	0.060617	0.20146	0.20171	0.21222	0.074442	0.22848	0.21955	0.22657
32	0.076658	0.087958	0.17737	0.19118	0.066825	0.12282	0.18082	0.21296	0.06625	0.15658	0.19196	0.22577
64	0.082533	0.063683	0.12269	0.15587	0.076008	0.072942	0.12187	0.19446	0.0694	0.076408	0.13777	0.19096
K	0.26686	0.2591	0.24224	0.2701	0.044225	0.044117	0.044725	0.045225	0.084383	0.098167	0.099458	0.091517
	0.5	0.25	0.125	0.0625	0.5	0.25	0.125	0.0625	0.5	0.25	0.125	0.0625	AMB
Cg5
MPA	1	2	3	4	5	6	7	8	9	10	11	12
0	0.14105	0.15432	0.17251	0.16951	0.13172	0.16843	0.17284	0.21682	0.15315	0.17657	0.20808	0.18288
2	0.14226	0.15312	0.17066	0.1687	0.12942	0.18708	0.20969	0.21103	0.13111	0.18628	0.2142	0.22003
4	0.12162	0.18151	0.16486	0.17552	0.13313	0.18942	0.2013	0.19643	0.12402	0.20698	0.19722	0.20912
8	0.1049	0.16675	0.18513	0.17954	0.096867	0.18526	0.17832	0.19324	0.089183	0.17483	0.17645	0.19615
16	0.081867	0.17127	0.1849	0.17664	0.0696	0.17652	0.17488	0.19262	0.069967	0.16604	0.17522	0.19493
32	0.075975	0.13222	0.15487	0.15722	0.060217	0.14822	0.1571	0.1761	0.069908	0.16588	0.16671	0.18862
64	0.0753	0.069033	0.13005	0.14495	0.065758	0.068383	0.15186	0.18168	0.057783	0.10805	0.13988	0.17735
K	0.24133	0.19625	0.22111	0.22392	0.0448	0.0452	0.04505	0.045242	0.084325	0.092983	0.076667	0.07735
	0.5	0.25	0.125	0.0625	0.5	0.25	0.125	0.0625	0.5	0.25	0.125	0.0625	AMB
Cg6
MPA	1	2	3	4	5	6	7	8	9	10	11	12
0	0.19645	0.23215	0.25507	0.25212	0.18217	0.21614	0.22667	0.25473	0.18742	0.23032	0.24525	0.25161
2	0.18147	0.21799	0.20889	0.19916	0.16522	0.21302	0.24257	0.24998	0.17681	0.22658	0.20832	0.25228
4	0.1636	0.20522	0.2031	0.20733	0.17532	0.21697	0.23743	0.25078	0.18447	0.23516	0.23412	0.27259
8	0.16815	0.18492	0.20042	0.20505	0.15824	0.20653	0.20201	0.21882	0.15813	0.23013	0.22617	0.2611
16	0.16304	0.19033	0.1921	0.1903	0.15231	0.17318	0.21054	0.1992	0.14713	0.22277	0.22055	0.25513
32	0.15814	0.15908	0.19634	0.18627	0.14767	0.17742	0.19277	0.20396	0.13403	0.20415	0.19468	0.23743
64	0.11427	0.17022	0.17258	0.16106	0.088742	0.18652	0.19057	0.2043	0.088625	0.167	0.18401	0.21221
K	0.27701	0.25635	0.25054	0.23713	0.045217	0.044142	0.044808	0.044767	0.080108	0.075883	0.074558	0.076575
	0.125	0.0625	0.03125	0.015625	0.125	0.0625	0.03125	0.015625	0.125	0.0625	0.03125	0.015625	AMB
Sc1
MTX	1	2	3	4	5	6	7	8	9	10	11	12
0	0.13791	0.19014	0.18012	0.19212	0.12377	0.17672	0.20465	0.19893	0.14447	0.20255	0.193	0.19187
2	0.10711	0.20461	0.20293	0.2121	0.11739	0.20581	0.19312	0.20274	0.15528	0.20439	0.1951	0.20359
4	0.1075	0.20403	0.19537	0.20515	0.10821	0.1882	0.20733	0.21166	0.13868	0.22167	0.22168	0.20066
8	0.1027	0.18993	0.20077	0.20813	0.10946	0.17748	0.21393	0.21053	0.16803	0.21013	0.20254	0.19527
16	0.1141	0.2026	0.18527	0.20243	0.11022	0.18468	0.19213	0.21428	0.1482	0.21008	0.22722	0.21852
32	0.15283	0.19504	0.1832	0.21464	0.14007	0.17844	0.19382	0.21746	0.15548	0.22236	0.22317	0.21333
64	0.16744	0.19257	0.19926	0.16565	0.15362	0.17349	0.18534	0.21526	0.15761	0.1971	0.19673	0.22962
K	0.23805	0.22457	0.22208	0.22377	0.04135	0.041192	0.041517	0.042375	0.087892	0.081783	0.081192	0.060367
	0.5	0.25	0.125	0.0625	0.5	0.25	0.125	0.0625	0.5	0.25	0.125	0.0625	AMB
Sc2
MTX	1	2	3	4	5	6	7	8	9	10	11	12
0	0.19982	0.19177	0.18864	0.19131	0.19788	0.19131	0.17775	0.20748	0.19848	0.21685	0.20715	0.20562
2	0.22508	0.21017	0.21698	0.21033	0.20653	0.21416	0.21263	0.21581	0.24411	0.21751	0.20153	0.21098
4	0.21676	0.19384	0.21972	0.22019	0.19898	0.21265	0.23027	0.23513	0.23221	0.21824	0.2102	0.20829
8	0.19626	0.21068	0.22959	0.22198	0.22119	0.20581	0.20829	0.2266	0.22322	0.21741	0.21294	0.19688
16	0.22212	0.22159	0.19815	0.21036	0.1966	0.22797	0.22662	0.22613	0.22626	0.22257	0.23669	0.23261
32	0.23037	0.20672	0.20069	0.23099	0.19093	0.21418	0.24091	0.22944	0.22988	0.24356	0.21962	0.23598
64	0.19643	0.20893	0.22482	0.20125	0.19469	0.20498	0.21067	0.22406	0.22805	0.23378	0.22981	0.23234
K	0.22233	0.21459	0.22663	0.20635	0.044267	0.044592	0.0439	0.043575	0.067533	0.073267	0.064692	0.064075
	0.25	0.125	0.0625	0.03125	0.25	0.125	0.0625	0.03125	0.25	0.125	0.0625	0.03125	AMB
Sc3
MTX	1	2	3	4	5	6	7	8	9	10	11	12
0	0.2155	0.17846	0.20011	0.17677	0.17761	0.19628	0.19071	0.20446	0.20297	0.21086	0.20406	0.2213
2	0.17155	0.21637	0.21133	0.20757	0.19508	0.2061	0.22978	0.22562	0.20835	0.25031	0.22961	0.22207
4	0.20348	0.20735	0.21358	0.22737	0.21376	0.20417	0.2399	0.24111	0.20202	0.23262	0.24011	0.21646
8	0.21026	0.19065	0.21879	0.21948	0.2126	0.24486	0.22427	0.22972	0.21278	0.25419	0.24681	0.22237
16	0.20872	0.19477	0.22385	0.21232	0.2048	0.23498	0.22527	0.21214	0.23046	0.26524	0.2493	0.20824
32	0.22516	0.19548	0.18923	0.19989	0.20949	0.21078	0.20815	0.2026	0.22398	0.22561	0.24256	0.23842
64	0.23582	0.207	0.16648	0.19157	0.18725	0.19008	0.20175	0.20884	0.21139	0.21165	0.19568	0.20365
K	0.28188	0.22866	0.22032	0.24104	0.043183	0.043125	0.043475	0.044317	0.059758	0.061225	0.076792	0.073267
	0.125	0.0625	0.03125	0.015625	0.125	0.0625	0.03125	0.015625	0.125	0.0625	0.03125	0.015625	AMB
Sc5
MTX	1	2	3	4	5	6	7	8	9	10	11	12
0	0.22467	0.23572	0.21514	0.23417	0.21809	0.23593	0.22702	0.24595	0.21279	0.23182	0.22266	0.25176
2	0.19131	0.21185	0.23113	0.23369	0.19885	0.20666	0.22353	0.2215	0.19992	0.22679	0.22211	0.23074
4	0.20217	0.21315	0.21313	0.22592	0.19828	0.21487	0.22057	0.23673	0.20237	0.22478	0.21528	0.22317
8	0.20231	0.19399	0.22905	0.22045	0.19757	0.21856	0.21806	0.23123	0.21104	0.23472	0.23832	0.25099
16	0.21508	0.1961	0.21813	0.20957	0.19467	0.22723	0.21618	0.23185	0.19983	0.2282	0.22838	0.21118
32	0.21466	0.20763	0.21052	0.21995	0.20586	0.20803	0.21153	0.22752	0.21339	0.23149	0.21063	0.23148
64	0.20938	0.19468	0.1751	0.19015	0.19439	0.19849	0.18726	0.20543	0.18161	0.22657	0.21639	0.20737
K	0.28459	0.25128	0.25078	0.26111	0.044317	0.043833	0.0443	0.0446	0.065242	0.067983	0.081	0.0753
	0.125	0.0625	0.03125	0.015625	0.125	0.0625	0.03125	0.015625	0.125	0.0625	0.03125	0.015625	AMB
Sc6
MTX	1	2	3	4	5	6	7	8	9	10	11	12
0	0.19	0.24104	0.23162	0.20032	0.18615	0.19542	0.22088	0.21107	0.20797	0.23965	0.24846	0.21948
2	0.18618	0.21173	0.23146	0.23248	0.20174	0.21521	0.22718	0.22318	0.21779	0.26049	0.23556	0.26163
4	0.19143	0.21688	0.21611	0.22286	0.21395	0.21073	0.22651	0.25167	0.23492	0.26378	0.25809	0.25199
8	0.17833	0.19098	0.21669	0.1812	0.19835	0.20725	0.21504	0.21169	0.19683	0.23666	0.25925	0.24338
16	0.21087	0.21389	0.21808	0.21428	0.18598	0.2397	0.23992	0.2256	0.23102	0.28227	0.23217	0.24674
32	0.2034	0.20899	0.1906	0.19047	0.23487	0.20718	0.21306	0.21351	0.21093	0.26616	0.22929	0.23919
64	0.13563	0.16327	0.1784	0.15024	0.14344	0.16964	0.16327	0.19849	0.19891	0.21896	0.2109	0.19817
K	0.24349	0.21753	0.24154	0.20425	0.044167	0.043917	0.043933	0.043725	0.063775	0.061717	0.063792	0.070458
	0.0625	0.03125	0.015625	0.0078125	0.0625	0.03125	0.015625	0.0078125	0.0625	0.03125	0.015625	0.0078125	AMB
Cg1
MTX	1	2	3	4	5	6	7	8	9	10	11	12
0	0.20046	0.20079	0.23049	0.22902	0.17151	0.20669	0.22659	0.22988	0.1956	0.19766	0.20752	0.2518
2	0.19142	0.20292	0.21987	0.22774	0.18595	0.21997	0.22132	0.21013	0.19332	0.19784	0.18907	0.22138
4	0.18252	0.20298	0.22226	0.21497	0.17772	0.20462	0.21468	0.21389	0.17303	0.20816	0.20711	0.2265
8	0.18853	0.18786	0.20926	0.20126	0.18616	0.19078	0.19823	0.20377	0.18056	0.19881	0.20302	0.2249
16	0.18457	0.17607	0.19771	0.19765	0.18839	0.18423	0.20302	0.20029	0.17662	0.19526	0.20919	0.23229
32	0.20604	0.16525	0.18739	0.19565	0.17236	0.17822	0.20194	0.19907	0.1947	0.19396	0.20012	0.22484
64	0.1847	0.18092	0.17708	0.18408	0.14243	0.2145	0.21752	0.19849	0.15851	0.18409	0.1942	0.21716
K	0.34344	0.27925	0.27314	0.28747	0.043767	0.043867	0.044	0.045025	0.053008	0.04915	0.050667	0.04785
	0.25	0.125	0.0625	0.03125	0.25	0.125	0.0625	0.03125	0.25	0.125	0.0625	0.03125	AMB
Cg2
MTX	1	2	3	4	5	6	7	8	9	10	11	12
0	0.18896	0.19887	0.20203	0.19312	0.17722	0.19674	0.19645	0.21377	0.18271	0.20433	0.22162	0.22298
2	0.19428	0.19283	0.21148	0.20987	0.17056	0.19875	0.24217	0.23139	0.1954	0.21	0.21505	0.21436
4	0.19187	0.19762	0.20869	0.21487	0.17788	0.20812	0.22418	0.23691	0.19603	0.21515	0.21904	0.20897
8	0.17414	0.17018	0.21127	0.20753	0.17503	0.18162	0.20226	0.19788	0.1847	0.19349	0.20509	0.20852
16	0.20461	0.19205	0.1856	0.17265	0.17302	0.19737	0.20187	0.2069	0.17838	0.19757	0.2183	0.23506
32	0.20073	0.19981	0.20473	0.20583	0.16878	0.18583	0.20365	0.19078	0.18305	0.2075	0.22522	0.2378
64	0.20392	0.17758	0.19059	0.19377	0.17917	0.20053	0.21788	0.21999	0.17577	0.24281	0.2166	0.21929
K	0.30694	0.23375	0.25163	0.2484	0.043192	0.044383	0.043783	0.044617	0.063225	0.068433	0.065975	0.062167
	0.5	0.25	0.125	0.0625	0.5	0.25	0.125	0.0625	0.5	0.25	0.125	0.0625	AMB
Cg3
MTX	1	2	3	4	5	6	7	8	9	10	11	12
0	0.20653	0.22659	0.21762	0.2229	0.14142	0.2099	0.21576	0.2273	0.16539	0.21058	0.23992	0.25429
2	0.18812	0.21408	0.21346	0.22903	0.16795	0.21711	0.20832	0.22838	0.16775	0.21703	0.2169	0.23295
4	0.18286	0.20169	0.22437	0.21722	0.16925	0.21891	0.24027	0.22793	0.17736	0.23313	0.22621	0.23867
8	0.17168	0.18972	0.20301	0.22034	0.17989	0.20788	0.22342	0.23336	0.17562	0.2308	0.23032	0.24225
16	0.1737	0.21207	0.22063	0.21777	0.17033	0.2176	0.22691	0.24019	0.17134	0.20865	0.24296	0.23202
32	0.18661	0.19772	0.20548	0.22664	0.17942	0.20118	0.21903	0.24112	0.17345	0.22419	0.22205	0.23857
64	0.19143	0.21663	0.20886	0.20896	0.17111	0.20239	0.20758	0.23606	0.18323	0.23613	0.23229	0.2239
K	0.26937	0.23239	0.23115	0.22859	0.043433	0.042517	0.042458	0.045967	0.076158	0.079417	0.074	0.060358
	0.125	0.0625	0.03125	0.015625	0.125	0.0625	0.03125	0.015625	0.125	0.0625	0.03125	0.015625	AMB
Cg4
MTX	1	2	3	4	5	6	7	8	9	10	11	12
0	0.15664	0.19798	0.19397	0.226	0.1261	0.17689	0.19323	0.22869	0.15023	0.19877	0.2205	0.23283
2	0.1449	0.17455	0.18586	0.19997	0.13292	0.19358	0.19354	0.23088	0.14096	0.19404	0.18663	0.22377
4	0.13178	0.1906	0.1894	0.23266	0.13419	0.19533	0.22436	0.24402	0.17397	0.21563	0.22683	0.24796
8	0.1335	0.18229	0.21188	0.21598	0.1487	0.1811	0.21738	0.22964	0.14571	0.20622	0.21947	0.23202
16	0.14773	0.18803	0.20137	0.21928	0.1559	0.18618	0.22224	0.23197	0.16614	0.2176	0.22227	0.26235
32	0.13858	0.19128	0.19063	0.22655	0.16504	0.19178	0.24322	0.22751	0.16067	0.20809	0.22627	0.21485
64	0.15069	0.20956	0.19629	0.22211	0.15195	0.20298	0.22678	0.24276	0.16268	0.22272	0.22167	0.24599
K	0.28802	0.25516	0.27293	0.28063	0.042933	0.042458	0.043167	0.043383	0.089483	0.0892	0.082267	0.07085
	0.5	0.25	0.125	0.0625	0.5	0.25	0.125	0.0625	0.5	0.25	0.125	0.0625	AMB
Cg5
MTX	1	2	3	4	5	6	7	8	9	10	11	12
0	0.16097	0.18732	0.18438	0.19627	0.14387	0.17615	0.18087	0.20112	0.15782	0.18947	0.18538	0.21147
2	0.14726	0.16801	0.19101	0.18688	0.15659	0.17453	0.18757	0.1885	0.17579	0.20607	0.18861	0.21396
4	0.14424	0.17472	0.1798	0.19621	0.15774	0.18944	0.20435	0.20635	0.16823	0.2196	0.21241	0.2094
8	0.14277	0.16668	0.19368	0.20154	0.15423	0.19328	0.19931	0.20923	0.18023	0.22752	0.23184	0.23413
16	0.15014	0.16748	0.19862	0.19397	0.1584	0.20297	0.19903	0.20958	0.17039	0.22993	0.21698	0.21758
32	0.15374	0.18729	0.20243	0.20593	0.17443	0.19113	0.20158	0.20927	0.17397	0.21551	0.20678	0.23921
64	0.16394	0.20856	0.19598	0.20069	0.17217	0.21215	0.19417	0.22186	0.17646	0.22185	0.19905	0.22444
K	0.23789	0.23667	0.21416	0.22121	0.043033	0.043483	0.043533	0.043775	0.077725	0.085433	0.0963	0.076392
	0.5	0.25	0.125	0.0625	0.5	0.25	0.125	0.0625	0.5	0.25	0.125	0.0625	AMB
Cg6
MTX	1	2	3	4	5	6	7	8	9	10	11	12
0	0.19265	0.20995	0.2095	0.21997	0.19787	0.2116	0.21508	0.23218	0.18961	0.22786	0.23348	0.26685
2	0.20663	0.20673	0.23154	0.23348	0.19164	0.22996	0.24761	0.24084	0.21094	0.25453	0.23607	0.25034
4	0.19613	0.22941	0.24569	0.2478	0.19221	0.24447	0.25466	0.25688	0.21428	0.26097	0.26367	0.27308
8	0.19416	0.22089	0.24842	0.23692	0.19501	0.25767	0.25978	0.26153	0.20515	0.26775	0.26862	0.26075
16	0.17044	0.20426	0.23073	0.2452	0.19105	0.23744	0.22887	0.23618	0.20592	0.26006	0.24353	0.2378
32	0.17659	0.20931	0.23493	0.24863	0.19861	0.24273	0.25219	0.26356	0.21605	0.25401	0.25063	0.26238
64	0.18282	0.23282	0.21975	0.25169	0.21193	0.22697	0.23034	0.23477	0.21482	0.26923	0.24608	0.26252
K	0.25307	0.23487	0.23599	0.23253	0.04515	0.0453	0.045125	0.046308	0.082233	0.092517	0.11432	0.073717
	0.125	0.0625	0.03125	0.015625	0.125	0.0625	0.03125	0.015625	0.125	0.0625	0.03125	0.015625	AMB
Sc1
MTX	1	2	3	4	5	6	7	8	9	10	11	12
0	0.15764	0.18979	0.24694	0.24346	0.13757	0.1862	0.24953	0.27388	0.14672	0.21986	0.28183	0.29996
2	0.14927	0.18886	0.20914	0.13368	0.14799	0.18037	0.24047	0.27925	0.16803	0.21056	0.27909	0.30949
4	0.12439	0.20553	0.20547	0.119	0.13702	0.15393	0.21097	0.27664	0.14023	0.23335	0.27988	0.27855
8	0.12262	0.1611	0.19847	0.11994	0.13502	0.17032	0.17734	0.23423	0.141	0.21314	0.2768	0.30736
16	0.12323	0.1631	0.17945	0.09755	0.11892	0.12089	0.1385	0.22293	0.12778	0.20423	0.25778	0.27739
32	0.1134	0.13542	0.18483	0.21154	0.12936	0.11697	0.10812	0.15067	0.1122	0.11552	0.19524	0.26711
64	0.10007	0.091425	0.16376	0.22331	0.086233	0.086258	0.095467	0.085142	0.059992	0.062267	0.14539	0.27379
K	0.21679	0.22762	0.23872	0.2045	0.043533	0.043567	0.044008	0.044508	0.094117	0.074883	0.09505	0.10425
	8	4	2	1	8	4	2	1	8	4	2	1	FLC
Sc2
MTX	1	2	3	4	5	6	7	8	9	10	11	12
0	0.12548	0.11506	0.098342	0.17063	0.1149	0.11294	0.11033	0.18678	0.11112	0.11738	0.10302	0.18433
2	0.11129	0.10713	0.11157	0.19477	0.11434	0.11382	0.12307	0.17655	0.12734	0.14578	0.13567	0.19556
4	0.12023	0.1201	0.11887	0.18006	0.11542	0.12125	0.14215	0.19299	0.12065	0.14379	0.13707	0.19692
8	0.11563	0.11298	0.14561	0.18472	0.12023	0.12787	0.13507	0.20482	0.12622	0.14605	0.14423	0.20216
16	0.11402	0.113	0.13709	0.20374	0.11647	0.14217	0.12446	0.21411	0.12342	0.15036	0.16408	0.20096
32	0.11823	0.12855	0.18792	0.22805	0.12623	0.14177	0.19934	0.22109	0.12321	0.14142	0.18289	0.24139
64	0.1076	0.11854	0.16666	0.21861	0.12039	0.12699	0.18283	0.21943	0.099892	0.13598	0.20025	0.2295
K	0.23133	0.22271	0.2126	0.20522	0.0426	0.042408	0.043417	0.043792	0.094492	0.10222	0.11176	0.10984
	128	64	32	16	128	64	32	16	128	64	32	16	FLC
Sc3
MTX	1	2	3	4	5	6	7	8	9	10	11	12
0	0.091125	0.10126	0.13602	0.17203	0.088508	0.1032	0.14833	0.15894	0.080042	0.10205	0.13503	0.19708
2	0.098625	0.12657	0.13976	0.19416	0.065942	0.078908	0.14083	0.17567	0.060042	0.07165	0.14011	0.20589
4	0.0867	0.097792	0.1397	0.19213	0.049825	0.071458	0.13737	0.19082	0.054633	0.057492	0.11323	0.19657
8	0.087342	0.088092	0.1465	0.17617	0.075817	0.10864	0.14446	0.20876	0.067933	0.082183	0.0935	0.21598
16	0.10026	0.081875	0.17407	0.19633	0.07265	0.094742	0.12956	0.19588	0.071367	0.08795	0.092092	0.2007
32	0.10513	0.091558	0.16059	0.21068	0.088392	0.1041	0.13018	0.20183	0.081767	0.081483	0.098333	0.21228
64	0.10987	0.094942	0.12301	0.19303	0.10084	0.10383	0.13119	0.20491	0.082117	0.098192	0.15618	0.20367
K	0.23182	0.201	0.20057	0.20992	0.044742	0.044317	0.045125	0.044983	0.095725	0.10436	0.098208	0.094858
	64	32	16	8	64	32	16	8	64	32	16	8	FLC
Sc4
MTX	1	2	3	4	5	6	7	8	9	10	11	12
0	0.064208	0.046458	0.10686	0.19494	0.041733	0.04105	0.14917	0.21328	0.041567	0.04535	0.12079	0.21544
2	0.046383	0.040567	0.14011	0.22543	0.039858	0.042217	0.14004	0.22079	0.040767	0.0428	0.13402	0.21501
4	0.053725	0.040808	0.12647	0.22405	0.041383	0.045825	0.16355	0.23515	0.038408	0.042183	0.15926	0.19338
8	0.049467	0.041067	0.12474	0.21704	0.043575	0.040808	0.1463	0.23052	0.0408	0.04115	0.13214	0.20042
16	0.048825	0.041292	0.13123	0.22564	0.049475	0.050842	0.13078	0.22412	0.039517	0.040667	0.13793	0.20883
32	0.050308	0.041958	0.1212	0.22886	0.042892	0.043642	0.14047	0.21385	0.04295	0.12623	0.15013	0.20251
64	0.066592	0.047225	0.15159	0.20747	0.062892	0.059817	0.10704	0.24611	0.045583	0.051	0.11702	0.22953
K	0.25483	0.22068	0.23864	0.23042	0.041083	0.041133	0.040775	0.041308	0.088083	0.068042	0.080017	0.078233
	4	2	1	0.5	4	2	1	0.5	4	2	1	0.5	FLC
Sc5
MTX	1	2	3	4	5	6	7	8	9	10	11	12
0	0.067192	0.058858	0.15357	0.19885	0.053208	0.063833	0.12777	0.20515	0.057425	0.061492	0.16125	0.22948
2	0.056467	0.060175	0.19664	0.21723	0.049108	0.12816	0.18115	0.22628	0.053975	0.065217	0.19335	0.21859
4	0.054458	0.046317	0.14953	0.21603	0.053058	0.051717	0.14771	0.23303	0.13092	0.058208	0.18881	0.21737
8	0.052483	0.1073	0.12905	0.19684	0.053083	0.06485	0.14118	0.19616	0.050608	0.058658	0.17744	0.2135
16	0.062033	0.04405	0.12332	0.2021	0.053108	0.053942	0.16227	0.22708	0.055217	0.061292	0.18769	0.23352
32	0.075767	0.048475	0.11119	0.18389	0.056475	0.051075	0.099175	0.20061	0.054867	0.055517	0.18393	0.20707
64	0.082425	0.048958	0.072033	0.16389	0.072442	0.069033	0.070367	0.18493	0.0564	0.15273	0.21632	0.21478
K	0.26245	0.24295	0.26192	0.23453	0.043775	0.043933	0.043892	0.044567	0.09135	0.087058	0.087358	0.083808
	16	8	4	2	16	8	4	2	16	8	4	2	FLC
Sc6
MTX	1	2	3	4	5	6	7	8	9	10	11	12
0	0.095175	0.19762	0.16727	0.17537	0.10572	0.15437	0.18518	0.18673	0.087675	0.16903	0.16751	0.17703
2	0.10046	0.18272	0.19788	0.21623	0.106	0.18013	0.20075	0.21451	0.077517	0.18616	0.21037	0.19907
4	0.096608	0.17188	0.20392	0.21226	0.070683	0.18938	0.21847	0.21247	0.092908	0.20554	0.20951	0.23413
8	0.10121	0.16093	0.22371	0.20671	0.070475	0.17895	0.20796	0.22453	0.089725	0.20911	0.21525	0.21582
16	0.09215	0.16583	0.21332	0.19742	0.0672	0.17754	0.18764	0.20746	0.0796	0.2207	0.22609	0.19882
32	0.10697	0.12924	0.21008	0.17549	0.098375	0.19097	0.20075	0.21878	0.095083	0.19862	0.22729	0.23644
64	0.081833	0.067158	0.14233	0.10863	0.094083	0.11791	0.14665	0.21229	0.1028	0.18853	0.23182	0.20668
K	0.2449	0.25342	0.23422	0.20268	0.044292	0.044492	0.044692	0.044692	0.064608	0.06205	0.075592	0.073617
	16	8	4	2	16	8	4	2	16	8	4	2	FLC
Cg1
MTX	1	2	3	4	5	6	7	8	9	10	11	12
0	0.16367	0.18719	0.19704	0.19923	0.16203	0.1925	0.19905	0.22534	0.15807	0.17522	0.20876	0.23682
2	0.15209	0.15637	0.19128	0.1979	0.14204	0.17528	0.18019	0.20175	0.15398	0.167	0.18284	0.21583
4	0.15291	0.16565	0.19637	0.18298	0.1387	0.17333	0.18848	0.21926	0.14976	0.17251	0.18963	0.21533
8	0.14807	0.14981	0.18166	0.17787	0.14672	0.17686	0.18679	0.21394	0.15331	0.17647	0.18636	0.233
16	0.15348	0.16268	0.17458	0.18307	0.14273	0.16843	0.19468	0.20262	0.15104	0.17286	0.18066	0.23311
32	0.14797	0.13627	0.17383	0.18248	0.13528	0.16332	0.18065	0.18806	0.14893	0.16891	0.18928	0.24397
64	0.16688	0.14868	0.16043	0.18063	0.16305	0.18071	0.21234	0.21747	0.16043	0.18154	0.19206	0.2457
K	0.29556	0.25847	0.25328	0.25661	0.040458	0.041067	0.04095	0.0414	0.085017	0.093425	0.083783	0.090508
	4	2	1	0.5	4	2	1	0.5	4	2	1	0.5	FLC
Cg2
MTX	1	2	3	4	5	6	7	8	9	10	11	12
0	0.10646	0.12526	0.16877	0.19212	0.11513	0.12579	0.16288	0.20864	0.11748	0.12329	0.15926	0.23117
2	0.10104	0.10572	0.17307	0.18537	0.11906	0.10646	0.16794	0.17555	0.1402	0.12127	0.15751	0.22837
4	0.098375	0.11391	0.14358	0.19728	0.13119	0.11342	0.16439	0.18886	0.13891	0.12627	0.15863	0.21188
8	0.11117	0.09545	0.14441	0.17536	0.13508	0.11471	0.17695	0.18692	0.13418	0.13296	0.16432	0.21891
16	0.11838	0.11153	0.15302	0.16996	0.13612	0.13092	0.16775	0.18808	0.13233	0.13449	0.17167	0.21342
32	0.11788	0.12572	0.15039	0.16527	0.13354	0.12989	0.15715	0.17026	0.13196	0.13408	0.15625	0.19474
64	0.1399	0.14249	0.13357	0.17063	0.13669	0.14573	0.15282	0.1897	0.14461	0.15625	0.17806	0.20798
K	0.2619	0.21007	0.24158	0.23549	0.0425	0.044825	0.042842	0.042808	0.10652	0.095217	0.097117	0.086075
	8	4	2	1	8	4	2	1	8	4	2	1	FLC
Cg3
MTX	1	2	3	4	5	6	7	8	9	10	11	12
0	0.14122	0.13257	0.15841	0.18887	0.12063	0.13926	0.17052	0.19841	0.11898	0.1463	0.17618	0.22913
2	0.12904	0.14197	0.16943	0.1896	0.11897	0.13983	0.1454	0.20345	0.11431	0.13425	0.1508	0.20159
4	0.13033	0.14054	0.16487	0.18308	0.11651	0.14462	0.18032	0.20184	0.12182	0.14807	0.1787	0.20166
8	0.12282	0.12716	0.16763	0.19007	0.12618	0.13631	0.16133	0.18441	0.12746	0.14693	0.16285	0.19715
16	0.11712	0.13019	0.16266	0.18435	0.12349	0.1373	0.16476	0.19961	0.1236	0.14978	0.17788	0.20382
32	0.11723	0.1265	0.15083	0.18727	0.12573	0.12967	0.15634	0.19016	0.13307	0.15961	0.18269	0.1945
64	0.14897	0.14844	0.15324	0.17957	0.15238	0.13987	0.16164	0.20135	0.14269	0.16968	0.1778	0.20624
K	0.29033	0.24593	0.2758	0.2379	0.043967	0.041208	0.041933	0.042192	0.09645	0.089292	0.089033	0.087333
	16	8	4	2	16	8	4	2	16	8	4	2	FLC
Cg4
MTX	1	2	3	4	5	6	7	8	9	10	11	12
0	0.16077	0.16678	0.20516	0.2323	0.15247	0.16182	0.18884	0.2349	0.15546	0.17009	0.19408	0.26232
2	0.15123	0.17102	0.19609	0.22526	0.15105	0.18334	0.21213	0.22557	0.15147	0.17752	0.19723	0.24248
4	0.15911	0.17802	0.19713	0.22113	0.15409	0.17717	0.21592	0.24767	0.15785	0.18742	0.21573	0.25644
8	0.16606	0.17646	0.21316	0.22741	0.15701	0.18248	0.21134	0.24852	0.16794	0.20028	0.21001	0.25784
16	0.16405	0.16193	0.21753	0.24031	0.16789	0.19043	0.21898	0.24832	0.17152	0.20739	0.22884	0.26426
32	0.16294	0.17764	0.20116	0.23365	0.15948	0.19151	0.21641	0.25523	0.17467	0.20039	0.22426	0.25497
64	0.16889	0.17532	0.19685	0.22932	0.18238	0.1978	0.21187	0.25318	0.18827	0.20531	0.22973	0.25233
K	0.28798	0.28178	0.28244	0.2698	0.042217	0.041242	0.041892	0.042142	0.098258	0.10265	0.11422	0.10297
	4	2	1	0.5	4	2	1	0.5	4	2	1	0.5	FLC
Cg5
MTX	1	2	3	4	5	6	7	8	9	10	11	12
0	0.10699	0.16564	0.19949	0.21607	0.097325	0.088067	0.21197	0.20805	0.11466	0.16464	0.21348	0.22942
2	0.1026	0.14104	0.1867	0.17702	0.10423	0.16296	0.18334	0.20259	0.11089	0.17063	0.18525	0.232
4	0.086642	0.15464	0.18499	0.18753	0.11664	0.10261	0.19161	0.20828	0.11156	0.1723	0.20528	0.24133
8	0.098992	0.15368	0.1883	0.19574	0.097792	0.16194	0.19598	0.20773	0.096075	0.17955	0.19902	0.22656
16	0.10377	0.15857	0.17327	0.21102	0.11193	0.1751	0.21203	0.22136	0.11239	0.17968	0.20108	0.23509
32	0.10423	0.18414	0.1958	0.19868	0.12435	0.1871	0.20266	0.20518	0.11487	0.19838	0.19123	0.22394
64	0.11057	0.1897	0.19103	0.19356	0.12776	0.20412	0.20657	0.21692	0.11922	0.20924	0.2135	0.23364
K	0.27584	0.25904	0.252	0.22493	0.04295	0.042708	0.043308	0.043142	0.0987	0.095458	0.09415	0.11051
	128	64	32	16	128	64	32	16	128	64	32	16	FLC
Cg6
MTX	1	2	3	4	5	6	7	8	9	10	11	12
0	0.068267	0.10816	0.17887	0.20831	0.071833	0.12119	0.17422	0.21681	0.062933	0.13871	0.18836	0.22773
2	0.051308	0.10835	0.16172	0.20409	0.062225	0.13148	0.16825	0.20702	0.060808	0.1291	0.15176	0.22522
4	0.049867	0.13599	0.17682	0.21158	0.058208	0.14282	0.18525	0.20848	0.0553	0.15097	0.18701	0.21875
8	0.046733	0.090508	0.15942	0.20219	0.062633	0.13026	0.17452	0.20946	0.0584	0.12984	0.16984	0.20054
16	0.044375	0.10212	0.17658	0.20023	0.057167	0.1329	0.17865	0.22237	0.051625	0.10661	0.17882	0.2138
32	0.050425	0.082267	0.17	0.2089	0.058767	0.1309	0.18453	0.22494	0.058475	0.13522	0.17966	0.21761
64	0.053133	0.11055	0.1676	0.18893	0.051233	0.10612	0.18324	0.22493	0.055558	0.1255	0.19471	0.22175
K	0.25497	0.24014	0.24262	0.233	0.041392	0.042092	0.042417	0.042642	0.084542	0.079592	0.091508	0.0855
	256	128	64	32	256	128	64	32	256	128	64	32	FLC
Sc1
MTX	1	2	3	4	5	6	7	8	9	10	11	12
0	0.067242	0.073175	0.18387	0.18301	0.059358	0.077125	0.1839	0.19937	0.080975	0.11129	0.15866	0.1959
2	0.078892	0.068892	0.16757	0.19155	0.069408	0.0641	0.18533	0.18463	0.094933	0.099092	0.17317	0.23571
4	0.062333	0.065925	0.15573	0.18137	0.090117	0.057217	0.182	0.19623	0.081742	0.088133	0.17848	0.20912
8	0.068325	0.074233	0.15925	0.1861	0.0938	0.065092	0.14671	0.18959	0.082058	0.098217	0.18122	0.21741
16	0.08105	0.07175	0.17563	0.1634	0.074275	0.065925	0.17703	0.20088	0.083608	0.091717	0.18733	0.20174
32	0.075258	0.067758	0.13341	0.17046	0.066383	0.070408	0.16907	0.18999	0.076642	0.093567	0.137	0.21481
64	0.066033	0.057625	0.10667	0.17035	0.068908	0.0618	0.13194	0.19076	0.0874	0.087675	0.16465	0.21404
K	0.18904	0.18929	0.22337	0.20847	0.040517	0.041908	0.041875	0.041967	0.078858	0.087233	0.075908	0.07065
	4	2	1	0.5	4	2	1	0.5	4	2	1	0.5	ITC
Sc2
MTX	1	2	3	4	5	6	7	8	9	10	11	12
0	0.10967	0.13685	0.17801	0.21134	0.0854	0.13943	0.19769	0.22093	0.09465	0.16213	0.18397	0.1914
2	0.10556	0.13242	0.20523	0.21044	0.094775	0.13422	0.18708	0.21434	0.079458	0.10969	0.1892	0.20771
4	0.098875	0.11818	0.21565	0.19482	0.082042	0.11977	0.20587	0.22353	0.076175	0.12171	0.20767	0.19776
8	0.10674	0.10806	0.17669	0.19539	0.083192	0.0982	0.20353	0.20853	0.078467	0.10919	0.18475	0.21964
16	0.098575	0.11006	0.20051	0.16886	0.092125	0.10052	0.18356	0.21057	0.0804	0.085992	0.20394	0.22057
32	0.1187	0.12155	0.1738	0.20185	0.088533	0.10662	0.18673	0.20285	0.084908	0.13077	0.18762	0.20486
64	0.10925	0.095467	0.16647	0.18028	0.09095	0.10958	0.18027	0.21318	0.0857	0.12659	0.17854	0.20877
K	0.2369	0.22187	0.22158	0.21647	0.043992	0.044333	0.044583	0.04455	0.085683	0.0827	0.087117	0.063717
	4	2	1	0.5	4	2	1	0.5	4	2	1	0.5	ITC
Sc3
MTX	1	2	3	4	5	6	7	8	9	10	11	12
0	0.068525	0.090025	0.15714	0.16901	0.060908	0.10742	0.1595	0.2071	0.076808	0.10794	0.14253	0.2425
2	0.056108	0.077433	0.11542	0.18846	0.060033	0.089067	0.13965	0.18601	0.076692	0.12486	0.15561	0.22419
4	0.059942	0.093275	0.13929	0.19418	0.069742	0.091083	0.13504	0.20771	0.067542	0.10309	0.16214	0.22287
8	0.071625	0.064242	0.1335	0.19846	0.0651	0.096733	0.10255	0.21423	0.071092	0.10492	0.20564	0.23321
16	0.063508	0.0784	0.15224	0.19064	0.0627	0.10173	0.11906	0.18773	0.092692	0.10822	0.17693	0.22983
32	0.064633	0.068675	0.13549	0.18598	0.072858	0.10723	0.15113	0.19235	0.077308	0.10278	0.17058	0.24632
64	0.077617	0.089783	0.12998	0.17428	0.053808	0.13861	0.13783	0.1969	0.048	0.10322	0.18206	0.22483
K	0.21583	0.19425	0.18648	0.20353	0.044317	0.04485	0.045033	0.045917	0.075267	0.074567	0.089375	0.079975
	8	4	2	1	8	4	2	1	8	4	2	1	ITC
Sc4
MTX	1	2	3	4	5	6	7	8	9	10	11	12
0	0.0668	0.064433	0.10957	0.22315	0.065392	0.069625	0.11715	0.22549	0.081792	0.12667	0.24072	0.24517
2	0.065458	0.053792	0.12505	0.21302	0.061558	0.059658	0.1419	0.21538	0.065675	0.062483	0.16633	0.24605
4	0.063042	0.051742	0.0859	0.21265	0.083117	0.060567	0.0899	0.24	0.1053	0.064333	0.16222	0.24305
8	0.065267	0.048433	0.10804	0.20288	0.075633	0.0579	0.12546	0.19664	0.074075	0.064325	0.1046	0.23471
16	0.073117	0.047975	0.10633	0.20349	0.066008	0.04915	0.13027	0.22007	0.088283	0.063833	0.13496	0.24548
32	0.073292	0.050383	0.085042	0.17948	0.082433	0.058025	0.14452	0.20542	0.06885	0.0761	0.14062	0.23676
64	0.079883	0.064292	0.11448	0.19365	0.079033	0.13275	0.11345	0.21635	0.07495	0.067225	0.1113	0.23563
K	0.27161	0.28487	0.27253	0.25094	0.042675	0.043233	0.043342	0.043375	0.082483	0.088683	0.077383	0.082458
	2	1	0.5	0.25	2	1	0.5	0.25	2	1	0.5	0.25	ITC
Sc5
MTX	1	2	3	4	5	6	7	8	9	10	11	12
0	0.0551	0.0737	0.14613	0.1721	0.057233	0.075667	0.16221	0.18213	0.049933	0.0812	0.16559	0.19524
2	0.060808	0.071117	0.17177	0.19729	0.065475	0.076367	0.17285	0.16302	0.078067	0.082708	0.17996	0.20984
4	0.061567	0.071475	0.15853	0.203	0.062425	0.074533	0.18391	0.19358	0.079583	0.10749	0.18727	0.20641
8	0.0595	0.061292	0.17972	0.19273	0.063508	0.088258	0.1716	0.18722	0.085425	0.083275	0.19006	0.22061
16	0.069608	0.064508	0.1774	0.18674	0.0555	0.0836	0.18078	0.18979	0.068667	0.093817	0.19042	0.20922
32	0.06265	0.070583	0.14755	0.16043	0.0473	0.085817	0.15596	0.16772	0.051875	0.093433	0.17646	0.22386
64	0.057158	0.083442	0.14992	0.16211	0.068925	0.0891	0.15462	0.15923	0.072158	0.10038	0.17177	0.17278
K	0.26037	0.23991	0.2103	0.25106	0.041767	0.041883	0.041942	0.042683	0.0802	0.0825	0.092833	0.078817
	4	2	1	0.5	4	2	1	0.5	4	2	1	0.5	ITC
Sc6
MTX	1	2	3	4	5	6	7	8	9	10	11	12
0	0.087983	0.059875	0.051492	0.050608	0.084875	0.056692	0.050417	0.078408	0.080208	0.080167	0.067933	0.10211
2	0.08135	0.072767	0.064908	0.0581	0.10184	0.083492	0.0777	0.066333	0.11485	0.090183	0.082392	0.11463
4	0.080433	0.069175	0.060975	0.058542	0.094683	0.087825	0.08265	0.065583	0.097933	0.082542	0.081808	0.10671
8	0.077217	0.061058	0.065258	0.0641	0.090667	0.091975	0.0865	0.10038	0.11074	0.10263	0.091842	0.12278
16	0.092217	0.074067	0.055117	0.056358	0.091417	0.083583	0.068583	0.066192	0.11248	0.09715	0.093575	0.10258
32	0.077875	0.064692	0.070375	0.0734	0.092158	0.079683	0.07945	0.080408	0.097433	0.10128	0.084783	0.11114
64	0.1016	0.0777	0.053608	0.080592	0.090158	0.087767	0.069208	0.10524	0.094892	0.0798	0.073367	0.11707
K	0.23318	0.2314	0.23082	0.2665	0.042558	0.042683	0.042742	0.043067	0.067817	0.066125	0.083925	0.079808
	32	16	8	4	32	16	8	4	32	16	8	4	ITC
Cg1
MTX	1	2	3	4	5	6	7	8	9	10	11	12
0	0.11699	0.12531	0.13874	0.17927	0.081517	0.13878	0.15854	0.15141	0.097767	0.14497	0.15866	0.1954
2	0.11468	0.13438	0.14257	0.15522	0.081533	0.15205	0.13418	0.16375	0.1181	0.13508	0.13986	0.17912
4	0.11146	0.15247	0.14227	0.15083	0.10122	0.1517	0.15934	0.17114	0.13468	0.15241	0.15558	0.17867
8	0.11693	0.12063	0.13986	0.14103	0.11509	0.14008	0.14142	0.17287	0.11257	0.15596	0.14393	0.17277
16	0.15208	0.13598	0.16761	0.15154	0.12323	0.14533	0.16077	0.15792	0.12235	0.15388	0.159	0.19375
32	0.15159	0.13088	0.14119	0.14608	0.10658	0.1321	0.14337	0.16555	0.13268	0.15386	0.1492	0.19835
64	0.17859	0.14563	0.14096	0.14278	0.13731	0.15242	0.16798	0.17563	0.12929	0.1532	0.14206	0.18681
K	0.34528	0.27342	0.28312	0.28519	0.043642	0.043333	0.043133	0.044425	0.080242	0.075833	0.083092	0.065042
	1	0.5	0.25	0.125	1	0.5	0.25	0.125	1	0.5	0.25	0.125	ITC
Cg2
MTX	1	2	3	4	5	6	7	8	9	10	11	12
0	0.10853	0.1559	0.2004	0.19038	0.094033	0.16597	0.17729	0.21509	0.11984	0.1465	0.21583	0.21462
2	0.098858	0.13177	0.18517	0.16973	0.10029	0.15968	0.18157	0.18053	0.11968	0.13472	0.20257	0.17823
4	0.10619	0.11684	0.16827	0.16674	0.10637	0.12472	0.16327	0.1771	0.10974	0.13233	0.19788	0.21435
8	0.10692	0.12286	0.17794	0.1846	0.11914	0.15519	0.17559	0.18383	0.12956	0.14684	0.19309	0.20869
16	0.11755	0.13588	0.16491	0.1941	0.11388	0.14267	0.17538	0.20568	0.11669	0.14394	0.18671	0.18829
32	0.11878	0.13024	0.16501	0.16231	0.12282	0.13272	0.17338	0.2355	0.11485	0.15543	0.16459	0.23532
64	0.11755	0.15007	0.15846	0.17497	0.11151	0.15956	0.15602	0.20158	0.11355	0.16755	0.18388	0.20157
K	0.21502	0.22318	0.21702	0.21487	0.045708	0.045275	0.044283	0.047767	0.08975	0.094108	0.10442	0.080008
	1	0.5	0.25	0.125	1	0.5	0.25	0.125	1	0.5	0.25	0.125	ITC
Cg3
MTX	1	2	3	4	5	6	7	8	9	10	11	12
0	0.11368	0.11192	0.14352	0.14466	0.086017	0.11711	0.13893	0.16928	0.090683	0.11626	0.14431	0.17385
2	0.10407	0.10633	0.1367	0.15228	0.096192	0.11458	0.14498	0.15368	0.073767	0.11527	0.14608	0.17028
4	0.11548	0.11911	0.14434	0.16282	0.08365	0.12998	0.15106	0.18049	0.076942	0.14464	0.15602	0.17244
8	0.1082	0.10902	0.14635	0.16223	0.08765	0.10583	0.14592	0.16174	0.083417	0.13234	0.15061	0.17877
16	0.11948	0.12203	0.14138	0.15643	0.077983	0.1368	0.14599	0.15713	0.080967	0.13485	0.16006	0.1789
32	0.13179	0.11862	0.15478	0.14824	0.10216	0.1318	0.15445	0.15331	0.095992	0.14288	0.15074	0.17896
64	0.16166	0.1173	0.13538	0.15493	0.13629	0.16532	0.15484	0.17008	0.11243	0.13432	0.15019	0.18333
K	0.35619	0.32412	0.32307	0.31548	0.040717	0.041517	0.04175	0.043125	0.075858	0.087208	0.074908	0.068933
	2	1	0.5	0.25	2	1	0.5	0.25	2	1	0.5	0.25	ITC
Cg4
MTX	1	2	3	4	5	6	7	8	9	10	11	12
0	0.075908	0.099367	0.1581	0.18394	0.073758	0.097567	0.14512	0.17899	0.083742	0.090417	0.15351	0.19617
2	0.071208	0.091925	0.14328	0.14539	0.073408	0.093867	0.14135	0.19551	0.0749	0.10882	0.15032	0.21019
4	0.053275	0.088008	0.13985	0.16939	0.080867	0.14424	0.15104	0.19995	0.089717	0.16631	0.17583	0.19705
8	0.065192	0.080575	0.14088	0.17801	0.075808	0.095892	0.15824	0.22436	0.083342	0.14304	0.17895	0.18971
16	0.0807	0.090658	0.14086	0.17296	0.079775	0.09995	0.17746	0.22998	0.068133	0.13365	0.17465	0.21404
32	0.072967	0.092183	0.14332	0.18726	0.076867	0.1188	0.1823	0.21712	0.10646	0.22237	0.19475	0.22053
64	0.091417	0.093933	0.1525	0.16989	0.083758	0.12785	0.17416	0.2091	0.10513	0.14896	0.19991	0.21054
K	0.30913	0.29048	0.29038	0.27903	0.044167	0.044575	0.044025	0.044467	0.089983	0.077317	0.078675	0.0882
	2	1	0.5	0.25	2	1	0.5	0.25	2	1	0.5	0.25	ITC
Cg5
MTX	1	2	3	4	5	6	7	8	9	10	11	12
0	0.1031	0.11834	0.18041	0.19467	0.08035	0.15899	0.14922	0.19575	0.10685	0.11519	0.14955	0.21056
2	0.092225	0.15403	0.13318	0.19251	0.10145	0.10332	0.15686	0.20247	0.10473	0.11197	0.12912	0.2037
4	0.14203	0.12445	0.19499	0.18565	0.15246	0.10243	0.1685	0.23033	0.12148	0.10564	0.14957	0.21003
8	0.086408	0.10949	0.15107	0.18353	0.10154	0.13887	0.15394	0.19482	0.099	0.14684	0.11168	0.18887
16	0.096775	0.11762	0.21676	0.19758	0.091467	0.16414	0.18373	0.19375	0.0972	0.12195	0.16183	0.20607
32	0.089425	0.11671	0.19776	0.19682	0.099675	0.13288	0.20297	0.19467	0.087867	0.12354	0.19134	0.1977
64	0.10602	0.18146	0.16895	0.17588	0.088417	0.18566	0.19466	0.21176	0.085525	0.1698	0.17312	0.19459
K	0.23152	0.21928	0.22892	0.24806	0.042117	0.04325	0.04285	0.043233	0.090817	0.091967	0.082917	0.073175
	8	4	2	1	8	4	2	1	8	4	2	1	ITC
Cg6
MTX	1	2	3	4	5	6	7	8	9	10	11	12
0	0.23126	0.1874	0.17145	0.15984	0.17326	0.17427	0.17305	0.17236	0.22519	0.18677	0.17953	0.20056
2	0.19855	0.18724	0.17239	0.15646	0.21207	0.19042	0.16686	0.17438	0.19562	0.18849	0.17761	0.20968
4	0.21407	0.19635	0.18403	0.16748	0.23612	0.15929	0.16012	0.16822	0.22677	0.18308	0.16677	0.21463
8	0.2089	0.16851	0.18806	0.18379	0.19635	0.18403	0.18681	0.17035	0.23567	0.18733	0.16667	0.19522
16	0.20908	0.18903	0.18917	0.20443	0.22395	0.18385	0.18061	0.18018	0.17948	0.19909	0.16182	0.20335
32	0.21488	0.19036	0.17669	0.15262	0.18208	0.1338	0.1904	0.17953	0.24909	0.197	0.17248	0.18432
64	0.20812	0.19847	0.18306	0.16444	0.18923	0.13288	0.13808	0.17839	0.14039	0.16356	0.13255	0.16717
K	0.31276	0.29344	0.30604	0.25642	0.041933	0.042542	0.042008	0.042475	0.097592	0.07475	0.078517	0.071842
	32	16	8	4	32	16	8	4	32	16	8	4	ITC
Sc1
CsA	1	2	3	4	5	6	7	8	9	10	11	12
0	0.14773	0.13686	0.17071	0.20343	0.12677	0.1349	0.18824	0.21231	0.12196	0.14547	0.1909	0.22213
0.5	0.17066	0.1633	0.19462	0.21818	0.15237	0.17158	0.17511	0.20928	0.13825	0.15792	0.18218	0.22367
1	0.15737	0.16574	0.20153	0.19493	0.14096	0.1624	0.20385	0.21275	0.14731	0.18644	0.2049	0.22492
2	0.15108	0.15828	0.21202	0.20008	0.14166	0.13883	0.20473	0.21257	0.13698	0.15824	0.23266	0.22165
4	0.13393	0.20198	0.23064	0.22874	0.14276	0.19116	0.23669	0.23363	0.14532	0.21175	0.24771	0.25315
8	0.16322	0.20183	0.24243	0.23572	0.14552	0.21432	0.23275	0.23482	0.17325	0.21442	0.2552	0.23494
16	0.15884	0.19782	0.21757	0.23263	0.17969	0.18136	0.20156	0.23118	0.16418	0.18811	0.21273	0.24682
K	0.25586	0.22939	0.22517	0.21636	0.042708	0.042825	0.0429	0.042933	0.11192	0.12042	0.1097	0.12575
	8	4	2	1	8	4	2	1	8	4	2	1	FLC
Sc2
CsA	1	2	3	4	5	6	7	8	9	10	11	12
0	0.084508	0.079442	0.090242	0.14149	0.0902	0.088283	0.096767	0.16461	0.0928	0.10691	0.096642	0.0566
0.5	0.075725	0.085725	0.10209	0.14762	0.071217	0.095492	0.10322	0.16666	0.0867	0.09995	0.089467	0.12297
1	0.068083	0.0659	0.10133	0.175	0.1168	0.095192	0.11809	0.2112	0.090792	0.12307	0.11131	0.17743
2	0.089792	0.077608	0.11187	0.18754	0.10743	0.10352	0.094642	0.20541	0.0971	0.10482	0.12153	0.17113
4	0.092483	0.10437	0.15323	0.22415	0.10517	0.11153	0.092483	0.21443	0.08525	0.085517	0.10863	0.22494
8	0.10799	0.1066	0.17898	0.23698	0.11507	0.10761	0.1715	0.21949	0.090392	0.10325	0.1472	0.21151
16	0.17003	0.13603	0.22172	0.206	0.14161	0.12272	0.23726	0.20583	0.14231	0.08805	0.22773	0.22688
K	0.2216	0.20067	0.22951	0.20337	0.04195	0.041067	0.041617	0.041275	0.12292	0.12972	0.12559	0.11437
	128	64	32	16	128	64	32	16	128	64	32	16	FLC
Sc3
CsA	1	2	3	4	5	6	7	8	9	10	11	12
0	0.099358	0.092558	0.15796	0.19398	0.10141	0.10834	0.13136	0.20162	0.097425	0.12818	0.14052	0.18337
0.5	0.081833	0.080092	0.13812	0.16615	0.055308	0.098067	0.10568	0.15072	0.05405	0.085425	0.12043	0.15849
1	0.097908	0.056142	0.12074	0.16132	0.066858	0.057383	0.11529	0.17382	0.078167	0.087058	0.13532	0.17587
2	0.087917	0.0726	0.11605	0.17058	0.087175	0.11158	0.094858	0.15407	0.094225	0.093975	0.094758	0.15947
4	0.0726	0.0832	0.075975	0.15804	0.082367	0.091733	0.078992	0.082742	0.078817	0.080892	0.09515	0.15693
8	0.093208	0.083167	0.075833	0.11946	0.092275	0.082433	0.10289	0.15121	0.090633	0.092333	0.097525	0.093067
16	0.11597	0.089875	0.080892	0.089725	0.11272	0.083425	0.079992	0.090033	0.13884	0.09645	0.087425	0.094475
K	0.28837	0.25644	0.24738	0.23743	0.043	0.043033	0.042583	0.043092	0.12897	0.14008	0.13228	0.12244
	64	32	16	8	64	32	16	8	64	32	16	8	FLC
Sc4
CsA	1	2	3	4	5	6	7	8	9	10	11	12
0	0.10048	0.081167	0.13173	0.21531	0.089242	0.085975	0.11906	0.21833	0.099408	0.092525	0.11595	0.2304
0.5	0.097358	0.064167	0.1011	0.19643	0.058325	0.07225	0.095783	0.1858	0.058575	0.084158	0.090158	0.23319
1	0.081958	0.072367	0.082317	0.21469	0.094233	0.051967	0.10937	0.22548	0.058783	0.064717	0.12423	0.21748
2	0.08665	0.076417	0.10049	0.18948	0.094008	0.095933	0.10532	0.19236	0.08045	0.10528	0.12453	0.20229
4	0.091142	0.0802	0.07645	0.19912	0.087017	0.084192	0.10677	0.21384	0.0859	0.10185	0.11367	0.272
8	0.09705	0.083117	0.087067	0.20782	0.103	0.0835	0.10084	0.23651	0.0864	0.10297	0.10187	0.22758
16	0.13804	0.073258	0.0735	0.14624	0.11316	0.092683	0.10262	0.19566	0.10024	0.082617	0.1065	0.17852
K	0.29552	0.26264	0.29696	0.25282	0.042183	0.042375	0.042433	0.041983	0.13364	0.15722	0.12392	0.14684
	4	2	1	0.5	4	2	1	0.5	4	2	1	0.5	FLC
Sc5
CsA	1	2	3	4	5	6	7	8	9	10	11	12
0	0.10211	0.08635	0.12627	0.20998	0.083142	0.089667	0.1251	0.19435	0.090083	0.11655	0.12965	0.20703
0.5	0.11108	0.1141	0.15321	0.18404	0.075167	0.08525	0.12449	0.18718	0.097425	0.12768	0.12281	0.20928
1	0.097258	0.09915	0.15166	0.18887	0.10795	0.06575	0.12743	0.21047	0.087608	0.1079	0.12333	0.19592
2	0.13271	0.097108	0.14305	0.19122	0.12781	0.10494	0.12011	0.18195	0.1062	0.12301	0.14203	0.20697
4	0.10967	0.094508	0.13177	0.22469	0.10309	0.11489	0.16863	0.21819	0.11477	0.13358	0.19412	0.25939
8	0.10418	0.11824	0.18459	0.21695	0.11874	0.11092	0.22142	0.22765	0.097683	0.11501	0.22614	0.21819
16	0.11683	0.12527	0.1952	0.19734	0.13045	0.099508	0.22719	0.22977	0.12492	0.090458	0.17053	0.18712
K	0.2958	0.25855	0.27694	0.235	0.0421	0.042325	0.042575	0.042583	0.14046	0.14166	0.12727	0.17518
	16	8	4	2	16	8	4	2	16	8	4	2	FLC
Sc6
CsA	1	2	3	4	5	6	7	8	9	10	11	12
0	0.11371	0.13881	0.21343	0.21142	0.10067	0.12623	0.19112	0.20854	0.12837	0.15202	0.18896	0.20301
0.5	0.095033	0.12736	0.22487	0.18752	0.066667	0.13996	0.17989	0.21208	0.068333	0.15731	0.18913	0.21119
1	0.093325	0.15587	0.20312	0.20598	0.0974	0.14239	0.18767	0.215	0.084725	0.14924	0.19919	0.21606
2	0.10551	0.14614	0.1922	0.20701	0.11289	0.13038	0.2046	0.19205	0.10352	0.14086	0.20145	0.23143
4	0.10461	0.13528	0.20336	0.21564	0.10675	0.12549	0.20089	0.19853	0.0927	0.14857	0.19531	0.21381
8	0.10927	0.13508	0.15952	0.20142	0.11799	0.13351	0.19089	0.18213	0.099108	0.12858	0.19531	0.17988
16	0.14442	0.14097	0.13106	0.1404	0.12404	0.1157	0.1235	0.1393	0.1246	0.10304	0.15205	0.15222
K	0.26916	0.2646	0.26458	0.22143	0.04195	0.041683	0.041792	0.042025	0.14469	0.15419	0.13427	0.1307
	16	8	4	2	16	8	4	2	16	8	4	2	FLC
Cg1
CsA	1	2	3	4	5	6	7	8	9	10	11	12
0	0.21195	0.22578	0.19105	0.26602	0.17048	0.21103	0.21441	0.27181	0.17961	0.18342	0.23298	0.26669
0.5	0.16882	0.19925	0.21817	0.28122	0.14475	0.18827	0.20982	0.25329	0.15561	0.17826	0.21025	0.27467
1	0.19973	0.20047	0.23773	0.2604	0.14955	0.19918	0.22207	0.24406	0.13202	0.21173	0.2039	0.24613
2	0.1866	0.16328	0.25707	0.27564	0.14818	0.16884	0.21474	0.26	0.1174	0.18802	0.2252	0.26658
4	0.168	0.17027	0.25313	0.25539	0.14264	0.16138	0.20406	0.22636	0.11157	0.1541	0.24067	0.2613
8	0.17991	0.20416	0.25653	0.26311	0.13586	0.16496	0.21962	0.22724	0.13916	0.18311	0.22679	0.29556
16	0.22423	0.22087	0.22845	0.28176	0.20284	0.22964	0.20495	0.22913	0.16013	0.18277	0.19115	0.25786
K	0.305	0.30923	0.26604	0.28476	0.044425	0.044542	0.04415	0.045825	0.12275	0.13049	0.1453	0.1294
	4	2	1	0.5	4	2	1	0.5	4	2	1	0.5	FLC
Cg2
CsA	1	2	3	4	5	6	7	8	9	10	11	12
0	0.14719	0.14183	0.22682	0.21993	0.13071	0.12148	0.20357	0.24298	0.11442	0.1246	0.2168	0.23234
0.5	0.1057	0.12752	0.21643	0.254	0.095767	0.10394	0.18784	0.19513	0.10956	0.10674	0.19412	0.24019
1	0.11206	0.13944	0.20974	0.22913	0.1035	0.11013	0.19767	0.23945	0.10691	0.12847	0.19516	0.22198
2	0.10743	0.13447	0.19687	0.24193	0.11597	0.10571	0.16091	0.21987	0.1028	0.11852	0.17258	0.23281
4	0.098417	0.15794	0.16226	0.23372	0.10225	0.15457	0.16785	0.21887	0.089467	0.11182	0.1663	0.23745
8	0.096475	0.14477	0.1766	0.24396	0.10138	0.13742	0.1529	0.24314	0.0944	0.13182	0.16918	0.26434
16	0.10737	0.13573	0.18732	0.24972	0.092833	0.15168	0.19869	0.22261	0.11304	0.1258	0.16292	0.19557
K	0.33115	0.29677	0.30034	0.30367	0.04265	0.04385	0.0435	0.043542	0.13211	0.15956	0.12461	0.1457
	8	4	2	1	8	4	2	1	8	4	2	1	FLC
Cg3
CsA	1	2	3	4	5	6	7	8	9	10	11	12
0	0.16944	0.2016	0.20697	0.26387	0.18033	0.19437	0.21087	0.25306	0.1812	0.21167	0.23963	0.30955
0.5	0.12173	0.16478	0.21383	0.24544	0.11332	0.17419	0.20399	0.23468	0.12506	0.19575	0.24002	0.29113
1	0.13475	0.13719	0.19363	0.23733	0.11679	0.14529	0.20295	0.24807	0.15372	0.17273	0.2311	0.27802
2	0.16723	0.14189	0.19421	0.23715	0.15007	0.14218	0.18506	0.23996	0.15967	0.1707	0.21794	0.28453
4	0.15718	0.13961	0.17493	0.21542	0.14057	0.13451	0.18093	0.23247	0.15199	0.16078	0.22281	0.28342
8	0.17005	0.13817	0.16592	0.21981	0.1473	0.13935	0.17272	0.24331	0.14202	0.15327	0.22033	0.29109
16	0.20532	0.15763	0.15823	0.24056	0.14956	0.15251	0.18658	0.25439	0.16291	0.17038	0.24233	0.28184
K	0.30596	0.28944	0.27878	0.26969	0.04595	0.045758	0.046117	0.046217	0.14633	0.17226	0.16633	0.15289
	16	8	4	2	16	8	4	2	16	8	4	2	FLC
Cg4
CsA	1	2	3	4	5	6	7	8	9	10	11	12
0	0.19175	0.18583	0.22345	0.2515	0.18537	0.20442	0.24923	0.26641	0.18327	0.22623	0.25698	0.2865
0.5	0.15863	0.17589	0.23292	0.22771	0.12862	0.17002	0.21203	0.24256	0.1419	0.19328	0.22868	0.26892
1	0.15954	0.17141	0.22399	0.2437	0.13959	0.1771	0.22675	0.26136	0.13607	0.18889	0.25336	0.27977
2	0.16197	0.14742	0.20768	0.23166	0.13248	0.15189	0.20453	0.23158	0.13172	0.17068	0.25318	0.27035
4	0.19077	0.14572	0.19027	0.23251	0.1193	0.14489	0.19321	0.22881	0.13472	0.15536	0.2329	0.25984
8	0.16558	0.12994	0.16664	0.20568	0.16819	0.13574	0.19693	0.26256	0.16057	0.15097	0.20636	0.25135
16	0.18135	0.11872	0.13587	0.18703	0.16051	0.15062	0.16547	0.21053	0.14033	0.16217	0.24141	0.24856
K	0.32052	0.25431	0.28378	0.27652	0.042275	0.04325	0.042583	0.042825	0.12772	0.17285	0.12091	0.10426
	4	2	1	0.5	4	2	1	0.5	4	2	1	0.5	FLC
Cg5
CsA	1	2	3	4	5	6	7	8	9	10	11	12
0	0.12	0.18584	0.282	0.27077	0.096233	0.18946	0.28311	0.25896	0.12698	0.19112	0.23044	0.29837
0.5	0.091542	0.13005	0.23523	0.2042	0.097608	0.13038	0.21255	0.2202	0.11856	0.13735	0.16747	0.24272
1	0.092358	0.14041	0.18787	0.22808	0.097508	0.14465	0.20536	0.23118	0.10733	0.15796	0.21467	0.23683
2	0.097933	0.11628	0.18606	0.22402	0.098	0.12543	0.19432	0.23268	0.11091	0.14409	0.21296	0.27437
4	0.10868	0.11513	0.17642	0.21607	0.084725	0.11982	0.183	0.23372	0.11045	0.14409	0.20936	0.27606
8	0.10956	0.11114	0.16837	0.20657	0.1094	0.12856	0.19061	0.25544	0.11888	0.14348	0.22988	0.29597
16	0.14557	0.13498	0.15635	0.20893	0.14953	0.13969	0.18678	0.22795	0.15093	0.13714	0.20758	0.2637
K	0.29738	0.29941	0.28784	0.3171	0.045325	0.045958	0.046058	0.046367	0.13198	0.14957	0.15109	0.17809
	128	64	32	16	128	64	32	16	128	64	32	16	FLC
Cg6
CsA	1	2	3	4	5	6	7	8	9	10	11	12
0	0.093192	0.1089	0.19695	0.2267	0.10617	0.12078	0.20724	0.24211	0.11703	0.12548	0.18563	0.28076
0.5	0.087325	0.12419	0.20302	0.21003	0.083442	0.11086	0.21068	0.20818	0.099758	0.12649	0.19729	0.25222
1	0.093067	0.12909	0.20083	0.23356	0.10016	0.11419	0.21053	0.25028	0.10281	0.12787	0.2011	0.25152
2	0.10362	0.091517	0.18221	0.22565	0.099983	0.10139	0.1924	0.23784	0.089792	0.1222	0.22707	0.28407
4	0.10182	0.10203	0.16976	0.22707	0.083517	0.10217	0.16902	0.27076	0.0891	0.10606	0.19945	0.28209
8	0.10667	0.094033	0.12832	0.23943	0.099025	0.092317	0.13062	0.24397	0.093642	0.1014	0.14701	0.27918
16	0.1459	0.10168	0.089925	0.22257	0.12072	0.11805	0.13588	0.19802	0.12955	0.1021	0.14397	0.27794
K	0.30428	0.30823	0.33333	0.27882	0.042083	0.042883	0.043092	0.043558	0.12793	0.16452	0.13143	0.15121
	256	128	64	32	256	128	64	32	256	128	64	32	FLC
Cg3
CsA	1	2	3	4	5	6	7	8	9	10	11	12
0	0.17093	0.17009	0.17962	0.19655	0.11172	0.40529	0.19469	0.21955	0.10355	0.1737	0.18881	0.21088
0.5	0.1146	0.11681	0.089425	0.13438	0.087617	0.11121	0.091992	0.15506	0.10055	0.12234	0.097483	0.14894
1	0.11098	0.0993	0.10388	0.093983	0.10765	0.10302	0.10839	0.10604	0.095042	0.10662	0.10384	0.095283
2	0.11193	0.0956	0.10098	0.095058	0.098833	0.094233	0.10214	0.10485	0.087742	0.086825	0.11047	0.10258
4	0.0957	0.11243	0.09075	0.11092	0.11413	0.086867	0.095417	0.13914	0.096558	0.10291	0.12175	0.12625
8	0.10902	0.11632	0.09745	0.11423	0.09895	0.10014	0.11877	0.13324	0.091692	0.12574	0.12949	0.12199
16	0.1287	0.12379	0.14721	0.12777	0.13251	0.1375	0.12514	0.15668	0.1138	0.079858	0.096533	0.16149
K	0.3351	0.26885	0.26412	0.27433	0.043308	0.043417	0.043908	0.043483	0.11226	0.10182	0.10188	0.11885
	2	1	0.5	0.25	2	1	0.5	0.25	2	1	0.5	0.25	ITC
Sc1
CsA	1	2	3	4	5	6	7	8	9	10	11	12
0	0.072425	0.072475	0.093625	0.25012	0.066825	0.06985	0.0952	0.25785	0.0663	0.06845	0.089275	0.2243
0.125	0.09515	0.08185	0.0879	0.21845	0.087025	0.067	0.07955	0.1687	0.09485	0.079775	0.0818	0.19817
0.25	0.10053	0.075375	0.07885	0.16505	0.093025	0.07205	0.093525	0.27213	0.079425	0.14483	0.0716	0.12753
0.5	0.09065	0.0736	0.096	0.10098	0.081475	0.072975	0.16105	0.12848	0.064225	0.14265	0.0651	0.093575
1	0.10775	0.0793	0.07675	0.083925	0.087475	0.07245	0.13713	0.080025	0.084575	0.10662	0.0824	0.08355
2	0.0664	0.053125	0.075325	0.1009	0.059275	0.059575	0.099525	0.11465	0.06105	0.059825	0.09025	0.1171
4	0.050475	0.04465	0.043	0.04375	0.047075	0.0435	0.044075	0.0446	0.0471	0.045275	0.04565	0.04475
K	0.2129	0.15487	0.21575	0.18842	0.0438	0.043025	0.04415	0.043025	0.038775	0.0429	0.038025	0.03995
	4	2	1	0.5	4	2	1	0.5	4	2	1	0.5	ITC
Sc2
CsA	1	2	3	4	5	6	7	8	9	10	11	12
0	0.08375	0.13487	0.12825	0.15957	0.08885	0.13945	0.1532	0.13328	0.1042	0.21033	0.15535	0.17167
0.125	0.10158	0.12318	0.14658	0.143	0.0821	0.13297	0.13573	0.13225	0.076425	0.13685	0.1146	0.13725
0.25	0.09365	0.10932	0.15955	0.14353	0.0821	0.11628	0.14578	0.1432	0.08075	0.12555	0.15018	0.15065
0.5	0.070875	0.0621	0.12255	0.12107	0.06565	0.072175	0.11015	0.13352	0.0703	0.0716	0.10217	0.096075
1	0.0627	0.058125	0.06835	0.12193	0.05685	0.064225	0.0853	0.1211	0.0595	0.071025	0.093075	0.10927
2	0.0684	0.05035	0.0519	0.07475	0.065125	0.057625	0.078325	0.095575	0.061725	0.06475	0.07985	0.06535
4	0.064825	0.049925	0.05475	0.056075	0.054525	0.053825	0.051675	0.056825	0.053825	0.04795	0.0504	0.05845
K	0.19835	0.17805	0.14787	0.20382	0.043875	0.04425	0.045375	0.044525	0.0389	0.040275	0.038725	0.038675
	4	2	1	0.5	4	2	1	0.5	4	2	1	0.5	ITC
Sc4
CsA	1	2	3	4	5	6	7	8	9	10	11	12
0	0.041175	0.04095	0.0829	0.1494	0.039425	0.039175	0.0862	0.14902	0.03865	0.04415	0.095875	0.1458
0.125	0.0385	0.037625	0.042025	0.12045	0.037175	0.03795	0.0522	0.13515	0.035725	0.037075	0.053925	0.085025
0.25	0.036375	0.03605	0.04865	0.0764	0.036775	0.0361	0.04225	0.10555	0.036175	0.0362	0.041875	0.069975
0.5	0.037375	0.0354	0.03615	0.04435	0.0387	0.0361	0.03665	0.05015	0.036775	0.03865	0.036025	0.07165
1	0.0367	0.03775	0.0366	0.036075	0.038725	0.0368	0.0359	0.03575	0.038225	0.035075	0.03625	0.036375
2	0.03935	0.035625	0.0349	0.035725	0.03795	0.035575	0.035725	0.035075	0.03845	0.0352	0.03565	0.03685
4	0.042375	0.03535	0.035625	0.036025	0.041325	0.0357	0.036525	0.03925	0.042375	0.0382	0.03955	0.0383
K	0.1612	0.14627	0.13877	0.1649	0.041325	0.04145	0.0412	0.041275	0.038275	0.040925	0.037575	0.038775
	2	1	0.5	0.25	2	1	0.5	0.25	2	1	0.5	0.25	ITC
Sc5
CsA	1	2	3	4	5	6	7	8	9	10	11	12
0	0.05215	0.060725	0.12715	0.16775	0.048775	0.05225	0.1212	0.154	0.050025	0.057875	0.118	0.12732
0.125	0.049225	0.04675	0.082725	0.15462	0.04805	0.045975	0.07105	0.14402	0.043475	0.04695	0.077125	0.14035
0.25	0.049175	0.04365	0.080225	0.16415	0.04635	0.045025	0.0681	0.16125	0.0458	0.048075	0.067775	0.15095
0.5	0.048975	0.044325	0.0567	0.1549	0.048325	0.0461	0.068575	0.14213	0.04855	0.046275	0.063125	0.15613
1	0.049975	0.0436	0.045625	0.071225	0.0469	0.04635	0.04745	0.08645	0.0481	0.045525	0.046375	0.0812
2	0.049925	0.04165	0.041375	0.04445	0.0459	0.043375	0.042375	0.0458	0.046175	0.042375	0.042725	0.038975
4	0.0478	0.040425	0.03825	0.04195	0.046625	0.04205	0.04065	0.040425	0.04445	0.040675	0.042675	0.042025
K	0.15747	0.1602	0.17295	0.16277	0.042325	0.042175	0.04165	0.04165	0.037925	0.039325	0.03805	0.038175
	4	2	1	0.5	4	2	1	0.5	4	2	1	0.5	ITC
Cg1
CsA	1	2	3	4	5	6	7	8	9	10	11	12
0	0.13403	0.17417	0.1804	0.1856	0.0961	0.1152	0.12575	0.18765	0.1057	0.13692	0.16	0.166
0.125	0.064325	0.10825	0.12685	0.1266	0.04795	0.0951	0.11888	0.129	0.048425	0.1194	0.10972	0.14533
0.25	0.04775	0.0776	0.095725	0.12525	0.04295	0.1039	0.12057	0.12898	0.04365	0.10827	0.10633	0.13453
0.5	0.035525	0.061	0.11093	0.11792	0.04435	0.06915	0.1142	0.11655	0.046525	0.08645	0.096925	0.12558
1	0.03835	0.054525	0.09365	0.10168	0.03985	0.05585	0.092025	0.10907	0.0416	0.07745	0.0924	0.11987
2	0.0358	0.0497	0.1246	0.10542	0.0354	0.072875	0.12712	0.10698	0.040325	0.05165	0.12973	0.10265
4	0.03725	0.0375	0.057425	0.12073	0.038	0.040025	0.058075	0.13383	0.037425	0.0469	0.064975	0.11735
K	0.21898	0.2306	0.17772	0.21055	0.0399	0.041075	0.04025	0.041375	0.03775	0.03495	0.038575	0.036775
	1	0.5	0.25	0.125	1	0.5	0.25	0.125	1	0.5	0.25	0.125	ITC
Cg2
CsA	1	2	3	4	5	6	7	8	9	10	11	12
0	0.05765	0.09935	0.1603	0.20885	0.0589	0.11155	0.16605	0.17988	0.0591	0.11425	0.1538	0.17875
0.125	0.0457	0.081575	0.13927	0.16945	0.042975	0.09535	0.12665	0.1554	0.043325	0.076075	0.12997	0.16723
0.25	0.041075	0.0657	0.10908	0.13785	0.0386	0.055275	0.097875	0.12992	0.039875	0.0621	0.09455	0.15988
0.5	0.04065	0.046475	0.063125	0.10128	0.038425	0.0441	0.06485	0.10415	0.04085	0.04385	0.0712	0.12
1	0.040225	0.03865	0.040975	0.048675	0.038525	0.0389	0.041875	0.049	0.039075	0.039575	0.0397	0.047875
2	0.03985	0.038175	0.038675	0.040275	0.038525	0.03965	0.03965	0.04035	0.03865	0.038575	0.04805	0.051525
4	0.043075	0.041725	0.039075	0.0411	0.039325	0.041225	0.041725	0.049125	0.04305	0.038425	0.0438	0.04125
K	0.2341	0.1962	0.2001	0.1953	0.04455	0.045125	0.0439	0.043875	0.039725	0.04045	0.039125	0.03895
	1	0.5	0.25	0.125	1	0.5	0.25	0.125	1	0.5	0.25	0.125	ITC
Cg4
CsA	1	2	3	4	5	6	7	8	9	10	11	12
0	0.1109	0.12778	0.13368	0.16598	0.10198	0.12677	0.11745	0.16243	0.095525	0.14317	0.1486	0.16377
0.125	0.057675	0.0791	0.1098	0.1521	0.050375	0.066525	0.10107	0.13895	0.047675	0.064175	0.097525	0.13867
0.25	0.054825	0.05365	0.09285	0.12697	0.05385	0.054925	0.091025	0.11703	0.052125	0.054225	0.0862	0.14875
0.5	0.05935	0.050025	0.060125	0.090325	0.048175	0.0544	0.058725	0.0936	0.053275	0.053575	0.06005	0.12195
1	0.0555	0.04585	0.054525	0.066925	0.05655	0.045625	0.064875	0.077875	0.051	0.048125	0.0581	0.074725
2	0.0549	0.0419	0.0599	0.1108	0.047825	0.049375	0.082025	0.099075	0.05375	0.05695	0.085575	0.10913
4	0.0485	0.04455	0.05295	0.10652	0.045225	0.0453	0.063025	0.097175	0.04835	0.04645	0.0527	0.10993
K	0.24815	0.22772	0.22023	0.24202	0.040975	0.0425	0.04135	0.042375	0.036925	0.03905	0.036825	0.037
	2	1	0.5	0.25	2	1	0.5	0.25	2	1	0.5	0.25	ITC
Cg5
CsA	1	2	3	4	5	6	7	8	9	10	11	12
0	0.1837	0.1682	0.20165	0.23528	0.1102	0.15638	0.2038	0.22475	0.13475	0.1702	0.1925	0.23005
0.125	0.17253	0.09315	0.17775	0.19338	0.11938	0.14667	0.1444	0.18667	0.11715	0.14353	0.1288	0.2208
0.25	0.15233	0.07965	0.1107	0.188	0.1092	0.097925	0.11555	0.12685	0.10047	0.11562	0.1342	0.20345
0.5	0.11398	0.0748	0.07235	0.12342	0.073225	0.071225	0.07465	0.1597	0.097475	0.098125	0.079825	0.17912
1	0.091225	0.0593	0.069575	0.080225	0.076825	0.0704	0.079525	0.0732	0.0955	0.0852	0.076525	0.11583
2	0.089725	0.06245	0.067175	0.0656	0.0751	0.076725	0.0822	0.0803	0.08135	0.084125	0.088375	0.10245
4	0.076375	0.0865	0.07665	0.073475	0.072725	0.0941	0.10262	0.081375	0.07545	0.08075	0.091625	0.08985
K	0.2384	0.2072	0.20787	0.2052	0.039875	0.03985	0.039775	0.04015	0.0354	0.0363	0.035	0.035075
	8	4	2	1	8	4	2	1	8	4	2	1	ITC
Cg6
CsA	1	2	3	4	5	6	7	8	9	10	11	12
0	0.2871	0.2725	0.24473	0.25848	0.26135	0.24953	0.254	0.25627	0.2623	0.26178	0.25215	0.23327
0.125	0.28328	0.23822	0.24285	0.24608	0.21325	0.24493	0.16103	0.23022	0.23023	0.23855	0.23377	0.25255
0.25	0.24453	0.22993	0.23222	0.23425	0.19235	0.23642	0.2344	0.2245	0.18975	0.19427	0.22428	0.22565
0.5	0.24385	0.20882	0.23043	0.2251	0.16538	0.19025	0.21538	0.17745	0.19612	0.18223	0.15702	0.17063
1	0.2116	0.15555	0.18643	0.18962	0.1525	0.14773	0.1227	0.12257	0.16112	0.14832	0.13837	0.12798
2	0.16855	0.13955	0.14198	0.12567	0.1241	0.1194	0.11238	0.1145	0.14427	0.12188	0.11483	0.1144
4	0.13522	0.090375	0.0784	0.084275	0.10765	0.088575	0.074375	0.07075	0.11972	0.092725	0.093225	0.0751
K	0.2384	0.25153	0.24262	0.23545	0.0433	0.045075	0.04435	0.0451	0.04185	0.039625	0.0385	0.04145
	32	16	8	4	32	16	8	4	32	16	8	4	ITC
Sc1
CsA	1	2	3	4	5	6	7	8	9	10	11	12
0	0.042775	0.0916	0.12985	0.1082	0.0405	0.0865	0.12833	0.12238	0.04105	0.10892	0.11355	0.1211
0.125	0.04165	0.04965	0.12515	0.11998	0.03745	0.046125	0.12805	0.10243	0.0384	0.0412	0.1301	0.1086
0.25	0.038775	0.04075	0.15687	0.1258	0.03665	0.03935	0.14325	0.092725	0.03695	0.03805	0.10712	0.14465
0.5	0.037775	0.037025	0.040525	0.1224	0.037675	0.036475	0.039225	0.13285	0.03715	0.036975	0.03675	0.11555
1	0.03725	0.0383	0.0358	0.037975	0.0382	0.037	0.036875	0.0356	0.03695	0.037375	0.0369	0.03575
2	0.0366	0.0363	0.0367	0.0354	0.038325	0.0358	0.036575	0.035525	0.03725	0.038175	0.04045	0.0369
4	0.04165	0.03655	0.031525	0.033	0.036725	0.03695	0.03575	0.03595	0.036625	0.036275	0.0369	0.0362
K	0.1805	0.1529	0.1754	0.17867	0.042375	0.042925	0.04175	0.043475	0.036875	0.038725	0.0363	0.0386
	0.5	0.25	0.125	0.0625	0.5	0.25	0.125	0.0625	0.5	0.25	0.125	0.0625	AMB
Sc2
CsA	1	2	3	4	5	6	7	8	9	10	11	12
0	0.11252	0.12728	0.1441	0.15665	0.13225	0.14703	0.12755	0.14238	0.12562	0.1152	0.12703	0.14097
0.125	0.10658	0.11807	0.14565	0.1584	0.10245	0.1162	0.12753	0.13322	0.08885	0.13373	0.12708	0.11867
0.25	0.05725	0.11395	0.1356	0.1422	0.036575	0.11232	0.1366	0.12853	0.036875	0.1037	0.12362	0.14645
0.5	0.035075	0.12295	0.1212	0.13267	0.035775	0.10692	0.1297	0.1512	0.036125	0.10775	0.1266	0.1192
1	0.0349	0.035175	0.10145	0.1373	0.036425	0.037125	0.12053	0.1427	0.035875	0.035825	0.098475	0.13105
2	0.035125	0.03595	0.091125	0.19617	0.036075	0.035425	0.11677	0.18117	0.036475	0.035425	0.15715	0.16657
4	0.035075	0.0344	0.12403	0.1262	0.02915	0.0362	0.15457	0.15567	0.0353	0.03555	0.15165	0.14247
K	0.20593	0.16962	0.16033	0.2306	0.041525	0.041425	0.04125	0.041275	0.03625	0.029975	0.036475	0.03535
	0.25	0.125	0.0625	0.03125	0.25	0.125	0.0625	0.03125	0.25	0.125	0.0625	0.03125	AMB
Sc3
CsA	1	2	3	4	5	6	7	8	9	10	11	12
0	0.14777	0.11575	0.1314	0.14357	0.09905	0.13215	0.14855	0.132	0.10252	0.13565	0.12475	0.12387
0.125	0.0796	0.10678	0.10142	0.10715	0.0458	0.10625	0.11138	0.11523	0.039125	0.11007	0.113	0.10908
0.25	0.038025	0.10865	0.135	0.1133	0.03635	0.13583	0.13063	0.14232	0.034925	0.11543	0.12075	0.11415
0.5	0.03645	0.11048	0.11293	0.11675	0.03605	0.09975	0.11415	0.12032	0.0357	0.109	0.11593	0.11455
1	0.035325	0.0368	0.036075	0.05065	0.0376	0.035675	0.0357	0.079025	0.035425	0.036675	0.035225	0.076675
2	0.0332	0.035475	0.036	0.04805	0.0368	0.0359	0.0352	0.037125	0.035475	0.030325	0.03165	0.037
4	0.03615	0.035625	0.03545	0.06895	0.03665	0.035425	0.036525	0.0368	0.036175	0.028925	0.02875	0.037325
K	0.14392	0.12277	0.13442	0.13385	0.0415	0.04105	0.041925	0.042175	0.0406	0.03615	0.03575	0.03575
	0.125	0.0625	0.03125	0.015625	0.125	0.0625	0.03125	0.015625	0.125	0.0625	0.03125	0.015625	AMB
Sc5
CsA	1	2	3	4	5	6	7	8	9	10	11	12
0	0.12382	0.13715	0.1501	0.14988	0.11505	0.14042	0.15187	0.13465	0.11615	0.12897	0.1372	0.15282
0.125	0.11695	0.10635	0.1371	0.1206	0.07225	0.11775	0.1296	0.1286	0.078075	0.1072	0.1085	0.1403
0.25	0.0384	0.10012	0.11123	0.10382	0.036175	0.11245	0.12182	0.12645	0.0354	0.10535	0.11873	0.124
0.5	0.0363	0.12327	0.12497	0.1305	0.03525	0.11225	0.12645	0.13747	0.034625	0.11705	0.1239	0.13933
1	0.0345	0.035925	0.039125	0.11507	0.0348	0.03455	0.041775	0.11617	0.035675	0.035525	0.03835	0.11163
2	0.0366	0.034125	0.0357	0.1108	0.034725	0.034825	0.0373	0.11805	0.03495	0.034775	0.039775	0.11845
4	0.0365	0.03465	0.03685	0.1227	0.03505	0.03445	0.041	0.12705	0.034375	0.035675	0.04375	0.12083
K	0.19078	0.16393	0.15263	0.17472	0.040325	0.04105	0.0407	0.0404	0.034175	0.035225	0.034125	0.0354
	0.125	0.0625	0.03125	0.015625	0.125	0.0625	0.03125	0.015625	0.125	0.0625	0.03125	0.015625	AMB
Sc6
CsA	1	2	3	4	5	6	7	8	9	10	11	12
0	0.1617	0.14063	0.19385	0.1569	0.11685	0.1363	0.1266	0.1228	0.1128	0.12815	0.13355	0.1281
0.125	0.11528	0.1453	0.1231	0.11633	0.1055	0.11927	0.1082	0.13775	0.1099	0.11425	0.11885	0.13508
0.25	0.093525	0.12855	0.11987	0.11423	0.0811	0.12122	0.11315	0.13772	0.088225	0.1417	0.128	0.12933
0.5	0.037775	0.13105	0.1305	0.1311	0.037325	0.11488	0.13025	0.13242	0.036875	0.1186	0.1302	0.13127
1	0.03675	0.03715	0.0923	0.1132	0.036675	0.037325	0.099075	0.11373	0.0361	0.035725	0.0987	0.11102
2	0.037	0.038375	0.11155	0.11578	0.0364	0.037975	0.10455	0.11765	0.03665	0.037925	0.1115	0.11985
4	0.0373	0.04135	0.093075	0.1058	0.03665	0.045925	0.0963	0.10605	0.036925	0.041775	0.09815	0.10527
K	0.16017	0.12923	0.13662	0.13862	0.041725	0.041975	0.0393	0.041675	0.0364	0.037125	0.0397	0.038
	0.0625	0.03125	0.015625	0.0078125	0.0625	0.03125	0.015625	0.0078125	0.0625	0.03125	0.015625	0.0078125	AMB
Cg1
CsA	1	2	3	4	5	6	7	8	9	10	11	12
0	0.12395	0.15547	0.16138	0.17728	0.10622	0.164	0.15685	0.19015	0.10812	0.15965	0.20117	0.19168
0.125	0.084725	0.13532	0.13858	0.15418	0.0966	0.14417	0.1802	0.17845	0.060625	0.13315	0.16117	0.18042
0.25	0.055225	0.13713	0.13375	0.1749	0.040675	0.15812	0.17505	0.16012	0.043575	0.1482	0.17417	0.19677
0.5	0.037825	0.1107	0.14265	0.14492	0.035625	0.11933	0.14855	0.18213	0.036675	0.12108	0.1578	0.16117
1	0.037175	0.035375	0.086825	0.13255	0.035425	0.035525	0.0977	0.13513	0.036925	0.035575	0.09175	0.14465
2	0.038475	0.037825	0.098375	0.13475	0.035275	0.037175	0.09545	0.16135	0.037	0.0324	0.1135	0.1761
4	0.036025	0.03605	0.11475	0.1655	0.036	0.032175	0.13275	0.14992	0.03185	0.03105	0.1257	0.1484
K	0.24973	0.2399	0.2265	0.2212	0.04135	0.042125	0.041	0.04345	0.037725	0.035575	0.03555	0.037
	0.25	0.125	0.0625	0.03125	0.25	0.125	0.0625	0.03125	0.25	0.125	0.0625	0.03125	AMB
Cg2
CsA	1	2	3	4	5	6	7	8	9	10	11	12
0	0.042125	0.099625	0.12837	0.12665	0.0464	0.11957	0.14617	0.14972	0.04075	0.1165	0.13165	0.16007
0.125	0.03915	0.07905	0.09075	0.12685	0.0356	0.097425	0.11667	0.1225	0.0354	0.10142	0.096025	0.12228
0.25	0.03445	0.090675	0.13702	0.1203	0.035575	0.10115	0.13018	0.13302	0.036825	0.11318	0.12253	0.14132
0.5	0.035125	0.03465	0.11627	0.15112	0.033675	0.0351	0.11915	0.12567	0.034475	0.0345	0.11335	0.14695
1	0.032975	0.03495	0.03415	0.13932	0.034775	0.033775	0.035825	0.12747	0.033775	0.033925	0.0335	0.0348
2	0.035475	0.03525	0.032875	0.03645	0.03455	0.0339	0.03335	0.034625	0.033525	0.0333	0.035125	0.073
4	0.0349	0.0331	0.0346	0.15063	0.03515	0.03445	0.03485	0.14672	0.035025	0.033925	0.033325	0.14783
K	0.24655	0.21227	0.23043	0.22168	0.040375	0.038825	0.040925	0.0408	0.036575	0.0341	0.035125	0.037475
	0.5	0.25	0.125	0.0625	0.5	0.25	0.125	0.0625	0.5	0.25	0.125	0.0625	AMB
Cg3
CsA	1	2	3	4	5	6	7	8	9	10	11	12
0	0.15025	0.17785	0.16707	0.18248	0.1111	0.17585	0.18542	0.17563	0.102	0.16447	0.17805	0.19485
0.125	0.1212	0.12795	0.12788	0.14015	0.10197	0.11928	0.13418	0.145	0.073625	0.133	0.10438	0.1905
0.25	0.044425	0.11363	0.12835	0.1508	0.044625	0.14885	0.14697	0.14325	0.042675	0.10942	0.12255	0.20698
0.5	0.036225	0.10442	0.14835	0.15145	0.036	0.11348	0.12138	0.12978	0.03625	0.10447	0.095475	0.18892
1	0.03575	0.034425	0.1001	0.1366	0.0369	0.0349	0.0971	0.13725	0.03535	0.034775	0.085025	0.17468
2	0.036375	0.03505	0.11523	0.1586	0.035175	0.035575	0.1081	0.18473	0.035525	0.035325	0.10845	0.20288
4	0.036675	0.0427	0.12683	0.169	0.0359	0.060275	0.15625	0.17398	0.0378	0.044175	0.1183	0.18358
K	0.2367	0.2067	0.2227	0.24532	0.04205	0.040725	0.041125	0.0429	0.04023	0.035925	0.036425	0.035775
	0.125	0.0625	0.03125	0.015625	0.125	0.0625	0.03125	0.015625	0.125	0.0625	0.03125	0.015625	AMB
Cg4
CsA	1	2	3	4	5	6	7	8	9	10	11	12
0	0.039375	0.10185	0.12655	0.15188	0.037275	0.12173	0.14322	0.13932	0.04415	0.13295	0.13563	0.15955
0.125	0.036575	0.0901	0.1086	0.10838	0.035075	0.0815	0.1094	0.1126	0.03555	0.0807	0.0899	0.15095
0.25	0.03565	0.073875	0.11488	0.126	0.034975	0.070075	0.12315	0.13095	0.033025	0.071325	0.0968	0.1442
0.5	0.0357	0.06715	0.1013	0.14063	0.034975	0.03515	0.08375	0.1117	0.033575	0.03645	0.082375	0.13358
1	0.033825	0.033875	0.0328	0.03365	0.034025	0.033725	0.033175	0.068475	0.033375	0.033725	0.0347	0.10158
2	0.03335	0.0327	0.032175	0.036275	0.034025	0.0341	0.033875	0.095825	0.03375	0.034475	0.0343	0.10855
4	0.0338	0.03355	0.03205	0.12933	0.035175	0.036275	0.0348	0.12465	0.0348	0.034875	0.03415	0.12578
K	0.28278	0.2358	0.24077	0.2363	0.039575	0.041025	0.0411	0.0431	0.03575	0.035025	0.035025	0.0343
	0.5	0.25	0.125	0.0625	0.5	0.25	0.125	0.0625	0.5	0.25	0.125	0.0625	AMB
Cg5
CsA	1	2	3	4	5	6	7	8	9	10	11	12
0	0.064125	0.13525	0.12578	0.15128	0.05845	0.1212	0.16307	0.16685	0.055925	0.14463	0.15047	0.1765
0.125	0.0468	0.10352	0.116	0.13258	0.0399	0.10613	0.1229	0.1361	0.03965	0.097575	0.11983	0.16817
0.25	0.040625	0.099725	0.12288	0.129	0.039125	0.11452	0.1154	0.12785	0.0387	0.10148	0.11745	0.15585
0.5	0.0378	0.081375	0.12022	0.1296	0.03845	0.075225	0.1174	0.13595	0.03865	0.069925	0.11618	0.16162
1	0.033275	0.03435	0.038225	0.10428	0.0377	0.038475	0.039125	0.10375	0.038825	0.03715	0.0382	0.1211
2	0.039325	0.038125	0.03775	0.12065	0.037275	0.038875	0.03935	0.11192	0.03885	0.039575	0.037975	0.12472
4	0.03795	0.037225	0.03985	0.12915	0.038575	0.03855	0.038475	0.13762	0.04015	0.0386	0.037875	0.13797
K	0.23638	0.20612	0.21223	0.242	0.0439	0.043275	0.04315	0.04435	0.0388	0.038725	0.037075	0.03835
	0.5	0.25	0.125	0.0625	0.5	0.25	0.125	0.0625	0.5	0.25	0.125	0.0625	AMB
Cg6
CsA	1	2	3	4	5	6	7	8	9	10	11	12
0	0.14908	0.19395	0.23198	0.25523	0.13098	0.20125	0.21373	0.22798	0.1029	0.17605	0.23845	0.2647
0.125	0.13035	0.16187	0.17397	0.20035	0.096375	0.15147	0.14407	0.16205	0.076775	0.11527	0.1522	0.23478
0.25	0.08475	0.14487	0.18275	0.2066	0.10413	0.1381	0.16848	0.1799	0.0598	0.12953	0.13345	0.23705
0.5	0.038625	0.14577	0.18272	0.2131	0.0379	0.13125	0.17885	0.18197	0.037625	0.116	0.16657	0.21907
1	0.03715	0.042275	0.11815	0.20215	0.0377	0.048925	0.1197	0.18033	0.038525	0.04385	0.098	0.20235
2	0.037325	0.05005	0.12805	0.19617	0.036575	0.0609	0.13412	0.19502	0.0365	0.0984	0.13725	0.21197
4	0.0376	0.12393	0.1439	0.20215	0.03605	0.12933	0.14222	0.20832	0.039075	0.1257	0.15208	0.1983
K	0.2648	0.26847	0.25333	0.27808	0.043225	0.04305	0.0447	0.0426	0.037275	0.038475	0.037	0.0381
	0.125	0.0625	0.03125	0.015625	0.125	0.0625	0.03125	0.015625	0.125	0.0625	0.03125	0.015625	AMB
Cg1
Fk506	1	2	3	4	5	6	7	8	9	10	11	12
0	0.17302	0.18573	0.21185	0.28572	0.15567	0.1775	0.21977	0.26955	0.15878	0.183045	0.2078	0.2223
0.25	0.15923	0.1506	0.20507	0.2254	0.14865	0.1604	0.21182	0.23643	0.13997	0.1622	0.20847	0.23772
0.5	0.1472	0.1701	0.1851	0.19595	0.12915	0.15677	0.19265	0.2295	0.12945	0.1676	0.19232	0.20302
1	0.13755	0.1449	0.16635	0.2054	0.156175	0.12808	0.1639	0.18968	0.12552	0.16017	0.18242	0.22092
2	0.13127	0.13723	0.18165	0.19305	0.1293	0.14527	0.1782	0.2122	0.11115	0.15863	0.17722	0.20963
4	0.13017	0.14162	0.15635	0.1617	0.1486	0.1421	0.1538	0.20098	0.114	0.15935	0.17795	0.23577
8	0.13082	0.14105	0.1685	0.15507	0.11495	0.1463	0.1668	0.17455	0.11973	0.15765	0.16553	0.17885
K	0.2831	0.2227	0.28238	0.23215	0.041925	0.042275	0.0419	0.0418	0.036	0.04975	0.04985	0.0465
	8	4	2	1	8	4	2	1	8	4	2	1	FLC
Cg2
Fk506	1	2	3	4	5	6	7	8	9	10	11	12
0	0.07245	0.10452	0.1814	0.18078	0.05685	0.08825	0.21525	0.1968	0.053225	0.11612	0.1811	0.23567
0.25	0.0607	0.058525	0.18497	0.18	0.04935	0.06765	0.19958	0.19557	0.050425	0.07055	0.18438	0.21828
0.5	0.0624	0.0645	0.17758	0.17515	0.041675	0.070375	0.15108	0.18862	0.0513	0.12252	0.18962	0.20017
1	0.06015	0.0556	0.15795	0.17865	0.037275	0.068525	0.17582	0.17542	0.043425	0.075825	0.17725	0.19925
2	0.0426	0.0583	0.16458	0.18382	0.05985	0.0817	0.14432	0.15227	0.03965	0.0518	0.16318	0.19013
4	0.046975	0.0636	0.16898	0.21077	0.037475	0.06995	0.15668	0.17835	0.0445	0.057975	0.172	0.20768
8	0.0359	0.0615	0.18925	0.17902	0.037025	0.051375	0.24535	0.23583	0.0373	0.058725	0.17007	0.19732
K	0.25215	0.24497	0.24345	0.23673	0.04125	0.04085	0.0431	0.0409	0.0368	0.03785	0.035225	0.0355
	8	4	2	1	8	4	2	1	8	4	2	1	FLC
Cg3
Fk506	1	2	3	4	5	6	7	8	9	10	11	12
0	0.11245	0.15653	0.16555	0.2137	0.1088	0.14713	0.1879	0.2161	0.12618	0.15503	0.1671	0.2043
0.25	0.10108	0.13958	0.16608	0.18562	0.0841	0.13335	0.16533	0.20368	0.09855	0.13893	0.1835	0.20482
0.5	0.0789	0.1278	0.16692	0.18618	0.07285	0.12545	0.18608	0.2002	0.0925	0.13463	0.18387	0.19905
1	0.08	0.13193	0.16805	0.18647	0.067375	0.13078	0.17702	0.19965	0.077625	0.13252	0.17778	0.18638
2	0.0728	0.12618	0.16062	0.19143	0.0695	0.12365	0.17882	0.19977	0.0773	0.12802	0.17877	0.20367
4	0.077925	0.1191	0.16097	0.1825	0.09545	0.13478	0.17235	0.19845	0.0856	0.1299	0.18105	0.19295
8	0.1545	0.12297	0.16067	0.18258	0.13865	0.12692	0.19467	0.2046	0.12495	0.13972	0.18705	0.19055
K	0.24238	0.2169	0.23545	0.2236	0.0418	0.0419	0.04185	0.041225	0.037925	0.038125	0.03675	0.0341
	16	8	4	2	16	8	4	2	16	8	4	2	FLC
Cg4
Fk506	1	2	3	4	5	6	7	8	9	10	11	12
0	0.13837	0.16875	0.22373	0.23057	0.12532	0.179	0.2072	0.24383	0.11973	0.1391	0.19207	0.20345
0.25	0.1097	0.12047	0.20425	0.2234	0.097275	0.12422	0.19208	0.217	0.09255	0.12495	0.16928	0.20888
0.5	0.1075	0.11772	0.2169	0.24058	0.097275	0.14713	0.2047	0.21842	0.095775	0.13458	0.17825	0.2324
1	0.12427	0.11543	0.1957	0.22643	0.09185	0.13125	0.1917	0.19287	0.095975	0.13447	0.1828	0.23148
2	0.1227	0.10558	0.19173	0.2387	0.10785	0.12912	0.19922	0.22595	0.09885	0.1244	0.19542	0.23762
4	0.13245	0.12538	0.2078	0.23033	0.12565	0.12663	0.19385	0.20925	0.1191	0.1404	0.19377	0.23615
8	0.13127	0.1214	0.20395	0.23098	0.15577	0.141	0.21083	0.22415	0.13893	0.13595	0.20122	0.2551
K	0.22752	0.22728	0.24367	0.22793	0.0416	0.040675	0.041525	0.041925	0.037625	0.036125	0.0359	0.035775
	8	4	2	1	8	4	2	1	8	4	2	1	FLC
Cg1
Fk506	1	2	3	4	5	6	7	8	9	10	11	12
0	0.13538	0.1641	0.1628	0.1811	0.13647	0.17108	0.1678	0.17853	0.1322	0.1668	0.184	0.1996
0.25	0.11012	0.12665	0.14452	0.1585	0.1077	0.1386	0.1381	0.1406	0.09905	0.12812	0.14402	0.17873
0.5	0.11772	0.12583	0.1345	0.13907	0.1017	0.13007	0.13287	0.134	0.094825	0.13183	0.14038	0.18812
1	0.10402	0.12657	0.14285	0.15245	0.08775	0.12473	0.13827	0.15725	0.0834	0.13677	0.13977	0.17843
2	0.0761	0.10575	0.12545	0.1296	0.0781	0.1135	0.12595	0.147	0.0887	0.11692	0.12522	0.16445
4	0.073875	0.0993	0.12013	0.12635	0.0641	0.0977	0.11497	0.13945	0.0683	0.1101	0.1181	0.1678
8	0.045175	0.0732	0.1086	0.1012	0.038925	0.08335	0.11212	0.14075	0.061925	0.08645	0.11038	0.13548
K	0.27152	0.22352	0.22982	0.23572	0.041025	0.041025	0.041925	0.0423	0.035975	0.03795	0.0352	0.035875
	1	0.5	0.25	0.125	1	0.5	0.25	0.125	1	0.5	0.25	0.125	ITC
Cg3
Fk506	1	2	3	4	5	6	7	8	9	10	11	12
0	0.067575	0.11887	0.15078	0.1552	0.06685	0.121	0.165	0.16552	0.0703	0.11093	0.15292	0.17633
0.25	0.055275	0.08425	0.12845	0.1493	0.05535	0.11483	0.15145	0.16462	0.051575	0.09725	0.13695	0.16902
0.5	0.0478	0.10768	0.1145	0.13762	0.04715	0.0922	0.13303	0.14505	0.04575	0.1107	0.1524	0.17208
1	0.042175	0.06025	0.11895	0.13745	0.044475	0.063125	0.12245	0.13938	0.04395	0.0654	0.13062	0.16545
2	0.042475	0.059775	0.12122	0.1299	0.0407	0.06425	0.12098	0.14292	0.04275	0.0654	0.12548	0.15625
4	0.04315	0.055675	0.11573	0.12735	0.044725	0.05945	0.11032	0.13563	0.044375	0.0573	0.11562	0.14608
8	0.038375	0.0573	0.078125	0.11677	0.042825	0.067675	0.086475	0.10898	0.035325	0.067275	0.11157	0.13585
K	0.25837	0.2309	0.2424	0.2322	0.039175	0.040775	0.040075	0.0397	0.03585	0.04805	0.03565	0.036275
	2	1	0.5	0.25	2	1	0.5	0.25	2	1	0.5	0.25	ITC
Cg4
Fk506	1	2	3	4	5	6	7	8	9	10	11	12
0	0.0552	0.09945	0.13958	0.15635	0.044975	0.10878	0.14363	0.15525	0.0745	0.10458	0.14128	0.17607
0.25	0.0499	0.04815	0.084075	0.14863	0.042625	0.056075	0.09945	0.16533	0.043025	0.05315	0.10695	0.17533
0.5	0.048975	0.055175	0.1143	0.1506	0.0459	0.058075	0.126	0.15865	0.044075	0.063975	0.11682	0.20423
1	0.05125	0.052925	0.097325	0.15073	0.043275	0.0546	0.11415	0.14542	0.051475	0.056925	0.11035	0.18215
2	0.049375	0.05495	0.071025	0.1423	0.04395	0.064275	0.0748	0.13638	0.049175	0.051	0.0757	0.15413
4	0.047175	0.060325	0.06915	0.13853	0.0456	0.057075	0.07395	0.12792	0.044425	0.050725	0.071775	0.14312
8	0.036825	0.067	0.08665	0.12448	0.03715	0.071375	0.084	0.12665	0.037325	0.070775	0.074775	0.13983
K	0.23498	0.23362	0.2423	0.20675	0.040375	0.039925	0.040075	0.0401	0.03465	0.034675	0.36173	0.0334
	2	1	0.5	0.25	2	1	0.5	0.25	2	1	0.5	0.25	ITC
Sc1
Fk506	1	2	3	4	5	6	7	8	9	10	11	12
0	0.0839	0.0931	0.09685	0.1246	0.07915	0.085975	0.094975	0.16578	0.066475	0.078925	0.10575	0.21203
0.25	0.057575	0.1004	0.11848	0.15777	0.049875	0.16297	0.14257	0.1231	0.0483	0.10243	0.12685	0.26195
0.5	0.044125	0.1742	0.15403	0.14042	0.03985	0.1678	0.139	0.13595	0.04045	0.18785	0.1046	0.22465
1	0.04285	0.05245	0.21373	0.26355	0.0403	0.044175	0.2063	0.16457	0.0396	0.09735	0.20515	0.27393
2	0.040125	0.041275	0.15223	0.1318	0.040075	0.0414	0.080275	0.14977	0.041325	0.042325	0.0855	0.1851
4	0.043475	0.0457	0.045225	0.1637	0.04095	0.04095	0.048625	0.19207	0.04205	0.04275	0.0469	0.136
8	0.04455	0.041875	0.042625	0.046125	0.0417	0.041175	0.04385	0.048925	0.043275	0.043225	0.04335	0.0452
K	0.187	0.14685	0.16097	0.1719	0.043125	0.04385	0.04295	0.04415	0.039825	0.03855	0.038425	0.038125
	16	8	4	2	16	8	4	2	16	8	4	2	FLC
Sc2
Fk506	1	2	3	4	5	6	7	8	9	10	11	12
0	0.06345	0.10473	0.13853	0.11482	0.052625	0.11187	0.13482	0.1435	0.057325	0.1224	0.17975	0.17028
0.25	0.0449	0.1291	0.11817	0.1665	0.041275	0.10915	0.16702	0.14395	0.0404	0.11617	0.17867	0.15012
0.5	0.040225	0.1437	0.16727	0.17323	0.1424	0.11483	0.189	0.18675	0.0382	0.1938	0.17905	0.18198
1	0.07775	0.14783	0.20172	0.19673	0.03715	0.15515	0.1578	0.20542	0.036725	0.18168	0.19935	0.24257
2	0.039575	0.096025	0.1442	0.17288	0.03765	0.10982	0.15222	0.19943	0.0384	0.13017	0.13742	0.19928
4	0.0432	0.043975	0.12472	0.1338	0.0404	0.03905	0.12857	0.13262	0.03965	0.042725	0.127	0.13555
8	0.044275	0.040875	0.043225	0.0808	0.041125	0.041625	0.041925	0.0772	0.04095	0.040375	0.042525	0.07495
K	0.17785	0.15328	0.14983	0.18195	0.041975	0.042575	0.0427	0.0428	0.0372	0.038975	0.03885	0.03825
	64	32	16	8	64	32	16	8	64	32	16	8	FLC
Sc3
Fk506	1	2	3	4	5	6	7	8	9	10	11	12
0	0.036475	0.080175	0.11965	0.1218	0.03545	0.061625	0.1066	0.10585	0.0352	0.0402	0.11142	0.12088
0.25	0.0365	0.034025	0.10395	0.1199	0.034	0.03515	0.11038	0.1304	0.0338	0.03375	0.12407	0.1179
0.5	0.0357	0.034225	0.036475	0.073675	0.034525	0.03505	0.037475	0.071625	0.034	0.03515	0.037	0.065225
1	0.034325	0.03425	0.0342	0.04775	0.0351	0.0353	0.03385	0.0415	0.0344	0.034725	0.035625	0.051775
2	0.033825	0.03465	0.034325	0.03555	0.03465	0.0336	0.033575	0.032925	0.03335	0.0338	0.035225	0.037825
4	0.03895	0.03495	0.038425	0.0343	0.039425	0.0366	0.0336	0.0348	0.034475	0.03445	0.03515	0.037175
8	0.03865	0.035375	0.034825	0.03565	0.0378	0.03625	0.035625	0.035475	0.036475	0.03815	0.037325	0.036575
K	0.15897	0.11583	0.14908	0.12063	0.04175	0.04	0.0407	0.042075	0.03525	0.0354	0.03605	0.0353
	32	16	8	4	32	16	8	4	32	16	8	4	FLC
Sc4
Fk506	1	2	3	4	5	6	7	8	9	10	11	12
0	0.038275	0.12785	0.09465	0.1364	0.047025	0.1143	0.12805	0.1155	0.03695	0.11375	0.13983	0.17097
0.25	0.042725	0.16005	0.1626	0.125	0.0378	0.13718	0.15663	0.11903	0.035625	0.14992	0.19495	0.14105
0.5	0.038175	0.13317	0.12503	0.13673	0.036875	0.1741	0.12317	0.14875	0.03745	0.21602	0.16052	0.14535
1	0.0368	0.13193	0.13122	0.11365	0.042525	0.13363	0.14415	0.1217	0.03645	0.13017	0.11863	0.1335
2	0.035725	0.057275	0.1426	0.13095	0.038225	0.074	0.11735	0.11835	0.0354	0.10285	0.12387	0.12805
4	0.039825	0.0503	0.10458	0.11035	0.038375	0.063925	0.1187	0.11568	0.0363	0.0527	0.13087	0.10498
8	0.04035	0.038975	0.0386	0.047275	0.0421	0.0474	0.0421	0.047475	0.03895	0.039475	0.046675	0.048525
K	0.12912	0.10607	0.13853	0.13052	0.0411	0.04125	0.041625	0.0414	0.037075	0.03605	0.037075	0.036825
	2	1	0.5	0.25	2	1	0.5	0.25	2	1	0.5	0.25	FLC
Sc5
Fk506	1	2	3	4	5	6	7	8	9	10	11	12
0	0.09485	0.12315	0.153	0.13787	0.04645	0.13015	0.16135	0.14483	0.098325	0.14195	0.1619	0.14402
0.25	0.086525	0.14218	0.1458	0.138	0.090375	0.14237	0.12765	0.13625	0.08505	0.14228	0.1432	0.14537
0.5	0.048575	0.1528	0.14605	0.13173	0.056975	0.1557	0.14565	0.12968	0.0624	0.16008	0.13747	0.1331
1	0.04005	0.11325	0.1569	0.11987	0.0408	0.12192	0.15438	0.13412	0.042725	0.14505	0.16148	0.13485
2	0.03985	0.048775	0.15448	0.14085	0.039675	0.047275	0.14715	0.1447	0.038875	0.0522	0.15163	0.13877
4	0.040725	0.044975	0.1267	0.14353	0.0397	0.041725	0.13425	0.14463	0.038575	0.04385	0.13328	0.13618
8	0.044275	0.0403	0.0449	0.0607	0.04165	0.041775	0.044425	0.08005	0.04085	0.04245	0.046425	0.077125
K	0.17213	0.13365	0.1437	0.16322	0.043125	0.042925	0.0431	0.044425	0.038975	0.0389	0.037675	0.03875
	8	4	2	1	8	4	2	1	8	4	2	1	FLC
Sc6
Fk506	1	2	3	4	5	6	7	8	9	10	11	12
0	0.045225	0.054375	0.12107	0.11918	0.039925	0.057725	0.1314	0.1281	0.040575	0.0595	0.125	0.12087
0.25	0.0403	0.063475	0.1226	0.12075	0.03715	0.046775	0.1564	0.14318	0.0385	0.0515	0.14425	0.1374
0.5	0.03735	0.0531	0.092525	0.1101	0.037475	0.050125	0.093675	0.1131	0.0373	0.04745	0.094775	0.10855
1	0.038475	0.039525	0.053275	0.058825	0.038825	0.04025	0.04965	0.0579	0.03755	0.039675	0.049975	0.0591
2	0.038375	0.03775	0.041075	0.044425	0.03785	0.038875	0.042225	0.0468	0.037025	0.0403	0.042	0.05255
4	0.039425	0.04025	0.04285	0.045275	0.037625	0.038	0.039225	0.0414	0.04025	0.04035	0.0433	0.0439
8	0.040225	0.040325	0.03985	0.041725	0.0402	0.040175	0.04065	0.040825	0.04045	0.04095	0.041375	0.04135
K	0.13427	0.1357	0.1055	0.13252	0.04125	0.04135	0.04235	0.042225	0.03905	0.03715	0.0381	0.039375
	16	8	4	2	16	8	4	2	16	8	4	2	FLC
Cg5
Fk506	1	2	3	4	5	6	7	8	9	10	11	12
0	0.0694	0.24815	0.26777	0.25587	0.067025	0.23618	0.23138	0.244	0.056275	0.23647	0.2538	0.2653
0.25	0.0831	0.22125	0.24018	0.199	0.08065	0.24968	0.2156	0.22628	0.056525	0.17763	0.22402	0.24937
0.5	0.073025	0.1802	0.20593	0.18722	0.048925	0.1958	0.19982	0.20822	0.042825	0.15333	0.18047	0.2333
1	0.0641	0.13903	0.18807	0.1865	0.046025	0.18158	0.20692	0.20227	0.0565	0.1724	0.21585	0.23047
2	0.04955	0.16138	0.18785	0.1761	0.05825	0.19162	0.2009	0.19895	0.036775	0.17472	0.19862	0.24008
4	0.044775	0.13908	0.18275	0.16822	0.039125	0.177	0.19588	0.18542	0.03505	0.1636	0.19267	0.2103
8	0.0392	0.14832	0.19207	0.18002	0.03775	0.1747	0.20257	0.19078	0.037625	0.14658	0.18195	0.20475
K	0.24867	0.23175	0.23775	0.22723	0.040225	0.0397	0.0402	0.040125	0.035625	0.036225	0.0345	0.035275
	128	64	32	16	128	64	32	16	128	64	32	16	FLC
Cg6
Fk506	1	2	3	4	5	6	7	8	9	10	11	12
0	0.04405	0.048	0.2505	0.23292	0.04065	0.050775	0.25062	0.20445	0.0403	0.05175	0.1906	0.26783
0.25	0.039675	0.051225	0.1491	0.25655	0.035875	0.0438	0.1601	0.18532	0.035625	0.045	0.2246	0.1788
0.5	0.039275	0.05125	0.13363	0.17082	0.0369	0.0558	0.15947	0.16243	0.036825	0.054675	0.2166	0.17208
1	0.037125	0.0364	0.0676	0.15043	0.037	0.036925	0.0514	0.12735	0.03725	0.03585	0.039975	0.1971
2	0.037125	0.036275	0.05555	0.11475	0.036975	0.03695	0.037225	0.13978	0.037025	0.036525	0.0366	0.14578
4	0.038325	0.03655	0.036725	0.0653	0.03885	0.03655	0.03685	0.12242	0.03665	0.0366	0.036675	0.13232
8	0.04015	0.039575	0.03905	0.0399	0.041325	0.038825	0.0403	0.0419	0.038425	0.0399	0.040025	0.0425
K	0.24053	0.22665	0.21995	0.22835	0.042275	0.0421	0.0423	0.0423	0.04055	0.038375	0.039725	0.0373
	256	128	64	32	256	128	64	32	256	128	64	32	FLC
Sc1
Fk506	1	2	3	4	5	6	7	8	9	10	11	12
0	0.085225	0.080325	0.10825	0.23908	0.06755	0.0798	0.10588	0.2042	0.073825	0.074325	0.12247	0.26178
0.25	0.0423	0.044725	0.064175	0.18965	0.041775	0.0433	0.07175	0.20265	0.0399	0.039675	0.0706	0.19552
0.5	0.04195	0.042125	0.04455	0.0966	0.040575	0.040925	0.043	0.1313	0.041525	0.042425	0.0488	0.15112
1	0.045125	0.043425	0.043225	0.07075	0.0418	0.042225	0.04365	0.08505	0.04345	0.04115	0.044325	0.080325
2	0.04345	0.040425	0.04115	0.0446	0.0417	0.040225	0.040725	0.0434	0.040325	0.04315	0.039625	0.043475
4	0.047175	0.043	0.039225	0.04295	0.04175	0.040625	0.04245	0.04225	0.0405	0.041475	0.042375	0.0415
8	0.0476	0.040075	0.04115	0.04285	0.043175	0.0407	0.041225	0.04095	0.04185	0.043325	0.0412	0.043125
K	0.25587	0.1869	0.1963	0.2982	0.041875	0.041375	0.043025	0.0425	0.05895	0.03765	0.038375	0.0377
	4	2	1	0.5	4	2	1	0.5	4	2	1	0.5	ITC
Sc2
Fk506	1	2	3	4	5	6	7	8	9	10	11	12
0	0.0935	0.14855	0.18807	0.15727	0.094675	0.16425	0.15092	0.15952	0.09315	0.1575	0.22993	0.1839
0.25	0.0892	0.20425	0.15337	0.20662	0.071	0.18398	0.2036	0.14605	0.081325	0.19755	0.229	0.16762
0.5	0.05075	0.099875	0.1402	0.16575	0.049375	0.09665	0.14415	0.2136	0.0482	0.11567	0.13318	0.13727
1	0.055175	0.04845	0.11515	0.15415	0.0415	0.082925	0.15833	0.16647	0.042025	0.047525	0.13535	0.1473
2	0.0435	0.040575	0.11173	0.15518	0.03855	0.0393	0.0808	0.1738	0.03905	0.042375	0.09295	0.12632
4	0.043375	0.0389	0.038125	0.045375	0.03855	0.0365	0.0585	0.07065	0.041475	0.038525	0.042525	0.070375
8	0.04495	0.039725	0.03845	0.0409	0.041225	0.0385	0.03975	0.039175	0.05455	0.040625	0.0395	0.0412
K	0.25848	0.15432	0.14233	0.2159	0.03955	0.0408	0.04025	0.04215	0.037525	0.03645	0.03605	0.035625
	4	2	1	0.5	4	2	1	0.5	4	2	1	0.5	ITC
Sc3
Fk506	1	2	3	4	5	6	7	8	9	10	11	12
0	0.054	0.04375	0.057875	0.12708	0.04365	0.04005	0.0559	0.1171	0.043875	0.039075	0.057875	0.11195
0.25	0.04405	0.036725	0.036925	0.04095	0.0401	0.03795	0.037075	0.046125	0.041125	0.036275	0.0366	0.0463
0.5	0.040925	0.037325	0.0372	0.03675	0.0404	0.0368	0.036475	0.03655	0.03975	0.03625	0.036275	0.038375
1	0.04065	0.0371	0.035425	0.035425	0.040525	0.038075	0.03665	0.03505	0.041875	0.0382	0.037375	0.035475
2	0.04195	0.036775	0.0377	0.035675	0.04115	0.03555	0.037025	0.03775	0.041975	0.037175	0.037625	0.038225
4	0.04535	0.038175	0.03665	0.03685	0.04245	0.037725	0.037525	0.037175	0.041	0.03785	0.037725	0.03805
8	0.04745	0.038775	0.04015	0.040825	0.046175	0.039675	0.039275	0.039825	0.04395	0.037425	0.03935	0.039
K	0.13262	0.12875	0.127	0.1285	0.042125	0.0424	0.043275	0.0429	0.037875	0.03685	0.048375	0.03615
	8	4	2	1	8	4	2	1	8	4	2	1	ITC
Sc4
Fk506	1	2	3	4	5	6	7	8	9	10	11	12
0	0.03915	0.036475	0.096375	0.1303	0.0358	0.03605	0.0977	0.14775	0.034575	0.037275	0.12278	0.13277
0.25	0.037175	0.036375	0.044675	0.18837	0.035325	0.034175	0.0432	0.15245	0.0355	0.0348	0.044	0.1736
0.5	0.037325	0.034325	0.036025	0.11738	0.035375	0.03555	0.035625	0.063025	0.033425	0.035575	0.039475	0.10692
1	0.03515	0.035175	0.033925	0.036375	0.035225	0.03505	0.034875	0.03535	0.033575	0.035425	0.036275	0.035375
2	0.03545	0.035025	0.034775	0.0698	0.0347	0.0845	0.0824	0.035425	0.035275	0.036275	0.059325	0.03505
4	0.038975	0.035575	0.052575	0.047775	0.0342	0.035625	0.0349	0.034775	0.034975	0.0374	0.03585	0.034725
8	0.0381	0.03815	0.036725	0.039275	0.03645	0.03755	0.03745	0.036325	0.037775	0.03745	0.037075	0.039
K	0.15725	0.15145	0.11852	0.15303	0.040625	0.039575	0.040025	0.0396	0.0369	0.03595	0.0356	0.035175
	2	1	0.5	0.25	2	1	0.5	0.25	2	1	0.5	0.25	ITC
Sc5
Fk506	1	2	3	4	5	6	7	8	9	10	11	12
0	0.055525	0.055325	0.13115	0.14578	0.050775	0.053275	0.13525	0.14213	0.0477	0.0505	0.141	0.16585
0.25	0.043025	0.038075	0.0415	0.13778	0.039725	0.03805	0.046275	0.13772	0.039575	0.038275	0.042675	0.14722
0.5	0.04045	0.0385	0.03865	0.0701	0.0402	0.037575	0.03815	0.079425	0.03905	0.0379	0.03905	0.086225
1	0.04015	0.038525	0.0417	0.038975	0.04	0.0381	0.04015	0.039375	0.040225	0.03835	0.0387	0.03945
2	0.0421	0.039725	0.0382	0.038075	0.039225	0.0374	0.037925	0.039075	0.04035	0.038	0.036825	0.0378
4	0.047675	0.03815	0.038975	0.03855	0.039875	0.038825	0.03905	0.0387	0.04125	0.037425	0.03865	0.03915
8	0.046425	0.0427	0.0411	0.0406	0.041975	0.0421	0.04265	0.04245	0.04375	0.0438	0.043	0.041175
K	0.1822	0.14668	0.1337	0.16512	0.043675	0.043525	0.044525	0.042875	0.038425	0.0399	0.041025	0.036775
	4	2	1	0.5	4	2	1	0.5	4	2	1	0.5	ITC
Cg2
Fk506	1	2	3	4	5	6	7	8	9	10	11	12
0	0.0389	0.10785	0.17327	0.21562	0.03935	0.10907	0.14977	0.19145	0.039975	0.10522	0.16637	0.21002
0.25	0.036175	0.0446	0.069	0.10442	0.0346	0.045625	0.061475	0.1313	0.07575	0.0621	0.0703	0.17675
0.5	0.036125	0.05265	0.05875	0.11578	0.03725	0.0446	0.062175	0.099275	0.034075	0.04845	0.0674	0.15863
1	0.038	0.04355	0.069625	0.14443	0.0347	0.054475	0.0884	0.1415	0.035675	0.054175	0.086425	0.16235
2	0.0369	0.0524	0.13148	0.16572	0.0351	0.054	0.14092	0.17245	0.03705	0.053325	0.1207	0.1702
4	0.04275	0.052125	0.11313	0.14847	0.0375	0.052825	0.12865	0.15128	0.039	0.0522	0.13287	0.16183
8	0.040875	0.052125	0.12355	0.14112	0.03835	0.0554	0.12675	0.147	0.039	0.053625	0.12205	0.1519
K	0.19905	0.2101	0.21745	0.21362	0.041	0.0404	0.041	0.0408	0.036125	0.03645	0.03515	0.03685
	1	0.5	0.25	0.125	1	0.5	0.25	0.125	1	0.5	0.25	0.125	ITC
Cg5
Fk506	1	2	3	4	5	6	7	8	9	10	11	12
0	0.1861	0.21698	0.24917	0.25047	0.17505	0.23133	0.25425	0.25385	0.1832	0.2145	0.2436	0.26743
0.25	0.12703	0.16052	0.18608	0.2327	0.1049	0.17108	0.19052	0.2365	0.12735	0.16887	0.15875	0.25558
0.5	0.10615	0.13868	0.16383	0.26545	0.095325	0.17533	0.18092	0.22525	0.10643	0.13522	0.15137	0.228
1	0.09945	0.1147	0.10757	0.24145	0.0928	0.14088	0.12927	0.23755	0.094475	0.11985	0.1246	0.25203
2	0.1003	0.06965	0.10515	0.1646	0.09875	0.088825	0.11193	0.1853	0.08265	0.079125	0.10162	0.21007
4	0.092825	0.080125	0.0868	0.14668	0.064575	0.0707	0.0915	0.17485	0.09275	0.09175	0.09235	0.18362
8	0.0762	0.06215	0.067125	0.1452	0.072825	0.06915	0.08185	0.15925	0.0698	0.065	0.067275	0.13545
K	0.3155	0.258	0.22682	0.2747	0.0409	0.04205	0.041625	0.041075	0.038	0.03965	0.0376	0.0365
	8	4	2	1	8	4	2	1	8	4	2	1	ITC
Cg6
Fk506	1	2	3	4	5	6	7	8	9	10	11	12
0	0.2803	0.24043	0.24042	0.25582	0.25313	0.25315	0.24077	0.24322	0.25533	0.2445	0.24387	0.2451
0.25	0.18535	0.15247	0.14935	0.15875	0.17063	0.14038	0.1372	0.14372	0.15215	0.13023	0.11518	0.15125
0.5	0.16035	0.11453	0.11428	0.16723	0.13097	0.10778	0.12828	0.13945	0.13872	0.12325	0.1063	0.15423
1	0.10865	0.07065	0.086925	0.09405	0.0946	0.070325	0.065325	0.10502	0.086925	0.0681	0.06085	0.09385
2	0.0915	0.055425	0.047575	0.078	0.08305	0.069025	0.053625	0.06135	0.07595	0.0593	0.056425	0.051775
4	0.08645	0.056525	0.04655	0.04155	0.083475	0.057325	0.0458	0.041875	0.087125	0.05765	0.04685	0.047225
8	0.0799	0.057175	0.04735	0.041875	0.075175	0.061175	0.049075	0.04415	0.0768	0.058775	0.04675	0.046925
K	0.28707	0.22662	0.24972	0.25842	0.0438	0.044275	0.0434	0.044975	0.040225	0.03975	0.038075	0.03895
	32	16	8	4	32	16	8	4	32	16	8	4	ITC
Sc1
Fk506	1	2	3	4	5	6	7	8	9	10	11	12
0	0.0491	0.10985	0.15403	0.15362	0.0437	0.10582	0.11638	0.12138	0.04135	0.10447	0.11438	0.14992
0.25	0.03815	0.038	0.0392	0.05965	0.03785	0.0379	0.0393	0.083925	0.036875	0.037	0.039875	0.2026
0.5	0.038075	0.037775	0.036525	0.039475	0.037975	0.0373	0.0376	0.0407	0.0364	0.0384	0.037325	0.041625
1	0.04085	0.036375	0.036625	0.037975	0.039025	0.0384	0.03715	0.036775	0.037075	0.03645	0.037075	0.039425
2	0.0631	0.0377	0.037375	0.0377	0.039275	0.038125	0.03815	0.03795	0.03775	0.03645	0.03685	0.0402
4	0.04125	0.0422	0.037675	0.039425	0.042075	0.0375	0.03805	0.0426	0.04315	0.039525	0.041625	0.0536
8	0.04175	0.039975	0.039975	0.0497	0.0393	0.041075	0.0445	0.069375	0.04	0.041375	0.0479	0.1285
K	0.18065	0.1713	0.19555	0.18203	0.042575	0.042625	0.043175	0.043425	0.04105	0.039375	0.0414	0.0399
	0.5	0.25	0.125	0.0625	0.5	0.25	0.125	0.0625	0.5	0.25	0.125	0.0625	AMB
Sc3
Fk506	1	2	3	4	5	6	7	8	9	10	11	12
0	0.12022	0.1009	0.1128	0.11385	0.1003	0.11107	0.114	0.11107	0.0986	0.11062	0.11478	0.11085
0.25	0.039525	0.037425	0.048025	0.095025	0.040825	0.039375	0.0425	0.086725	0.0385	0.03915	0.04495	0.0832
0.5	0.038725	0.0382	0.039575	0.04955	0.03985	0.0386	0.040075	0.05135	0.041425	0.037725	0.039875	0.054075
1	0.039425	0.03935	0.039025	0.062125	0.039125	0.04015	0.04055	0.066725	0.040275	0.04005	0.0423	0.066225
2	0.04105	0.0399	0.046075	0.077825	0.041575	0.039025	0.042675	0.06495	0.0398	0.040175	0.042575	0.06215
4	0.048475	0.0431	0.048875	0.056575	0.042525	0.0428	0.047225	0.055775	0.042325	0.04355	0.046725	0.05365
8	0.04355	0.04325	0.0451	0.04775	0.042325	0.043	0.042525	0.046225	0.0409	0.041425	0.04395	0.0441
K	0.12495	0.1168	0.15245	0.06095	0.044225	0.045775	0.0443	0.04265	0.042475	0.046825	0.03885	0.03935
	0.125	0.0625	0.03125	0.015625	0.125	0.0625	0.03125	0.015625	0.125	0.0625	0.03125	0.015625	AMB
Sc4
Fk506	1	2	3	4	5	6	7	8	9	10	11	12
0	0.16665	0.16248	0.16942	0.098775	0.10825	0.13653	0.15755	0.11768	0.1435	0.17267	0.14732	0.16978
0.25	0.08915	0.1354	0.14213	0.18512	0.090175	0.1303	0.16412	0.19695	0.074525	0.13802	0.17638	0.1415
0.5	0.06795	0.14038	0.16182	0.1417	0.066825	0.13013	0.15552	0.1498	0.058825	0.1465	0.15412	0.1284
1	0.082025	0.14068	0.1467	0.139	0.07825	0.13428	0.14167	0.14645	0.0812	0.1181	0.149	0.13115
2	0.06635	0.10373	0.135	0.1187	0.1007	0.12975	0.1279	0.13868	0.077175	0.1194	0.12805	0.14112
4	0.06265	0.07355	0.08595	0.10135	0.0635	0.08385	0.10837	0.12353	0.052775	0.10292	0.09595	0.10403
8	0.04185	0.041675	0.0412	0.040075	0.038625	0.04015	0.042725	0.042325	0.04005	0.041875	0.040225	0.0415
K	0.13637	0.11865	0.1351	0.11742	0.0433	0.043725	0.043075	0.044425	0.052075	0.037375	0.037825	0.03975
	0.03125	0.015625	0.0078125	0.00390625	0.03125	0.015625	0.0078125	0.00390625	0.03125	0.015625	0.0078125	0.00390625	AMB
Sc5
Fk506	1	2	3	4	5	6	7	8	9	10	11	12
0	0.11807	0.1161	0.12677	0.11585	0.11947	0.12415	0.11748	0.1238	0.10182	0.12192	0.11105	0.13335
0.25	0.040975	0.097925	0.10127	0.1126	0.037475	0.1102	0.11282	0.1136	0.03605	0.1059	0.12135	0.12005
0.5	0.037475	0.063275	0.13387	0.11963	0.03785	0.0458	0.1103	0.10718	0.03675	0.054225	0.10795	0.11652
1	0.037125	0.04255	0.11232	0.1034	0.037125	0.041175	0.1161	0.1114	0.03585	0.040675	0.12325	0.11527
2	0.037775	0.04915	0.1135	0.11807	0.038325	0.041175	0.11107	0.095825	0.037125	0.04215	0.11087	0.11795
4	0.0435	0.0656	0.11185	0.1296	0.04065	0.060925	0.11878	0.12027	0.0394	0.067875	0.13522	0.12968
8	0.040375	0.049825	0.09645	0.11615	0.03855	0.053475	0.1056	0.11803	0.039525	0.079575	0.13002	0.12605
K	0.14423	0.12905	0.10683	0.1334	0.0427	0.041925	0.04315	0.0449	0.042025	0.04955	0.040675	0.0403
	0.125	0.0625	0.03125	0.015625	0.125	0.0625	0.03125	0.015625	0.125	0.0625	0.03125	0.015625	AMB
Sc6
Fk506	1	2	3	4	5	6	7	8	9	10	11	12
0	0.14412	0.14327	0.1442	0.1322	0.1295	0.13537	0.14423	0.13598	0.1749	0.1539	0.14648	0.14807
0.25	0.040025	0.08665	0.11463	0.1149	0.037325	0.10535	0.12035	0.12037	0.036825	0.10697	0.12352	0.1158
0.5	0.038825	0.0616	0.10905	0.1246	0.0365	0.075925	0.11798	0.12212	0.036425	0.084	0.1284	0.11507
1	0.0405	0.06115	0.1111	0.10052	0.03665	0.062225	0.1051	0.11965	0.037875	0.069425	0.11623	0.11615
2	0.0407	0.05365	0.069625	0.09325	0.0385	0.053525	0.093875	0.10825	0.0396	0.0619	0.09355	0.097825
4	0.049575	0.049175	0.058475	0.059125	0.040325	0.05275	0.058975	0.0685	0.045225	0.0563	0.061	0.0681
8	0.044425	0.0433	0.043825	0.04545	0.038975	0.04375	0.04355	0.044825	0.0417	0.0442	0.044825	0.045675
K	0.1175	0.0943	0.17288	0.1407	0.0422	0.045075	0.043925	0.042975	0.043325	0.0401	0.038625	0.0387
	0.0625	0.03125	0.015625	0.0078125	0.0625	0.03125	0.015625	0.0078125	0.0625	0.03125	0.015625	0.0078125	AMB
Cg2
Fk506	1	2	3	4	5	6	7	8	9	10	11	12
0	0.13033	0.1209	0.15743	0.16013	0.10797	0.12427	0.1554	0.17217	0.11115	0.1285	0.13148	0.17788
0.25	0.04015	0.11005	0.1042	0.1192	0.03905	0.0704	0.1103	0.1233	0.03855	0.10275	0.10935	0.15288
0.5	0.040825	0.039175	0.1112	0.12298	0.038425	0.03835	0.11835	0.11987	0.039725	0.040225	0.11477	0.14148
1	0.042075	0.03895	0.12268	0.11748	0.0393	0.037825	0.11823	0.12458	0.039925	0.037825	0.11575	0.1364
2	0.0422	0.039675	0.12525	0.12545	0.041225	0.03795	0.12325	0.1226	0.04175	0.03865	0.12343	0.1475
4	0.0483	0.04245	0.13185	0.138	0.040925	0.041375	0.1261	0.13473	0.040775	0.041775	0.12708	0.15397
8	0.0436	0.042825	0.1397	0.13563	0.04075	0.041675	0.149	0.14103	0.047275	0.054425	0.12398	0.15065
K	0.2408	0.18067	0.17638	0.2109	0.0431	0.0454	0.044475	0.043625	0.040475	0.04165	0.0412	0.0412
	0.5	0.25	0.125	0.0625	0.5	0.25	0.125	0.0625	0.5	0.25	0.125	0.0625	AMB
Cg4
Fk506	1	2	3	4	5	6	7	8	9	10	11	12
0	0.09435	0.1281	0.1352	0.17068	0.083925	0.1207	0.13322	0.14835	0.075225	0.11585	0.1428	0.15667
0.25	0.035875	0.10522	0.11357	0.12848	0.03355	0.096275	0.11087	0.13402	0.034025	0.091125	0.10428	0.14573
0.5	0.03485	0.061675	0.11593	0.13997	0.03395	0.033275	0.11383	0.11308	0.0334	0.04415	0.10737	0.13752
1	0.036975	0.03375	0.13203	0.15888	0.034425	0.033975	0.12822	0.14523	0.034675	0.03315	0.1288	0.14912
2	0.04115	0.033675	0.1407	0.14382	0.0348	0.034125	0.13177	0.13273	0.037	0.034975	0.12587	0.17862
4	0.043575	0.034825	0.12465	0.1427	0.0367	0.03505	0.13625	0.12697	0.036775	0.038975	0.13442	0.18215
8	0.03745	0.038375	0.1279	0.13565	0.036425	0.037175	0.15	0.1429	0.037275	0.0455	0.1198	0.1686
K	0.2425	0.22215	0.21662	0.23135	0.040575	0.039525	0.039475	0.038875	0.0351	0.038275	0.03645	0.035175
	0.5	0.25	0.125	0.0625	0.5	0.25	0.125	0.0625	0.5	0.25	0.125	0.0625	AMB
Cg6
Fk506	1	2	3	4	5	6	7	8	9	10	11	12
0	0.16655	0.1916	0.18798	0.1994	0.1373	0.20285	0.21263	0.19973	0.099375	0.18947	0.1938	0.21697
0.25	0.11272	0.14342	0.15375	0.22973	0.079425	0.15332	0.18595	0.18735	0.085	0.13668	0.16293	0.21923
0.5	0.07745	0.12313	0.1729	0.19825	0.0505	0.12655	0.17932	0.19258	0.0727	0.13287	0.16032	0.18372
1	0.1097	0.12467	0.1791	0.2136	0.05115	0.13798	0.17517	0.20648	0.072	0.12925	0.18005	0.19523
2	0.12108	0.12202	0.17083	0.2057	0.074	0.12775	0.17903	0.20718	0.1015	0.13695	0.18	0.1994
4	0.13927	0.108	0.16195	0.1383	0.11218	0.13922	0.14502	0.15885	0.1064	0.13248	0.13723	0.17527
8	0.1077	0.10808	0.13092	0.14693	0.10303	0.13682	0.1626	0.15943	0.0963	0.13092	0.12665	0.15848
K	0.27375	0.24335	0.2355	0.23005	0.04365	0.041575	0.046075	0.043425	0.040475	0.0397	0.037775	0.0392
	0.125	0.0625	0.03125	0.015625	0.125	0.0625	0.03125	0.015625	0.125	0.0625	0.03125	0.015625	AMB
Sc1
AMX	1	2	3	4	5	6	7	8	9	10	11	12
0	0.0417	0.07725	0.1197	0.088975	0.038575	0.0827	0.091675	0.09615	0.039075	0.0868	0.08545	0.12352
6.25	0.039	0.09295	0.085025	0.12642	0.036175	0.0808	0.11838	0.1038	0.080625	0.0829	0.091675	0.12233
12.5	0.040575	0.08005	0.13013	0.1218	0.040475	0.0749	0.094775	0.1335	0.04245	0.1136	0.083775	0.1289
25	0.042575	0.07165	0.09825	0.113	0.038425	0.069975	0.12182	0.12718	0.037625	0.11425	0.11272	0.13442
50	0.03985	0.0804	0.13268	0.10723	0.0484	0.072125	0.11062	0.1228	0.04645	0.1157	0.1146	0.12493
100	0.042225	0.1058	0.10285	0.11775	0.03645	0.085375	0.10162	0.12417	0.036325	0.1303	0.15065	0.12533
200	0.03955	0.13075	0.106	0.11805	0.038225	0.15852	0.11338	0.11885	0.037475	0.12457	0.13813	0.17105
K	0.17163	0.16412	0.15405	0.21617	0.041975	0.041775	0.0431	0.041775	0.039025	0.039925	0.0381	0.037975
	1	0.5	0.25	0.125	1	0.5	0.25	0.125	1	0.5	0.25	0.125	AMB
Sc2
AMX	1	2	3	4	5	6	7	8	9	10	11	12
0	0.046825	0.11403	0.10765	0.12093	0.04515	0.10327	0.10685	0.13543	0.0417	0.11053	0.1125	0.12845
6.25	0.0457	0.1121	0.095025	0.11953	0.040675	0.098675	0.10465	0.1338	0.0428	0.09675	0.12282	0.12467
12.5	0.041675	0.11327	0.10207	0.12207	0.042	0.11383	0.12022	0.1218	0.04165	0.11498	0.13047	0.12462
25	0.0445	0.1184	0.09835	0.11107	0.04085	0.12207	0.1034	0.1181	0.040025	0.11938	0.11632	0.12313
50	0.04375	0.10078	0.13907	0.10058	0.04105	0.12147	0.10987	0.10725	0.043375	0.1071	0.1071	0.11462
100	0.04245	0.11022	0.12415	0.095	0.058925	0.0929	0.11523	0.1262	0.051175	0.13545	0.1135	0.1231
200	0.043325	0.11545	0.10075	0.11795	0.04135	0.17808	0.14922	0.129	0.039175	0.11822	0.11653	0.14285
K	0.21332	0.1627	0.15252	0.20415	0.043375	0.041475	0.041575	0.044375	0.060525	0.0403	0.041025	0.0395
	1	0.5	0.25	0.125	1	0.5	0.25	0.125	1	0.5	0.25	0.125	AMB
Sc3
AMX	1	2	3	4	5	6	7	8	9	10	11	12
0	0.052025	0.12385	0.11987	0.12755	0.0516	0.12195	0.12655	0.12668	0.070875	0.1185	0.12732	0.13207
6.25	0.064125	0.13803	0.10645	0.14823	0.06645	0.126	0.13318	0.13217	0.06595	0.1267	0.1341	0.11255
12.5	0.045275	0.13335	0.14867	0.14697	0.052925	0.13755	0.14545	0.15365	0.070825	0.14247	0.13853	0.14513
25	0.056325	0.14208	0.14067	0.14457	0.068225	0.12765	0.14793	0.15168	0.087675	0.1357	0.1436	0.12402
50	0.055575	0.134	0.13642	0.1414	0.072875	0.13078	0.13665	0.13518	0.091575	0.1365	0.14173	0.1354
100	0.046575	0.13832	0.13993	0.14558	0.0722	0.13375	0.14202	0.14083	0.04625	0.14205	0.14487	0.13435
200	0.052425	0.13725	0.13315	0.12873	0.070875	0.1212	0.13815	0.13925	0.05165	0.14577	0.14715	0.14135
K	0.12718	0.1348	0.1332	0.1387	0.051875	0.0473	0.048575	0.051925	0.040975	0.039725	0.040475	0.0541
	0.25	0.125	0.0625	0.03125	0.25	0.125	0.0625	0.03125	0.25	0.125	0.0625	0.03125	AMB
Sc4
AMX	1	2	3	4	5	6	7	8	9	10	11	12
0	0.12113	0.13682	0.1117	0.11752	0.094525	0.1115	0.14028	0.13425	0.11455	0.11568	0.1335	0.12695
6.25	0.11878	0.10635	0.13152	0.1209	0.10743	0.13495	0.15275	0.13283	0.12365	0.10388	0.10535	0.13952
12.5	0.1123	0.1125	0.1242	0.13498	0.099225	0.1437	0.13685	0.15512	0.11118	0.11167	0.13047	0.14372
25	0.12965	0.1171	0.12445	0.11558	0.12657	0.12192	0.15563	0.1218	0.12035	0.10685	0.09465	0.1609
50	0.1171	0.10927	0.12407	0.1409	0.098625	0.1355	0.1294	0.16183	0.11762	0.12603	0.127	0.1528
100	0.12053	0.13285	0.11795	0.13557	0.12507	0.16058	0.13047	0.1257	0.14333	0.15117	0.12072	0.1522
200	0.15605	0.14665	0.16055	0.14565	0.12495	0.14983	0.15112	0.13207	0.16255	0.21315	0.10847	0.14797
K	0.16078	0.13752	0.1262	0.16972	0.042075	0.042625	0.04275	0.042175	0.038975	0.0505	0.054775	0.049375
	0.125	0.0625	0.03125	0.015625	0.125	0.0625	0.03125	0.015625	0.125	0.0625	0.03125	0.015625	AMB
Sc5
AMX	1	2	3	4	5	6	7	8	9	10	11	12
0	0.12202	0.12745	0.13132	0.12732	0.10908	0.10935	0.1209	0.1343	0.097375	0.11	0.11985	0.14623
6.25	0.11345	0.11162	0.1102	0.12625	0.10037	0.10165	0.11938	0.10998	0.098	0.10585	0.1096	0.13315
12.5	0.11522	0.1115	0.12992	0.13375	0.10307	0.118	0.12083	0.12622	0.10383	0.11615	0.11977	0.13
25	0.11318	0.1133	0.12558	0.13252	0.10705	0.1344	0.13825	0.13778	0.096625	0.11742	0.11455	0.1365
50	0.11823	0.11645	0.13275	0.14485	0.10495	0.118	0.13117	0.13878	0.11052	0.11695	0.10652	0.11558
100	0.1211	0.0982	0.12822	0.14038	0.11282	0.11902	0.13318	0.12535	0.10352	0.11865	0.12445	0.13328
200	0.12585	0.13368	0.12587	0.12798	0.11555	0.12438	0.13483	0.133	0.1097	0.11465	0.11525	0.1195
K	0.1403	0.1337	0.14057	0.16692	0.043025	0.04395	0.04425	0.0434	0.039175	0.03795	0.038775	0.040375
	0.25	0.125	0.0625	0.03125	0.25	0.125	0.0625	0.03125	0.25	0.125	0.0625	0.03125	AMB
Sc6
AMX	1	2	3	4	5	6	7	8	9	10	11	12
0	0.15982	0.13633	0.1267	0.13743	0.1117	0.12857	0.13297	0.125	0.14318	0.12937	0.16565	0.1311
6.25	0.12552	0.1208	0.16463	0.15583	0.1134	0.13205	0.11098	0.13335	0.08835	0.0862	0.1013	0.14193
12.5	0.093175	0.13232	0.13318	0.12703	0.12153	0.0951	0.0972	0.1394	0.096875	0.13318	0.10508	0.14543
25	0.13695	0.13948	0.12385	0.11945	0.12448	0.11698	0.12708	0.1177	0.11005	0.134	0.14038	0.1442
50	0.13518	0.1365	0.09235	0.11553	0.1131	0.12348	0.14125	0.14513	0.12027	0.13745	0.1351	0.14122
100	0.1132	0.11513	0.1221	0.11408	0.12157	0.14203	0.12913	0.11732	0.11	0.11105	0.14105	0.15127
200	0.13692	0.15262	0.12148	0.13912	0.12558	0.10833	0.1059	0.14398	0.10442	0.13403	0.14052	0.14697
K	0.12525	0.12422	0.11963	0.12735	0.042775	0.042675	0.04225	0.0432	0.04055	0.0437	0.038325	0.041825
	0.0635455	0.352381	-0.206496	0.259315	0.0635455	0.352381	-0.206496	0.259315	0.0635455	0.352381	-0.206496	0.259315	AMB
Cg1
AMX	1	2	3	4	5	6	7	8	9	10	11	12
0	0.13262	0.14735	0.16392	0.15905	0.10367	0.1353	0.1488	0.14735	0.12348	0.14683	0.1495	0.18605
6.25	0.11265	0.11077	0.1225	0.11485	0.09205	0.11708	0.12423	0.12697	0.091725	0.10323	0.10935	0.15207
12.5	0.1438	0.11107	0.1207	0.144	0.081975	0.11892	0.1362	0.12667	0.072375	0.1108	0.11553	0.1574
25	0.13923	0.12583	0.13392	0.16167	0.090875	0.13223	0.15947	0.15655	0.077475	0.1178	0.1332	0.15978
50	0.13563	0.12857	0.14285	0.15245	0.090075	0.15315	0.16763	0.16275	0.077225	0.13415	0.1197	0.15817
100	0.14357	0.11507	0.1478	0.15318	0.089175	0.1252	0.17898	0.1565	0.0771	0.1285	0.13205	0.154
200	0.13983	0.1234	0.14665	0.16125	0.10092	0.16663	0.19075	0.20243	0.085325	0.14455	0.1523	0.15975
K	0.2521	0.20975	0.20057	0.23022	0.0438	0.0437	0.04275	0.0433	0.040125	0.0418	0.038425	0.03905
	0.5	0.25	0.125	0.0625	0.5	0.25	0.125	0.0625	0.5	0.25	0.125	0.0625	AMB
Cg2
AMX	1	2	3	4	5	6	7	8	9	10	11	12
0	0.12865	0.13598	0.14733	0.16467	0.10335	0.128	0.18085	0.15977	0.09875	0.1228	0.14613	0.1717
6.25	0.10692	0.09425	0.13148	0.13318	0.1007	0.09695	0.11507	0.12528	0.08485	0.10035	0.0989	0.15593
12.5	0.11643	0.1064	0.1327	0.1504	0.09405	0.097175	0.1233	0.13248	0.080125	0.1013	0.12652	0.1515
25	0.11918	0.11363	0.12375	0.14085	0.092475	0.10783	0.11097	0.13342	0.086375	0.0986	0.14122	0.15218
50	0.12705	0.12468	0.13678	0.15368	0.098375	0.11875	0.14848	0.15857	0.085	0.11855	0.12163	0.16722
100	0.11595	0.11998	0.15137	0.14797	0.0962	0.1144	0.1435	0.17945	0.085	0.11402	0.13647	0.1776
200	0.115	0.1292	0.1303	0.13463	0.1041	0.12988	0.15363	0.17475	0.10187	0.13268	0.14248	0.1787
K	0.2464	0.21	0.18882	0.20325	0.03985	0.04035	0.03995	0.040275	0.036375	0.03905	0.03535	0.035725
	1	0.5	0.25	0.125	1	0.5	0.25	0.125	1	0.5	0.25	0.125	AMB
Cg3
AMX	1	2	3	4	5	6	7	8	9	10	11	12
0	0.13767	0.15847	0.19678	0.1964	0.11435	0.18953	0.20475	0.21125	0.0927	0.1537	0.17253	0.20988
6.25	0.11517	0.1794	0.19782	0.20865	0.1092	0.20682	0.204	0.20705	0.1104	0.15683	0.19613	0.23575
12.5	0.11128	0.16155	0.18625	0.2052	0.10955	0.2043	0.21238	0.209	0.1102	0.1709	0.177	0.23487
25	0.1096	0.16228	0.1715	0.2051	0.0934	0.19565	0.19873	0.2014	0.10838	0.1583	0.20008	0.22895
50	0.10477	0.16578	0.19267	0.21062	0.0891	0.18442	0.20542	0.20968	0.09605	0.1784	0.18378	0.22013
100	0.10638	0.16168	0.15988	0.22168	0.10705	0.16633	0.18757	0.21683	0.10608	0.1661	0.1917	0.23655
200	0.12523	0.16997	0.19537	0.20523	0.11047	0.2047	0.21747	0.22703	0.09935	0.19815	0.19787	0.26237
K	0.2523	0.22107	0.22408	0.23555	0.042275	0.0416	0.04085	0.042125	0.059575	0.043175	0.0388	0.037625
	0.25	0.125	0.0625	0.03125	0.25	0.125	0.0625	0.03125	0.25	0.125	0.0625	0.03125	AMB
Cg4
AMX	1	2	3	4	5	6	7	8	9	10	11	12
0	0.0957	0.1353	0.1532	0.17015	0.06605	0.14345	0.16328	0.16555	0.066675	0.11733	0.14097	0.17605
6.25	0.082275	0.10272	0.14533	0.1555	0.059225	0.11363	0.151	0.15027	0.056675	0.11642	0.13948	0.16645
12.5	0.077775	0.099525	0.13965	0.14683	0.060025	0.13377	0.16995	0.16345	0.057575	0.13602	0.14118	0.17545
25	0.076425	0.0902	0.1487	0.15088	0.070525	0.12102	0.14777	0.16007	0.060425	0.1336	0.14103	0.21098
50	0.0735	0.08995	0.13135	0.16997	0.060275	0.12327	0.1626	0.15563	0.062125	0.11365	0.13338	0.19645
100	0.0773	0.10047	0.12425	0.1448	0.063125	0.1119	0.13518	0.1788	0.0638	0.12415	0.14265	0.1998
200	0.077475	0.093925	0.1193	0.1441	0.057	0.17125	0.18815	0.19207	0.063525	0.11848	0.1432	0.19963
K	0.31135	0.25308	0.20928	0.24665	0.041425	0.0416	0.041575	0.040325	0.040575	0.0493	0.037975	0.039575
	1	0.5	0.25	0.125	1	0.5	0.25	0.125	1	0.5	0.25	0.125	AMB
Cg5
AMX	1	2	3	4	5	6	7	8	9	10	11	12
0	0.11105	0.13243	0.18565	0.19003	0.085725	0.15078	0.16835	0.1697	0.07605	0.11815	0.14627	0.17147
6.25	0.10407	0.12527	0.14083	0.1444	0.074375	0.12565	0.1421	0.15018	0.085825	0.13225	0.1338	0.14968
12.5	0.093	0.11195	0.13123	0.1605	0.0737	0.11472	0.11463	0.1558	0.066625	0.1338	0.12652	0.1837
25	0.08665	0.092925	0.12422	0.14385	0.067625	0.11385	0.1334	0.13545	0.07685	0.107	0.1208	0.17757
50	0.097425	0.10735	0.12568	0.14472	0.075575	0.10608	0.12635	0.15297	0.078275	0.11708	0.12988	0.1663
100	0.08535	0.10208	0.13897	0.15465	0.073575	0.11195	0.12247	0.14382	0.07365	0.1124	0.1336	0.19782
200	0.0982	0.11085	0.14267	0.1491	0.0869	0.14603	0.16037	0.17135	0.0776	0.11928	0.1406	0.17763
K	0.29165	0.22795	0.22173	0.24217	0.0448	0.044225	0.0432	0.045575	0.045375	0.041525	0.04145	0.04175
	1	0.5	0.25	0.125	1	0.5	0.25	0.125	1	0.5	0.25	0.125	AMB
Cg6
AMX	1	2	3	4	5	6	7	8	9	10	11	12
0	0.12722	0.18857	0.18413	0.19305	0.12485	0.20577	0.23032	0.2121	0.10085	0.144	0.17042	0.22923
6.25	0.12975	0.14695	0.16262	0.17458	0.098875	0.1404	0.1551	0.18435	0.0937	0.13432	0.16535	0.205
12.5	0.12797	0.11897	0.18063	0.19327	0.1035	0.13755	0.1626	0.17138	0.073675	0.15225	0.15907	0.21795
25	0.1115	0.1448	0.17935	0.18947	0.10362	0.15222	0.17357	0.18063	0.096275	0.14455	0.16893	0.25032
50	0.10788	0.14457	0.1825	0.17102	0.10175	0.14803	0.17032	0.17205	0.10455	0.13365	0.1519	0.19735
100	0.12765	0.14635	0.17173	0.1669	0.098675	0.13035	0.17742	0.16975	0.091675	0.14345	0.15848	0.21835
200	0.11285	0.1457	0.1591	0.18255	0.11675	0.1938	0.23298	0.19625	0.098575	0.15582	0.16175	0.22608
K	0.27795	0.24222	0.22817	0.2586	0.041175	0.042075	0.04305	0.04165	0.0432	0.04125	0.038475	0.03935
	0.25	0.125	0.0625	0.03125	0.25	0.125	0.0625	0.03125	0.25	0.125	0.0625	0.03125	AMB
Sc1
AMX	1	2	3	4	5	6	7	8	9	10	11	12
0	0.077325	0.23807	0.28787	0.2524	0.1499	0.1658	0.2966	0.25953	0.12137	0.0579	0.15152	0.25453
6.25	0.1105	0.11727	0.31332	0.27237	0.098375	0.16335	0.3482	0.30538	0.077425	0.14945	0.30782	0.24733
12.5	0.1185	0.14353	0.30917	0.27872	0.070625	0.1334	0.30633	0.28943	0.0775	0.15607	0.2483	0.2741
25	0.11487	0.14593	0.2973	0.27088	0.0768	0.1559	0.27262	0.2671	0.07225	0.11667	0.2782	0.19822
50	0.073575	0.12915	0.3217	0.31297	0.076925	0.07035	0.29258	0.27637	0.08445	0.068575	0.24592	0.23637
100	0.093875	0.17655	0.31945	0.2164	0.0848	0.1206	0.30358	0.3087	0.071825	0.0831	0.2944	0.26878
200	0.082325	0.09725	0.2028	0.31163	0.083925	0.08	0.2468	0.2932	0.068825	0.07665	0.12045	0.2236
K	0.2638	0.24698	0.24475	0.24267	0.044	0.046575	0.0491	0.0453	0.041125	0.038075	0.0407	0.05445
	4	2	1	0.5	4	2	1	0.5	4	2	1	0.5	ITC
Sc2
AMX	1	2	3	4	5	6	7	8	9	10	11	12
0	0.10888	0.17715	0.17163	0.1493	0.10007	0.12912	0.15457	0.1505	0.10213	0.12593	0.16235	0.16425
6.25	0.079125	0.13625	0.1303	0.152	0.10908	0.1685	0.17723	0.13862	0.10168	0.1722	0.14595	0.15625
12.5	0.11505	0.16827	0.15555	0.10983	0.10198	0.17553	0.14388	0.1419	0.10675	0.12505	0.1788	0.1549
25	0.13402	0.1272	0.12573	0.1098	0.050275	0.20888	0.12712	0.13798	0.11985	0.14097	0.14333	0.16387
50	0.12045	0.15727	0.15708	0.14135	0.10293	0.16657	0.16153	0.1507	0.081375	0.20742	0.16363	0.15612
100	0.11665	0.1428	0.18327	0.1383	0.1256	0.17423	0.16657	0.1352	0.10437	0.15968	0.1861	0.17975
200	0.11223	0.17205	0.1875	0.18672	0.10925	0.15348	0.17283	0.19497	0.11107	0.1572	0.19402	0.20823
K	0.2133	0.17475	0.16367	0.20655	0.04165	0.041	0.040675	0.0413	0.037	0.0381	0.0388	0.0382
	8	4	2	1	8	4	2	1	8	4	2	1	ITC
Sc3
AMX	1	2	3	4	5	6	7	8	9	10	11	12
0	0.043475	0.0942	0.1167	0.12898	0.041375	0.1185	0.12435	0.12348	0.038925	0.1145	0.1232	0.13493
6.25	0.04165	0.10315	0.1022	0.18733	0.03815	0.083525	0.098475	0.14852	0.036825	0.09985	0.13065	0.1254
12.5	0.0404	0.1942	0.19185	0.1805	0.039125	0.095125	0.13727	0.14468	0.03755	0.11142	0.13252	0.13123
25	0.0411	0.10627	0.1598	0.13328	0.03945	0.12815	0.17785	0.13642	0.0378	0.11203	0.14388	0.151
50	0.039275	0.097575	0.1374	0.18263	0.04085	0.14175	0.13047	0.15898	0.038475	0.13673	0.1499	0.15285
100	0.042075	0.13685	0.15082	0.1759	0.039125	0.1259	0.15545	0.15183	0.0421	0.13938	0.15902	0.1543
200	0.051075	0.12088	0.1408	0.14085	0.05465	0.12085	0.13342	0.13813	0.042875	0.1234	0.13705	0.14122
K	0.14975	0.13803	0.1654	0.15958	0.041625	0.0425	0.043025	0.0444	0.039075	0.038975	0.0388	0.039775
	2	1	0.5	0.25	2	1	0.5	0.25	2	1	0.5	0.25	ITC
Sc4
AMX	1	2	3	4	5	6	7	8	9	10	11	12
0	0.042025	0.15115	0.14683	0.14085	0.04255	0.13728	0.14515	0.14702	0.042725	0.15748	0.1397	0.12905
6.25	0.041775	0.13097	0.12098	0.15982	0.041	0.15132	0.1182	0.12445	0.03995	0.13383	0.12585	0.15187
12.5	0.0427	0.12175	0.14183	0.1205	0.042825	0.1322	0.13203	0.10345	0.039525	0.1233	0.13475	0.12692
25	0.04335	0.15722	0.14225	0.14472	0.041175	0.15183	0.17527	0.13723	0.0487	0.13888	0.1175	0.10635
50	0.038725	0.14582	0.16012	0.13835	0.040575	0.13475	0.1402	0.1496	0.038725	0.13315	0.13543	0.14455
100	0.041575	0.15792	0.153	0.13363	0.041225	0.1073	0.17052	0.13557	0.040475	0.13035	0.13293	0.11438
200	0.0415	0.1918	0.23995	0.17192	0.04185	0.1358	0.18137	0.15975	0.04055	0.20515	0.13862	0.1488
K	0.1732	0.1804	0.15202	0.19168	0.0437	0.042525	0.0425	0.044225	0.039725	0.03925	0.0382	0.038325
	1	0.5	0.25	0.125	1	0.5	0.25	0.125	1	0.5	0.25	0.125	ITC
Sc5
AMX	1	2	3	4	5	6	7	8	9	10	11	12
0	0.049475	0.0527	0.15818	0.14518	0.048175	0.067375	0.14707	0.15548	0.046775	0.05685	0.15737	0.1452
6.25	0.047425	0.044	0.12695	0.14632	0.040675	0.0498	0.12388	0.15708	0.0429	0.050475	0.15857	0.19078
12.5	0.044925	0.047675	0.16772	0.14315	0.0427	0.05385	0.10397	0.1636	0.043675	0.074425	0.15213	0.16355
25	0.047175	0.045875	0.11542	0.1733	0.044075	0.0625	0.1547	0.1541	0.04495	0.05415	0.16293	0.14828
50	0.041025	0.045775	0.1244	0.16538	0.04055	0.06095	0.124	0.15065	0.0449	0.04695	0.12458	0.16858
100	0.0454	0.047375	0.15025	0.1464	0.04305	0.0493	0.1171	0.15465	0.041825	0.053975	0.15305	0.16547
200	0.047825	0.055125	0.13862	0.13615	0.04545	0.089875	0.1406	0.15102	0.0448	0.06795	0.13103	0.15003
K	0.16797	0.1639	0.14457	0.15808	0.0403	0.04065	0.040375	0.0412	0.037	0.036975	0.036625	0.036275
	4	2	1	0.5	4	2	1	0.5	4	2	1	0.5	ITC
Cg1
AMX	1	2	3	4	5	6	7	8	9	10	11	12
0	0.16552	0.1471	0.15593	0.15402	0.1564	0.15425	0.1718	0.18075	0.1618	0.16498	0.17315	0.19605
6.25	0.1627	0.12525	0.14173	0.1431	0.15025	0.11397	0.1296	0.13465	0.15605	0.1244	0.13092	0.16563
12.5	0.14038	0.11688	0.15698	0.14285	0.14793	0.12215	0.14205	0.15075	0.1488	0.13453	0.14953	0.15645
25	0.14198	0.11478	0.1539	0.16865	0.1231	0.1389	0.13172	0.1425	0.14928	0.11838	0.12767	0.15135
50	0.13868	0.11367	0.1409	0.13397	0.10615	0.12613	0.13023	0.14405	0.13525	0.1286	0.1222	0.16618
100	0.14398	0.11715	0.14017	0.14275	0.14652	0.11357	0.13967	0.15102	0.084075	0.1137	0.13485	0.17357
200	0.11635	0.1157	0.14675	0.14795	0.1288	0.1372	0.16337	0.1513	0.12288	0.1119	0.12973	0.15675
K	0.29048	0.24442	0.24332	0.26678	0.04245	0.04265	0.0423	0.04495	0.0385	0.03655	0.037075	0.03945
	2	1	0.5	0.25	2	1	0.5	0.25	2	1	0.5	0.25	ITC
Cg2
AMX	1	2	3	4	5	6	7	8	9	10	11	12
0	0.057375	0.18352	0.18505	0.22168	0.06025	0.1938	0.2111	0.24262	0.055175	0.1646	0.2295	0.22987
6.25	0.06095	0.14268	0.1543	0.16062	0.050225	0.14832	0.15555	0.17072	0.048525	0.12318	0.1836	0.2159
12.5	0.0616	0.1342	0.17335	0.16935	0.0506	0.12477	0.16735	0.19113	0.0455	0.1611	0.15403	0.18733
25	0.061125	0.15915	0.17998	0.16565	0.079875	0.15798	0.16675	0.17478	0.049425	0.16952	0.1448	0.21385
50	0.05495	0.12063	0.17605	0.15675	0.0507	0.11987	0.1667	0.17398	0.0519	0.14303	0.14308	0.18152
100	0.05475	0.12235	0.16093	0.17408	0.054125	0.11915	0.18282	0.17932	0.0518	0.13995	0.20327	0.22827
200	0.058975	0.1437	0.1589	0.18433	0.056575	0.17112	0.20497	0.20223	0.05355	0.14273	0.19255	0.23438
K	0.24563	0.20667	0.24213	0.24042	0.0429	0.04325	0.043025	0.0444	0.0394	0.038425	0.0441	0.039575
	1	0.5	0.25	0.125	1	0.5	0.25	0.125	1	0.5	0.25	0.125	ITC
Cg3
AMX	1	2	3	4	5	6	7	8	9	10	11	12
0	0.12185	0.10633	0.15105	0.17308	0.1298	0.11725	0.15317	0.1905	0.12878	0.108	0.1471	0.18308
6.25	0.10392	0.1061	0.14283	0.1828	0.15155	0.11832	0.15315	0.17542	0.14298	0.10337	0.15048	0.1861
12.5	0.1371	0.1051	0.14752	0.1692	0.13195	0.1151	0.15475	0.16405	0.13322	0.10355	0.14505	0.18393
25	0.11035	0.11485	0.1477	0.17703	0.1542	0.11953	0.15758	0.17102	0.12773	0.1023	0.15735	0.18028
50	0.12773	0.096225	0.13823	0.1601	0.13365	0.10835	0.14822	0.16145	0.13733	0.1021	0.15325	0.17908
100	0.12413	0.11575	0.12472	0.18317	0.12212	0.11648	0.1461	0.17515	0.11998	0.10047	0.16438	0.1777
200	0.1154	0.093725	0.13055	0.16598	0.094875	0.10792	0.13758	0.16192	0.1077	0.10268	0.15307	0.16955
K	0.26095	0.22948	0.23015	0.23775	0.042875	0.043625	0.04375	0.0428	0.037975	0.03995	0.040525	0.040575
	4	2	1	0.5	4	2	1	0.5	4	2	1	0.5	ITC
Cg4
AMX	1	2	3	4	5	6	7	8	9	10	11	12
0	0.041375	0.09905	0.12307	0.14185	0.04225	0.1166	0.14055	0.16547	0.04645	0.08655	0.1232	0.1627
6.25	0.0407	0.10883	0.10698	0.20188	0.042675	0.11067	0.15763	0.14028	0.04245	0.10293	0.1119	0.15738
12.5	0.039575	0.082225	0.12755	0.12315	0.037475	0.0839	0.11707	0.13993	0.04445	0.12825	0.1405	0.18677
25	0.039225	0.076875	0.16885	0.1906	0.040775	0.0813	0.13938	0.15387	0.0509	0.1085	0.12723	0.15815
50	0.0375	0.070225	0.10087	0.16308	0.03985	0.10238	0.12773	0.1593	0.050925	0.1099	0.132	0.19625
100	0.04055	0.10217	0.1708	0.16752	0.039475	0.10465	0.11817	0.1531	0.05105	0.10485	0.14245	0.2045
200	0.039175	0.089175	0.12305	0.22977	0.042375	0.11495	0.16072	0.16705	0.0546	0.12105	0.14948	0.20515
K	0.2713	0.22097	0.21182	0.23335	0.040225	0.042525	0.042025	0.041325	0.0373	0.036175	0.037475	0.037225
	2	1	0.5	0.25	2	1	0.5	0.25	2	1	0.5	0.25	ITC
Cg5
AMX	1	2	3	4	5	6	7	8	9	10	11	12
0	0.20963	0.17572	0.20035	0.22078	0.19682	0.17977	0.1834	0.2171	0.19623	0.1747	0.18872	0.22478
6.25	0.17735	0.1622	0.2262	0.24725	0.18547	0.1926	0.22875	0.22538	0.1221	0.17362	0.21173	0.2607
12.5	0.17897	0.11502	0.21057	0.26825	0.18755	0.097125	0.19135	0.18423	0.1663	0.14388	0.19803	0.2182
25	0.21523	0.16993	0.24645	0.23745	0.1865	0.17127	0.20513	0.23682	0.18485	0.17673	0.2207	0.27
50	0.23532	0.1792	0.22688	0.22855	0.19785	0.17272	0.18355	0.22775	0.1913	0.159	0.21797	0.27037
100	0.2326	0.1813	0.20305	0.2469	0.21018	0.18675	0.21725	0.2357	0.20085	0.17943	0.21655	0.2606
200	0.22238	0.1907	0.21442	0.25717	0.21753	0.21002	0.20757	0.26037	0.21183	0.1901	0.1976	0.26587
K	0.26772	0.2422	0.239	0.25308	0.044725	0.044375	0.044275	0.042875	0.039	0.039075	0.037875	0.039
	16	8	4	2	16	8	4	2	16	8	4	2	ITC
Cg6
AMX	1	2	3	4	5	6	7	8	9	10	11	12
0	0.24343	0.22015	0.1959	0.1953	0.23388	0.21535	0.20507	0.19975	0.20972	0.211	0.19775	0.1901
6.25	0.24537	0.1862	0.1761	0.18468	0.23738	0.20707	0.20482	0.1912	0.23115	0.20032	0.20362	0.21162
12.5	0.25445	0.20622	0.13345	0.19207	0.24043	0.2051	0.1885	0.191	0.2232	0.20272	0.21135	0.21212
25	0.24185	0.1934	0.18715	0.1706	0.22312	0.17928	0.2002	0.19315	0.22308	0.20077	0.20555	0.21743
50	0.22928	0.19193	0.15233	0.1854	0.1807	0.19475	0.1913	0.1697	0.22973	0.19518	0.2054	0.2032
100	0.23748	0.18108	0.1742	0.19065	0.22537	0.21178	0.20742	0.19365	0.21858	0.20765	0.1986	0.2069
200	0.23265	0.17423	0.1825	0.19103	0.22787	0.21182	0.2076	0.19752	0.212	0.20868	0.21242	0.19085
K	0.2589	0.21418	0.21673	0.22695	0.04245	0.04345	0.042875	0.042525	0.0385	0.03755	0.0376	0.04015
	64	32	16	8	64	32	16	8	64	32	16	8	ITC
Sc6
AMX	1	2	3	4	5	6	7	8	9	10	11	12
0	0.055	0.04695	0.05245	0.13352	0.05045	0.048175	0.05145	0.13358	0.050125	0.047475	0.0527	0.13115
12.5	0.051825	0.043775	0.054325	0.14015	0.05035	0.04625	0.057525	0.13098	0.047525	0.046375	0.05475	0.1385
25	0.055175	0.045875	0.05835	0.13962	0.04805	0.047475	0.059275	0.13805	0.04825	0.0461	0.0569	0.1439
50	0.0568	0.04605	0.052975	0.13818	0.047075	0.0449	0.06425	0.13855	0.051475	0.0451	0.06165	0.1398
100	0.0576	0.044525	0.04645	0.13195	0.049275	0.04435	0.053225	0.13553	0.050975	0.0475	0.052625	0.13537
200	0.0583	0.044675	0.0507	0.13493	0.051275	0.04825	0.05225	0.1334	0.0477	0.0465	0.049525	0.13335
400	0.0533	0.0479	0.0512	0.0719	0.0488	0.04815	0.05765	0.10125	0.0484	0.046775	0.054275	0.077375
K	0.144	0.13688	0.13553	0.14765	0.0411	0.04045	0.03855	0.040125	0.038075	0.0384	0.035875	0.03735
	4	2	1	0.5	4	2	1	0.5	4	2	1	0.5	ITC
Cg1
MPA	1	2	3	4	5	6	7	8	9	10	11	12
0	0.12082	0.1612	0.10612	0.16653	0.14068	0.15368	0.15118	0.17815	0.13623	0.14345	0.13535	0.18358
12.5	0.06445	0.0587	0.088675	0.14582	0.070275	0.09615	0.10633	0.16285	0.070325	0.07165	0.084075	0.16222
25	0.0551	0.056375	0.06685	0.12933	0.06095	0.0903	0.094575	0.13605	0.05505	0.070775	0.11685	0.17603
50	0.06065	0.048925	0.052975	0.10222	0.0568	0.053025	0.071275	0.142	0.052975	0.048275	0.061125	0.1321
100	0.041875	0.038525	0.053625	0.10537	0.04565	0.047475	0.059225	0.14213	0.048025	0.046025	0.0581	0.1291
200	0.04195	0.037175	0.049325	0.10105	0.04985	0.057	0.062125	0.12173	0.052625	0.052325	0.06845	0.14895
400	0.045825	0.037125	0.0409	0.065375	0.043075	0.04235	0.05965	0.0919	0.0466	0.03845	0.04845	0.0724
K	0.22803	0.2143	0.20452	0.21328	0.04185	0.0425	0.041925	0.042725	0.039525	0.039825	0.0409	0.039025
	4	2	1	0.5	4	2	1	0.5	4	2	1	0.5	ITC
Sc4
MPA	1	2	3	4	5	6	7	8	9	10	11	12
0	0.1217	0.13582	0.13232	0.16287	0.096375	0.13203	0.13427	0.15758	0.087925	0.1418	0.1747	0.1416
12.5	0.12305	0.1318	0.14095	0.14693	0.09065	0.15813	0.16445	0.13932	0.116	0.1468	0.14568	0.17392
25	0.13342	0.15035	0.12375	0.12845	0.11597	0.1366	0.14645	0.16678	0.1129	0.17613	0.17167	0.18145
50	0.11842	0.14668	0.13942	0.15608	0.11967	0.14468	0.12498	0.1341	0.12485	0.1301	0.15868	0.1649
100	0.1152	0.13392	0.15337	0.15972	0.11283	0.15323	0.1562	0.14192	0.11485	0.12875	0.16618	0.15673
200	0.07095	0.13545	0.16478	0.14797	0.091525	0.14165	0.16348	0.16827	0.06445	0.14253	0.19663	0.23435
400	0.05025	0.072375	0.11163	0.1283	0.05645	0.13043	0.15565	0.16877	0.04675	0.1221	0.15978	0.15597
K	0.12443	0.14932	0.11152	0.15878	0.042375	0.040475	0.041525	0.0422	0.03765	0.037775	0.03815	0.039
	4	2	1	0.5	4	2	1	0.5	4	2	1	0.5	AMB
Sc3
CsA	1	2	3	4	5	6	7	8	9	10	11	12
0	0.04275	0.044825	0.1198	0.12525	0.038475	0.05585	0.12295	0.1248	0.0381	0.065725	0.1235	0.1292
0.125	0.0384	0.04735	0.12212	0.13043	0.03595	0.058375	0.1322	0.13932	0.03605	0.076575	0.1349	0.14302
0.25	0.035975	0.03635	0.12683	0.13217	0.03565	0.048225	0.13723	0.13543	0.034425	0.053725	0.14048	0.1312
0.5	0.037	0.03715	0.11035	0.13785	0.039275	0.04115	0.11763	0.13605	0.035825	0.0404	0.13103	0.14128
1	0.03675	0.036625	0.041425	0.12728	0.039625	0.035975	0.04575	0.13555	0.037025	0.03575	0.054275	0.1364
2	0.039325	0.03475	0.035925	0.04935	0.03805	0.035125	0.034825	0.042175	0.03825	0.0362	0.0343	0.052575
4	0.043225	0.0421	0.035075	0.0352	0.03935	0.0344	0.034825	0.03485	0.0384	0.03465	0.034575	0.035975
K	0.15435	0.17097	0.13958	0.13238	0.0392	0.039725	0.0396	0.03965	0.03745	0.037275	0.03845	0.039475
	4	2	1	0.5	4	2	1	0.5	4	2	1	0.5	ITC
Sc6
CsA	1	2	3	4	5	6	7	8	9	10	11	12
0	0.057975	0.049525	0.053125	0.1176	0.055475	0.0516	0.051775	0.11263	0.05305	0.050925	0.055	0.13103
0.125	0.0608	0.047775	0.0519	0.09375	0.054625	0.04825	0.050675	0.090575	0.050675	0.04735	0.0514	0.12005
0.25	0.0588	0.047125	0.049325	0.087375	0.05425	0.04715	0.049325	0.09015	0.052125	0.04855	0.0482	0.11957
0.5	0.062625	0.04745	0.05	0.0633	0.05545	0.0491	0.05055	0.05905	0.0556	0.04865	0.0493	0.05925
1	0.0595	0.049775	0.048475	0.04925	0.053025	0.049275	0.04795	0.093125	0.05475	0.048775	0.0499	0.048975
2	0.0588	0.05055	0.0489	0.046825	0.05855	0.049875	0.046475	0.04685	0.05495	0.048625	0.048275	0.04675
4	0.0566	0.048925	0.0472	0.048925	0.0541	0.050025	0.0463	0.05005	0.0575	0.0478	0.049125	0.047525
K	0.16993	0.14255	0.14148	0.15305	0.0422	0.04265	0.04285	0.044025	0.04315	0.039625	0.039575	0.039175
	4	2	1	0.5	4	2	1	0.5	4	2	1	0.5	ITC
Cg6
CsA	1	2	3	4	5	6	7	8	9	10	11	12
0	0.27567	0.25447	0.20507	0.2002	0.33583	0.2541	0.23513	0.21795	0.30125	0.22785	0.21945	0.22855
0.125	0.28163	0.21615	0.20162	0.20458	0.28732	0.22462	0.21695	0.19747	0.26515	0.2097	0.20733	0.22585
0.25	0.28433	0.21217	0.17635	0.18835	0.28935	0.24283	0.21882	0.19442	0.26583	0.21765	0.18548	0.22718
0.5	0.3108	0.19192	0.16917	0.18378	0.28157	0.21745	0.23435	0.18085	0.26045	0.22367	0.1959	0.22498
1	0.25255	0.21057	0.18552	0.1801	0.26985	0.2007	0.1665	0.19305	0.24305	0.20105	0.1943	0.21137
2	0.26635	0.17525	0.16135	0.138	0.2435	0.1892	0.16695	0.1423	0.23075	0.19688	0.179	0.18483
4	0.26382	0.15982	0.15955	0.14353	0.2181	0.1769	0.1484	0.1317	0.1874	0.16483	0.13915	0.14542
K	0.23658	0.19732	0.22173	0.20873	0.04415	0.043325	0.04335	0.044775	0.040725	0.04175	0.041325	0.041275
	64	32	16	8	64	32	16	8	64	32	16	8	ITC
Sc4
CsA	1	2	3	4	5	6	7	8	9	10	11	12
0	0.12202	0.14187	0.11032	0.12947	0.0935	0.11377	0.13297	0.13758	0.0776	0.15008	0.15878	0.15888
0.125	0.1299	0.1152	0.1451	0.12452	0.11547	0.14937	0.1356	0.14838	0.1031	0.1249	0.13743	0.15645
0.25	0.11185	0.12532	0.1471	0.1529	0.10418	0.1438	0.1427	0.14627	0.08265	0.1552	0.15428	0.1713
0.5	0.03605	0.11668	0.13418	0.15725	0.033175	0.14185	0.15083	0.13567	0.033575	0.1323	0.14193	0.15295
1	0.0356	0.042775	0.1295	0.16105	0.037125	0.039475	0.12722	0.15888	0.0346	0.0512	0.12982	0.1929
2	0.03435	0.035475	0.083175	0.21477	0.035425	0.035475	0.16658	0.21817	0.03435	0.0382	0.21413	0.2332
4	0.0346	0.03565	0.0781	0.15538	0.0356	0.036975	0.16823	0.18757	0.0368	0.040675	0.206	0.2036
K	0.13115	0.14363	0.1377	0.1734	0.041075	0.041425	0.0423	0.039725	0.03765	0.035775	0.03575	0.038125
	0.25	0.125	0.0625	0.03125	0.25	0.125	0.0625	0.03125	0.25	0.125	0.0625	0.03125	AMB
Sc6
Fk506	1	2	3	4	5	6	7	8	9	10	11	12
0	0.054925	0.047425	0.055975	0.1255	0.05005	0.049325	0.06625	0.1362	0.045275	0.048925	0.083225	0.13412
0.125	0.0552	0.040775	0.04455	0.11532	0.046575	0.045275	0.050925	0.1298	0.0433	0.04565	0.050525	0.13415
0.25	0.051775	0.045225	0.04525	0.08735	0.04615	0.04365	0.0454	0.1082	0.04395	0.04465	0.0489	0.10537
0.5	0.0534	0.0427	0.047	0.04985	0.0441	0.0444	0.049025	0.0566	0.045375	0.0465	0.046675	0.050225
1	0.052	0.043425	0.043775	0.044275	0.044175	0.0424	0.045775	0.051875	0.044425	0.045525	0.046325	0.046725
2	0.0538	0.042325	0.04515	0.046325	0.045125	0.04055	0.043375	0.047675	0.044775	0.045575	0.04595	0.04505
4	0.0482	0.042725	0.039475	0.0432	0.04525	0.04115	0.041325	0.04255	0.043475	0.042675	0.0445	0.045225
K	0.16245	0.14057	0.13827	0.15157	0.04	0.040075	0.0394	0.039325	0.0369	0.039775	0.038475	0.036525
	4	2	1	0.5	4	2	1	0.5	4	2	1	0.5	ITC
Sc2
Fk506	1	2	3	4	5	6	7	8	9	10	11	12
0	0.12185	0.12072	0.14918	0.13245	0.11335	0.12535	0.1219	0.1629	0.1037	0.15185	0.1437	0.16258
12.5	0.03835	0.12438	0.12027	0.1538	0.035925	0.11677	0.12978	0.13325	0.037125	0.10677	0.12575	0.14658
25	0.039375	0.074025	0.14155	0.13705	0.037325	0.058325	0.12587	0.15282	0.03575	0.08435	0.13983	0.13723
50	0.037375	0.038025	0.16437	0.16223	0.03835	0.0367	0.14415	0.18885	0.037125	0.038375	0.1542	0.16702
100	0.0387	0.03685	0.04475	0.20465	0.037975	0.037125	0.047725	0.19852	0.036525	0.03755	0.0491	0.2027
200	0.043775	0.0371	0.042175	0.18885	0.039475	0.036575	0.042225	0.20428	0.039125	0.03615	0.0429	0.19423
400	0.040225	0.039075	0.04145	0.14177	0.038875	0.03935	0.042875	0.088175	0.039	0.039525	0.04535	0.13535
K	0.16965	0.18542	0.15917	0.186	0.042475	0.0409	0.0429	0.042075	0.0392	0.038975	0.03785	0.039925
	1	0.5	0.25	0.125	1	0.5	0.25	0.125	1	0.5	0.25	0.125	AMB
Cg1
Fk506	1	2	3	4	5	6	7	8	9	10	11	12
0	0.099975	0.12788	0.14378	0.21925	0.11208	0.14593	0.14775	0.1978	0.082725	0.1162	0.18053	0.22113
12.5	0.039275	0.0855	0.1256	0.16655	0.0385	0.0925	0.1177	0.17288	0.037775	0.09155	0.1369	0.22373
25	0.0402	0.057825	0.115	0.14672	0.038875	0.046075	0.1107	0.1382	0.03855	0.046525	0.10225	0.1995
50	0.04025	0.04	0.09095	0.12565	0.0383	0.038525	0.13983	0.14052	0.03915	0.03795	0.1057	0.15455
100	0.0409	0.0394	0.1067	0.17765	0.03885	0.039025	0.0807	0.15342	0.03945	0.038875	0.095775	0.17845
200	0.04495	0.039225	0.077575	0.15452	0.0407	0.0385	0.107	0.14877	0.04125	0.0393	0.07585	0.15812
400	0.043975	0.04295	0.049625	0.1572	0.04015	0.041325	0.0833	0.14775	0.0415	0.04525	0.047325	0.14775
K	0.2508	0.21923	0.21775	0.23287	0.0446	0.04345	0.043325	0.044475	0.0398	0.03955	0.039375	0.039275
	1	0.5	0.25	0.125	1	0.5	0.25	0.125	1	0.5	0.25	0.125	AMB
Cg3
Fk506	1	2	3	4	5	6	7	8	9	10	11	12
0	0.156	0.18295	0.193	0.20882	0.13547	0.18857	0.18982	0.20845	0.14527	0.21023	0.19925	0.23843
12.5	0.096025	0.1411	0.14562	0.17073	0.060975	0.13342	0.16252	0.17215	0.05325	0.12848	0.16115	0.20893
25	0.06595	0.10853	0.15207	0.14497	0.045575	0.11518	0.1526	0.17873	0.040375	0.11193	0.15395	0.202
50	0.050175	0.13858	0.15198	0.18655	0.04095	0.13573	0.15613	0.18235	0.03625	0.11847	0.17238	0.2033
100	0.0882	0.12043	0.16658	0.16712	0.055875	0.11965	0.1534	0.159	0.042025	0.12558	0.15045	0.2181
200	0.10643	0.13363	0.1694	0.1912	0.10023	0.15303	0.19975	0.1714	0.069075	0.13205	0.16768	0.20188
400	0.1607	0.15125	0.18825	0.24473	0.18513	0.21457	0.23697	0.22262	0.12043	0.14797	0.18838	0.19198
K	0.29678	0.26283	0.27373	0.28022	0.0403	0.040425	0.040825	0.040125	0.039675	0.03685	0.038575	0.04225
	0.5	0.25	0.125	0.0625	0.5	0.25	0.125	0.0625	0.5	0.25	0.125	0.0625	AMB
Cg5
Fk506	1	2	3	4	5	6	7	8	9	10	11	12
0	0.11237	0.15995	0.1829	0.18225	0.105	0.1379	0.17052	0.20607	0.12955	0.16473	0.1814	0.21997
12.5	0.0383	0.10593	0.10865	0.14055	0.035375	0.10015	0.11152	0.1428	0.035925	0.099925	0.1202	0.19553
25	0.0387	0.09945	0.1255	0.12622	0.035925	0.0904	0.13005	0.13205	0.03495	0.10262	0.12593	0.18643
50	0.039925	0.0387	0.1141	0.13965	0.036	0.035425	0.12335	0.1425	0.0367	0.035625	0.12855	0.16475
100	0.03965	0.0361	0.147125	0.13945	0.036775	0.03495	0.14703	0.15747	0.037825	0.03585	0.146	0.19355
200	0.040175	0.03705	0.109	0.15747	0.03905	0.037025	0.16403	0.16977	0.03865	0.038025	0.16392	0.1871
400	0.041625	0.03905	0.04275	0.18495	0.037525	0.0402	0.042675	0.16608	0.039275	0.0419	0.06017	0.1723
K	0.28748	0.27602	0.24685	0.27632	0.040325	0.042325	0.040775	0.0422	0.0367	0.0374	0.037125	0.0379
	0.5	0.25	0.125	0.0625	0.5	0.25	0.125	0.0625	0.5	0.25	0.125	0.0625	AMB
Cg3
AMX	1	2	3	4	5	6	7	8	9	10	11	12
0	0.06615	0.11107	0.15805	0.2078	0.071	0.09955	0.17045	0.23038	0.081	0.099125	0.16453	0.20847
6.25	0.0771	0.084275	0.12863	0.16658	0.074275	0.10435	0.16453	0.20603	0.10418	0.11688	0.15602	0.19545
12.5	0.074125	0.096025	0.14217	0.15488	0.078925	0.11298	0.17648	0.18683	0.07165	0.12405	0.17123	0.2022
25	0.067975	0.094625	0.1345	0.17785	0.07375	0.12017	0.19282	0.20935	0.07805	0.1053	0.16955	0.21982
50	0.068575	0.08645	0.13517	0.17018	0.06995	0.10702	0.16183	0.189	0.0803	0.11525	0.15833	0.18553
100	0.0727	0.10273	0.1471	0.18628	0.06605	0.11637	0.17768	0.20435	0.077925	0.11597	0.17832	0.21232
200	0.06655	0.097375	0.13273	0.17275	0.06745	0.096625	0.1609	0.1818	0.070075	0.088425	0.14322	0.16833
K	0.238	0.22375	0.22517	0.2473	0.04305	0.0424	0.0426	0.04185	0.040425	0.041525	0.03935	0.0426
	16	8	4	2	16	8	4	2	16	8	4	2	FLC
Cg4
AMX	1	2	3	4	5	6	7	8	9	10	11	12
0	0.046125	0.0738	0.12905	0.2237	0.04415	0.10392	0.14457	0.21227	0.045075	0.1265	0.15698	0.2208
6.25	0.053775	0.07455	0.13082	0.16762	0.047275	0.0767	0.13745	0.1744	0.0475	0.087675	0.11535	0.2134
12.5	0.0473	0.077125	0.11842	0.19357	0.0486	0.095775	0.1248	0.16332	0.0428	0.1072	0.1405	0.2282
25	0.0582	0.1003	0.12663	0.19333	0.05695	0.09065	0.15223	0.2151	0.050875	0.0983	0.1309	0.21477
50	0.058775	0.0686	0.1302	0.19205	0.043175	0.083025	0.15033	0.19265	0.0432	0.24597	0.13882	0.217
100	0.04665	0.10368	0.11523	0.18805	0.056225	0.10927	0.14155	0.18735	0.0796	0.0885	0.13815	0.20785
200	0.068725	0.0653	0.13252	0.19015	0.045425	0.1135	0.142	0.20527	0.057925	0.1462	0.12558	0.21565
K	0.25872	0.27335	0.25027	0.27733	0.039175	0.042175	0.040325	0.042675	0.03865	0.037525	0.036875	0.03765
	8	4	2	1	8	4	2	1	8	4	2	1	FLC
Cg5
AMX	1	2	3	4	5	6	7	8	9	10	11	12
0	0.116	0.25752	0.25537	0.24115	0.14755	0.27162	0.28685	0.24683	0.09535	0.27088	0.2592	0.26367
6.25	0.17515	0.23902	0.21152	0.19103	0.13325	0.25475	0.24182	0.23285	0.10482	0.17205	0.20235	0.25017
12.5	0.16295	0.26305	0.21085	0.18782	0.15202	0.2858	0.21393	0.19673	0.12088	0.25012	0.25493	0.26493
25	0.16392	0.2677	0.17715	0.2039	0.11485	0.20337	0.26552	0.20808	0.12843	0.2546	0.2042	0.25215
50	0.16605	0.27145	0.27433	0.22218	0.12445	0.26217	0.20603	0.20225	0.10993	0.2195	0.17945	0.2156
100	0.14985	0.1785	0.22195	0.18925	0.1467	0.26243	0.26502	0.2282	0.12128	0.25945	0.20095	0.2331
200	0.14603	0.26333	0.28395	0.20195	0.14487	0.28955	0.25495	0.24565	0.11855	0.27105	0.25853	0.2134
K	0.27902	0.2444	0.23935	0.27797	0.04425	0.043975	0.0443	0.043275	0.040275	0.039775	0.03925	0.038725
	128	64	32	16	128	64	32	16	128	64	32	16	FLC
Cg6
AMX	1	2	3	4	5	6	7	8	9	10	11	12
0	0.04155	0.10608	0.21845	0.19823	0.042225	0.1266	0.21632	0.22605	0.04175	0.11293	0.22107	0.23715
6.25	0.0409	0.10768	0.1406	0.16183	0.040975	0.10837	0.13917	0.15615	0.039175	0.11085	0.17938	0.20595
12.5	0.03985	0.14085	0.13505	0.15448	0.03745	0.10788	0.12695	0.16293	0.043475	0.1289	0.17718	0.2333
25	0.046675	0.10028	0.18105	0.14307	0.04495	0.12377	0.20173	0.1501	0.039475	0.15702	0.13585	0.19945
50	0.041175	0.10972	0.16765	0.16402	0.03815	0.096475	0.14665	0.18293	0.04005	0.16278	0.15332	0.23722
100	0.042425	0.11995	0.1781	0.15757	0.040275	0.14797	0.15817	0.17555	0.039825	0.14557	0.18813	0.2635
200	0.04195	0.10577	0.14608	0.18775	0.040025	0.11012	0.18125	0.1796	0.040575	0.12765	0.15197	0.174
K	0.19617	0.2292	0.2084	0.22785	0.042475	0.041025	0.0422	0.040275	0.037625	0.03925	0.0365	0.036775
	256	128	64	32	256	128	64	32	256	128	64	32	FLC
Sc4
MPA	1	2	3	4	5	6	7	8	9	10	11	12
0	0.0443	0.06025	0.21235	0.13145	0.04315	0.0624	0.17505	0.1456	0.041475	0.060275	0.20507	0.17325
6.25	0.041475	0.083125	0.15642	0.16655	0.040975	0.12205	0.17375	0.15547	0.039325	0.1695	0.15413	0.17397
12.5	0.0422	0.2326	0.17518	0.1573	0.039825	0.24505	0.13702	0.1468	0.04055	0.1187	0.15307	0.14615
25	0.039325	0.24088	0.17257	0.17118	0.039125	0.23138	0.16415	0.1429	0.04075	0.21355	0.1672	0.15765
50	0.0432	0.23687	0.17825	0.18268	0.0414	0.22938	0.19155	0.19893	0.040575	0.2462	0.16097	0.21517
100	0.0463	0.17985	0.1383	0.14093	0.0718	0.1835	0.1542	0.12348	0.045225	0.19987	0.15065	0.14105
200	0.05865	0.1283	0.1161	0.12525	0.050825	0.13618	0.12735	0.1271	0.059025	0.12275	0.12095	0.13255
K	0.20083	0.154	0.19883	0.2054	0.042525	0.042875	0.044175	0.042625	0.042825	0.043475	0.042275	0.042675
	2	1	0.5	0.25	2	1	0.5	0.25	2	1	0.5	0.25	FLC
Sc4
MTX	1	2	3	4	5	6	7	8	9	10	11	12
0	0.10092	0.10948	0.11905	0.11858	0.10617	0.1154	0.13415	0.13408	0.11807	0.11245	0.12465	0.11977
12.5	0.091475	0.086925	0.1205	0.13737	0.08595	0.11205	0.13938	0.1208	0.080375	0.11705	0.11433	0.13925
25	0.0811	0.10567	0.10808	0.12517	0.068	0.11848	0.13807	0.14383	0.08065	0.10602	0.14345	0.12943
50	0.0994	0.12233	0.12618	0.1347	0.066725	0.12628	0.14228	0.134	0.08425	0.1162	0.11893	0.13297
100	0.090875	0.10665	0.1229	0.14395	0.09	0.1107	0.14795	0.14205	0.083875	0.13103	0.11587	0.14092
200	0.093825	0.1227	0.1135	0.1256	0.09685	0.11313	0.11823	0.14257	0.08825	0.0985	0.12635	0.15882
400	0.12147	0.0947	0.12818	0.15937	0.11707	0.14398	0.11433	0.14335	0.08655	0.13248	0.11043	0.15917
K	0.11855	0.11077	0.11155	0.18832	0.0419	0.040825	0.042225	0.043325	0.042775	0.04485	0.042025	0.0427
	2	1	0.5	0.25	2	1	0.5	0.25	2	1	0.5	0.25	AMB
Sc1
AMX	1	2	3	4	5	6	7	8	9	10	11	12
0	0.0808	0.1149	0.13075	0.20593	0.097175	0.10398	0.058175	0.21698	0.06945	0.09205	0.13457	0.164
2	0.085075	0.07325	0.1222	0.12257	0.05635	0.07625	0.0979	0.12545	0.056925	0.06895	0.07765	0.14748
4	0.071225	0.07645	0.12348	0.13685	0.066475	0.11507	0.093125	0.19348	0.061725	0.077825	0.0834	0.15398
8	0.086025	0.064125	0.085175	0.17465	0.067575	0.083875	0.080725	0.1388	0.065725	0.079825	0.093275	0.134
16	0.0798	0.0775	0.094525	0.1991	0.0679	0.09075	0.094125	0.1597	0.06215	0.07255	0.085675	0.14885
32	0.078425	0.07345	0.11052	0.16282	0.0671	0.11372	0.16497	0.24108	0.06515	0.090325	0.084075	0.16203
64	0.0629	0.08555	0.10565	0.1805	0.11067	0.11965	0.11665	0.1346	0.080425	0.078275	0.092275	0.18075
K	0.18263	0.13	0.1833	0.18185	0.0422	0.041025	0.04285	0.041125	0.03965	0.037825	0.038075	0.039
	8	4	2	1	2	1	0.5	0.25	2	1	0.5	0.25	FLC
Sc2
AMX	1	2	3	4	5	6	7	8	9	10	11	12
0	0.15278	0.1732	0.17028	0.18698	0.20655	0.17392	0.1881	0.1945	0.1245	0.22163	0.17562	0.21293
2	0.13015	0.15862	0.15403	0.15857	0.1085	0.19475	0.16435	0.15363	0.10358	0.1828	0.17042	0.16415
4	0.12605	0.2166	0.1684	0.1505	0.10388	0.21038	0.19895	0.1644	0.0906	0.21428	0.17857	0.1556
8	0.14412	0.2248	0.20905	0.18482	0.123	0.25395	0.19665	0.17767	0.097	0.23753	0.17545	0.18045
16	0.1297	0.20905	0.20375	0.21325	0.125	0.25908	0.22055	0.2267	0.12957	0.23017	0.1996	0.19342
32	0.14175	0.20805	0.20615	0.23195	0.12715	0.23975	0.21233	0.21468	0.11022	0.22047	0.18142	0.19235
64	0.15345	0.2123	0.19477	0.18977	0.1239	0.2133	0.19983	0.18565	0.13037	0.19517	0.1836	0.2005
K	0.2311	0.22398	0.21147	0.20828	0.04245	0.0427	0.0439	0.04445	0.040575	0.0402	0.0387	0.0388
	128	64	32	16	128	64	32	16	128	64	32	16	FLC
Sc3
AMX	1	2	3	4	5	6	7	8	9	10	11	12
0	0.04375	0.074175	0.13002	0.13328	0.043725	0.0557	0.13145	0.1364	0.040575	0.0437	0.1329	0.13405
2	0.04535	0.0735	0.12803	0.13565	0.042675	0.07315	0.12738	0.1347	0.041425	0.04275	0.12968	0.12918
4	0.043775	0.10877	0.13	0.13477	0.041025	0.070625	0.12888	0.13313	0.04075	0.0427	0.12972	0.13912
8	0.04735	0.09085	0.13522	0.14415	0.040125	0.091675	0.13183	0.13702	0.04125	0.098725	0.13532	0.13565
16	0.046325	0.11433	0.13923	0.14185	0.04085	0.10187	0.13258	0.13855	0.040725	0.045175	0.13835	0.1357
32	0.0479	0.1094	0.13213	0.1363	0.04245	0.0799	0.12882	0.13885	0.04075	0.052225	0.13415	0.13207
64	0.043175	0.10815	0.1321	0.13392	0.042275	0.067475	0.14087	0.13258	0.042225	0.04185	0.13688	0.12397
K	0.13803	0.12943	0.12755	0.13397	0.042175	0.041775	0.04315	0.0429	0.03865	0.03995	0.037875	0.038675
	64	32	16	8	64	32	16	8	64	32	16	8	FLC
Sc4
AMX	1	2	3	4	5	6	7	8	9	10	11	12
0	0.037825	0.054625	0.17673	0.15278	0.036725	0.08685	0.12857	0.1199	0.03775	0.06925	0.14928	0.13855
2	0.03845	0.1375	0.1632	0.12777	0.03805	0.1664	0.1485	0.13775	0.037025	0.1057	0.1264	0.14745
4	0.039625	0.15642	0.15627	0.14292	0.03855	0.1431	0.15902	0.1163	0.0363	0.10882	0.129	0.15362
8	0.03755	0.16228	0.16295	0.14108	0.037325	0.083825	0.15763	0.16948	0.03685	0.10943	0.1567	0.1338
16	0.037575	0.14408	0.16035	0.1523	0.037725	0.13537	0.14905	0.13418	0.039325	0.076725	0.1321	0.143
32	0.037225	0.0947	0.1728	0.14725	0.036775	0.12017	0.1689	0.13065	0.037175	0.1887	0.10262	0.1492
64
K	0.1063	0.14375	0.14658	0.11647	0.041625	0.0425	0.041575	0.042375	0.039725	0.03865	0.03765	0.038725
	4	2	1	0.5	4	2	1	0.5	4	2	1	0.5	FLC
Sc5
AMX	1	2	3	4	5	6	7	8	9	10	11	12
0	0.051925	0.13025	0.1454	0.1289	0.040225	0.12095	0.1251	0.15597	0.082575	0.12048	0.13368	0.1432
2	0.073	0.12795	0.1386	0.11305	0.059825	0.12597	0.1363	0.1585	0.0414	0.1346	0.10422	0.13032
4	0.043425	0.13385	0.14345	0.12978	0.07835	0.1127	0.14925	0.1227	0.0751	0.11873	0.13113	0.14965
8	0.042475	0.13067	0.1311	0.1621	0.0389	0.11573	0.15745	0.13647	0.0836	0.12857	0.1336	0.13355
16	0.041125	0.12638	0.13755	0.12888	0.05095	0.11902	0.13203	0.15803	0.03975	0.11172	0.1159	0.1548
32	0.06175	0.11732	0.12395	0.1242	0.07505	0.12112	0.1588	0.13172	0.039975	0.10555	0.11975	0.13265
64	0.044825	0.13543	0.13403	0.13815	0.095025	0.13907	0.15415	0.12767	0.0474	0.12673	0.12278	0.14273
K	0.1677	0.15835	0.15135	0.14605	0.041275	0.04165	0.040625	0.042675	0.0384	0.03835	0.040025	0.04015
	16	8	4	2	16	8	4	2	16	8	4	2	FLC
Sc6
AMX	1	2	3	4	5	6	7	8	9	10	11	12
0	0.0524	0.097975	0.13217	0.1288	0.04675	0.1071	0.13123	0.13018	0.044375	0.10525	0.1284	0.13355
2	0.05005	0.12675	0.13762	0.13565	0.049375	0.1252	0.13295	0.1385	0.04625	0.12895	0.13602	0.14358
4	0.05055	0.12417	0.13598	0.12718	0.04265	0.11298	0.1348	0.1365	0.04505	0.121	0.13363	0.13537
8	0.05365	0.1233	0.1378	0.13418	0.046225	0.12467	0.13245	0.13665	0.0462	0.11958	0.13238	0.13787
16	0.0491	0.12945	0.1405	0.14523	0.04645	0.12488	0.14005	0.1373	0.048675	0.11042	0.14412	0.13852
32	0.052325	0.13248	0.14947	0.13318	0.0523	0.13545	0.13678	0.1389	0.047275	0.12727	0.15168	0.14627
64	0.0524	0.09245	0.1381	0.1373	0.047175	0.1071	0.13772	0.13915	0.04535	0.10898	0.14155	0.12885
K	0.13518	0.13717	0.13493	0.1273	0.042525	0.0416	0.041075	0.0438	0.039525	0.04005	0.03885	0.0377
	16	8	4	2	16	8	4	2	16	8	4	2	FLC
Cg1
AMX	1	2	3	4	5	6	7	8	9	10	11	12
0	0.15483	0.14225	0.182	0.20752	0.13157	0.15005	0.1944	0.2288	0.12785	0.14603	0.17118	0.21892
2	0.14893	0.12488	0.16615	0.19332	0.11155	0.13235	0.18082	0.20067	0.10125	0.1282	0.16233	0.20685
4	0.1574	0.1327	0.1749	0.19707	0.1252	0.14537	0.19877	0.23157	0.09565	0.136	0.16525	0.19275
8	0.16488	0.13745	0.17818	0.23157	0.12257	0.15208	0.1976	0.225	0.10923	0.1366	0.16563	0.19557
16	0.1579	0.12837	0.1778	0.21992	0.11435	0.14738	0.1951	0.2451	0.10285	0.13615	0.18565	0.21348
32	0.15325	0.1343	0.16627	0.1905	0.11395	0.13927	0.17658	0.20805	0.10062	0.12462	0.18545	0.22673
64	0.15358	0.13397	0.1588	0.18892	0.12935	0.1639	0.19328	0.20147	0.11292	0.12562	0.15448	0.18655
K	0.22745	0.2427	0.21238	0.22557	0.041475	0.041475	0.043725	0.0439	0.040575	0.037925	0.03785	0.040125
	4	2	1	0.5	4	2	1	0.5	4	2	1	0.5	FLC
Cg2
AMX	1	2	3	4	5	6	7	8	9	10	11	12
0	0.05755	0.0812	0.217	0.21602	0.057875	0.0822	0.22145	0.21187	0.05135	0.087675	0.19043	0.228
2	0.061175	0.0964	0.20335	0.19897	0.055575	0.12617	0.24195	0.23167	0.051125	0.10037	0.18962	0.2189
4	0.063975	0.07285	0.18203	0.22408	0.05555	0.09905	0.19348	0.22105	0.04745	0.07955	0.18275	0.22255
8	0.061925	0.096	0.21203	0.2104	0.054525	0.1145	0.19133	0.22607	0.051225	0.11132	0.16958	0.19795
16	0.0604	0.1131	0.2047	0.21645	0.05355	0.13228	0.19775	0.21217	0.0499	0.12013	0.15853	0.2127
[truncated: 268 more rows]

## Sheet: Stock solutions
	solvent	min [ug/ml]	max [ug/mL]
MPA	DMSO	4000	12800
MTX	DMSO	6250	6250
CsA	DMSO	1600	3200
Fk506	DMSO	1024	1024
AMB	DMSO	1600	1600
ITC	DMSO	1000	1600
POS	DMSO	1000	1000
KCT	DMSO	2000	2000
VRC	DMSO	2000	2000
CLO	DMSO	8000	8000
AMX	RPMI/YPD	4000	4000
FLC	RPMI/YPD	640	1024
FLC	DMSO	8000	16000
